# Supplementary material for: Serotype Screening of Salmonella enterica Subspecies I by Intergenic Sequence Ribotyping (ISR): Critical Updates
Source: MDPI journal article supplement (doi:10.3390/microorganisms11010097), 2022-12-30
Supplement: s1 [file s1]

>(1)C Schwarzengrund\_CP074340

ATGTTTTGGC GGTTGAGAGA TGATTTTCAG CACTGATTCA GATTACATCA GAACGTAAAA 60

ACGGTCTGAT AACAGAATTT GCCTGGCGGC ACTAGCGCGG TGGTCCCACC TGACCCCATG 120

CCGAACTCAG AAGTGAAACG CCGTAGCGCC GATGGTAGTG TGGGGTCTCC CCATGCGAGA 180

GTAGGGAECT GCCAGGCATC AAATTAAGCA GTAAGCCGGT CATAAACCGG TGGTTGTAAA 240

AGAATCCGGT GGAGCGG 257

>(2)C Thompson\_NoNCBI match

ATGTTTTGGC GATTGAGAAG ACGATTTTCA GCACTGATTC AGATTACATC AGAACGTAAA 60

AACGGTCTGA TAACAGAATT TGCCTGGCGG CCGTAGCGCG GTGGTCCCAC CTGACCCCAT 120

GCCGAACTCA GAAGTGAAAC GCCGTAGCGC CGATGGTAGT GTGGGGTCTC CCCATGCGAG 180

AGTAGGGAAC TGCCAGGCAT CAATTTAAGC AGTAACTGA TGTA AAAATC AGTGATTGTA 240

AAAGAATTCG GTGGAGCGG 259

>(3)C Cerro\_CP012833

ATGTTTTGGC GGATGAGAGA AGATTTTCAG CACTGATTCA GAGTTGAGTA CGCAATAATT 60

TGCGCAGCAG CAAGGCGGCA AGCGAAGGAA AGGAAGGAGC ATACAGAAGT ATGTGACTGA 120

CTTTACGAGC GCAGGCAACG CCGCTGATGC GATAAAGAAT TCGTACTGA GCACAAAAGA 180

ATTTGCCTGG CGGCACTAGC GCGGTGGTCC CACCTGACCC CATGCCGAAC TCAGAAGTGA 240

AACGCCGTAG CGCCGATGGT AGTGTGGGGT CTCCCATGC GAGAGTAGGG AACTGCCAGG 300

CATCAAATTA AGCAGTAAGC CGGTCATAGA CTGGTGGTTG TAAAGAATT CGGTGGAGCG 360

G 361

>(4)X Senftenberg\_CP032194

CTTGCCCCGA GATGAGTTCT CCCTGAGACT TTAGGTCTCC TGAAGGAACG TTGAAGACGA 60

CGACGTTGAT AGGCCGGGTG TGTAAGCGCA GCGATGCGTT GAGCTAACCG GACTAATGA 120

ACCGTGAGGC TTAACCTTAC AACGCCGAAG ATGTTTTGGC GGATGAGAGA TGATTTTCAG 180

CACTGATTCA GAGTTGAGTA CGCAATAATT TGCGCAGCAG CAAGGCGGCA AGCGAAGGAA 240

AGGAAGGAGC ATACAGAAGT ATGTGACTGA GTTTACGAGC GCAGGCAACG CCGCTGATGC 300

GATAAAGAAT TCGGTACAGA GCATAAAGA ATTTGCCTGG CGGCCGTAGC GCGGTGGTCC 360

CACCTGACCC CATGCCGAAC TCAGAAGTGA AACGCCGTAG CGCCGATGGT AGTGTGGGGT 420

CTCCCATGC GAGAGTAGGG AACTGCCAGG CATCAAATTA AGCAGTAAAC TGATGTAATA 480

ATCAGTGGTT GTAAAAGAAT TCGGTGGAGC GGTAGTTCAG TTGGTTAGAA TACCTGCCTG 540

TCACGCAGGG GGTCGCGGGT TCGAGTCCCG TCCGTTCCGC CACTTATTAA GAGCCCTGAG 600

CATTAGCTCA GGGCTTTTTT TTTGCCTGTC ATTTAATTAT TGCTCAATTC GCAAAAATCC 660

TCTGCATTTT TCGCTCTTTT TCTGCAAAGC GCTGAAGGTC ATAATCCCCT CAGTTAACGA 720

ACATAGTGAT TAAAAAGAGG AATTCTATGA CTATCCCTGC ATTCGGTTTA GGTACTTTTC 780

GCCTGAAAGA CGACGTGGTT ATCGCTTCTG TGAAAACGGC GCTTGAAGTGGCTACCGTG 840

CTGTCGACAC TGCGCAAATC TATGATAATG AAGCGGCTGT TGGACAGGCG ATTGCTGAGA 900

GCGGCGTACC GCGTAATGAG CTGTACATCA CCACCAAGAT CTGGATTGAA AACCTTAGCA 960

AAGACAAGCT AATCCAAGC CTGAAAGAGA GCCTGAAAAA ACTGCGTACC GATTATGTCTG 1020

ATCTGACGCT GATCCACTGG CCATCTCCGG GTGATGCTGT GTCTGTGCGAA GAATTTATGC 1080

AGGCATTGCT GGAAGCTAAA AAACAAGGGC TGAAGTCCGA AATTGGCATT TCAAACCTCA 1140

CATTCCGTTG ATGAA

1155

>(5)X Oranienburg\_Typhimurium\_CP03344\_CP029029

GGAAGAGATA AGTGCTGAAA GCATCTAAGC ACGAAACTTG CCCCGAGATG AGTTCTCCCT 60

GAGACTTTAG GTCTCCTGAA GGAACGTTGA AGACGACGAC GTTGATAGGC CGGGTGTGTA 120

AGCGCAGCGA TCGGTTGAGC TAACCGGTAC TAATGAACCG TGAGGCTTAA CCTTACAACG 180

CCGAAGATGT TTTGGCGGTT GAGAAGACAA CAATTTTCAG CACTGATTCA GAGTTGAGTA 240

CGCAATAATT TGCGCAGCAG CAAGGCGGCA AGCGAAGGAA AGGAAGGAGC ATACAGAAGT 300

ATGTGACTGA CTTTACGAGC GCAGGCAACG CCGCTGATGC GATAAAGAAT TCGGTACAGA 360

GCACAAAAGA ATTTGCCTGG CGGCAGTAGC GCGGTGGTCC CACCTGACCC CATGCCGAAC 420

TCAGAAGTGA AACGCCGTAG CGCCGATGGT AGTGTGGGGT CTCCCCATGC GAGAGTAGGG 480

AACTGCCAGG CATCAAATTA AGCAGTAAGC CGGTCATAAA CCGGTGGTTG TAAAAGAATT 540

CGGTGGAGCG GTAGTTCAGT TGGTTAGAAT ACCTGCCTGT CACGCAGGGG GTCGCGGGTT 600

CGAGTCCCGT CCGTCCGCC ACTTATTAAG AGCCCTGAGC ATTAGCTCAG GGCTTTTTGT 660

CTATGGAAAA CCCCAGCTA GGCTGGGGGT TCCGGAAAGC TTTCAGCTTT AAGCCAGTTA 720

TTAAAACCCC TTTTGATTTG TTAAAACATC TTGCGGTCTG GCAACTGCAA AAGTTCAACA 780

AGAAATCAAA AGGGGGTCCC AATGGGGGAC GAAAAGAGCT TAGCGCACAC CCGATGGAAC 840

TGCAAATATC ACATAGTTTT CGCGCCCAA TACCGAAGAC AAGCGTTCTA TGGAGAGAAG 900

CGTAGGGCAG TAGGCAGCAT ATTAAGAAAA TTGTGTGAAT GGAAAAACGT ACGAATTCTG 960

GAAGCGGAAT GTTGTGCAGA TCATATTCAC ATGCTTCTGG AGATCCCGCC GAAGATGAGT 1020

GTGTCGAGCT TCATGGGATA TCTGAAGGGT AAAAGTAGTC TGATGCTTTA CGAGCAGTTT 1080

GGGGATCTAA AATTCAAATA CAGGAACAGG GAGTTCTGGT GCAGAGG 1127

>(6)C Typhimurium-IG-NC\_021820

ATGTTTTGGC GGATTGAGAA GACAACAATT TTCAGCTCAG ATTCAGAGTC CGAAGGATTT 60

TACGCTGAGA CAAGGCGGCA AACGCAGCGA CGGAAGGAGC ATACAGAAGT ATGTGACTGA 120

CGCTCGCAAG AGCAGCCAAC GCCGTATCAG TGTAAGAGAC ACAGAACGGA GCACAAAGAA 180

TTTGCCTGGC GGCAGTAGCG CGGTGGTCCC ACCTGACCCC ATGCCGAAC CAGAAGTGAA 240

ACGCCGTAGC GCCGATGGTA GTGTGGGGTC TCCCCATGCG AGAGTAGGGA ACTGCCAGGC 300

ATCAAATTAG AAGTATGGCA TTAACITTCG GGGCAGTTCA CTAICTGACA GAGAGTAGGA 360

CAAAGCGAA AGCTTTTGAA CGTTGCGAAG CAACGGCCCG AAGGGTGAAT CACGAAGTGA 420

TTCATAAACT GCCAGGCATC AAATTAAGCA GTAAACTGAT GTAAAAATCA GTGGTTGTAA 480

AAGAATTCGG TGGAGCGG 498

>(7)C Infantis\_NoNCBI match

ATGTTTTGGC GGTTGAGAAG ACGATTTTCA GCACTGATTC AGAGTTGAGT ACGCAATAAT 60

TTGCGCAGCA GCAAGGCGGC AAGCGAAGGA AAGGAAGGAG CATA CAGAAG TATGTGACTG 120

AGTTTACGAG CGCAGGCAAC GCCGCTGATG CGATAAAGAA TTGCGTACAG AGCATAAAAG 180

AATTTGCCTG GCGGCAGTAG CGCGGTGGTC CCACCTGACC CCATGCCGAA CTCAGAAGTG 240

AAACGCCGTA GCGCCGATGG TAGTGTGGGG TCTCCCATG CGAGAGTAGG GAACTGCCAG 300

GCATCAAATT AGAAGTATGG CATTAAC TTT CGGGGCAGTT CACTACTCGA CAGAGAGTAG 360

GACAAAAGCG AAAGCTTTTG AACGTTGCGA AGCAACGGCC CGAAGGGGGA ATCACGAAGT 420

GATTCATAAG CTGCCAGGCA TCAAATTGCA GTAAACCGGG ATGAAAATCC GGATTGTGAC 480

AAAGAAATTC GGTGGAGCGG 500

>(8)C Muenchen\_CP077691

ATGTTTTGGC GGTTGAGAGA CGATTTTCAG CACTGATTCC GGATTTTCGG GAACGAAAGA 60

TAAAAGATTC GTTTCCGGCA ACAGAATTTG CCTGGCGGCA CTAGCGCGGT GGTCCACCT 120

GACCCCATGC CGAACTCAGA AGTGAAACGC CGTAGCGCCG ATGGTAGTGT GGGGTCTCCC 180

CATGCGAGAG TAGGGAACTG CCAGGCATCA AATTAGAAGT ATGGCATTAA CTTTCGGGGC 240

AGTTCACTAC TCGACAGAGA GTAGGACAAA AGCGAAAGCT TTTGAACGTT GCGAAGCAAC 300

GGCCCGAAGG GTGAATCACG AAGTGATTCA TAAACTGCCA GGCATCAAAT TGCAGTAAAC 360

CGGGATGAAA ATCCGGGTTG TGACAAAGAA ATTCGGTGGA GCGG 404

>(9)C Enteritidis\_NoNCBImatch

ATGTTTTGGC GGATGAGAGA CGATTTTCAG CAGTGATTCA GAGTTGAGTA CGCAATAATT 60

TGCGCAGCAG CAAGGCGGCA AGCGAAGGAA AGGAAGGAGC ATACAGAAGT ATGTGACTGA 120

GTTTACGAGC GCAGGCAACG CCGCTGATGC GATAAAGAAT TCGGTACAGA GCACAAAGAA 180

TTTGCCTGGC GGCAGTAGCG CGGTGGTCCC ACCTGACCCC ATGCCGA ACT CAGAAGTGAA 240

ACGCCGTAGC GCCGATGGTA GTGTGGGGTC TCCCCATGCG AGAGTAGGGA ACTGCCAGGC 300

ATCAAATTAA GCAGTAAGCC GGTCATAGAC TGGTGGTTGT AAAAAAATTC GGTGGAGCGG 360

>(10)C Emek\_NoNCBImatch

ATGTTTTGGC GGATTGAGAA GACAACAATT TTCAGCTCAG ATTCAGAGTC CGAAGGATTT 60

TATGCTGAGA CAAGGCGGCA AACGCAGCGA CGGAAGGAGC ATACAGAAGT ATGTGACTGA 120

CGCTCGCAAG AGCAGCCAAC GCCGTATCAG TGTA AAAGAC ACAGGACAGA GCACAAAGAA 180

TTTGCCTGGC GGC ACTAGCG CGGTGGTCCC ACCTGACCCC ATGCCGA ACT CAGAAGTGAA 240

ACGCCGTAGC GCCGATGGTA GTGTGGGGTC TCCCCATGCG AGAGTAGGGA ACTGCCAGGC 300

ATCAAATTAG AAGTATGGCA TTAACITTCG GGGCAGTTCA CTAICTCGACA GAGAGTAGGA 360

CAAAAGCGAA AGCTTTTGAA CGTTGCGAAG CAACGGCCCG AAGGGTGAAT CACGAAGTGA 420

TTCATAAACT GCCAGGCATC AAATTGCAGT AAACCGGGAT GAAAATCCGG GTTGTGACAA 480

AGAAATTCGG TGGAGCGG

498

>(11)X Panama\_CP012346

AACTTGCCCC GAGATGAGTT CTCCTGAGA CTTTAGGTCT CCTGAAGGAA CGTTGAAGAC 60

GACAACGTTG ATAGGCCGGG TGTGTAAGCG CAGCGATGCG TTGAGCTAAC CGGTACTAAT 120

GAACCGTGAG GCTTAACCTT ACAACGCCGA AGATGTTTTG GCGGATGAGA GACGATTTTC 180

AGCACTGATT CAGAGTTGAG TACGCAATAA TTTGCGCAGC AGCAAGGCGG CAAGCGAAGG 240

AAAGGAAGGA GCATACAGAA GTATGTGACT GAGTTTACGA GCGCAGGCAA CGCCGCTGAT 300

GCGATAAAGA ATTGCGTACT GAGCATAAAA GAATTTGCCT GGCGGCACTA GCGCGGTGGT 360

CCCACCTGAC CCCATGCCGA ACTCAGAAGT GAAACGCCGT AGCGCCGATG GTAGTGTGGG 420

GTCTCCCAT GCGAGAGTAG GGAAGTCCA GGCATCAATT TAAGCAGTAA ACTGATGTAA 480

AAATCAGTGG TTGTAAAAGA ATTCGGTGGA GCGGTAGTTC AGTTGGTTAG AATACCTGCC 540



TGTCACGCAG GGGGTCGCGG GTTCGAGTCC CGTCCGTTCC GCCACTTATT AAGAGCCCTG 600

AGCATTAGCT CAGGGCTTTT TCTTGCCTG TCATTTAATT ATTGCTCAAT TCGCAAAAAT 660

CCTCTGCATT TTTCGCTCTT TTTCTACAAA GCGCTGAAGG TCATAATCCC CTCAGTTAAC 720

GAACATAGTG ATTA AAAAGA GGAATTCTAT GACTATCCCT GCATTCGGTT TAGGTACTTT 780

TCGCCTGAAA GACGACGTGG TTATCGCTTC TGTGAAAACG GCGCTTGAAC TGGGCTACCG 840

TACTGTCGAC ACTGCGCAGA TCTATGATAA TGAAGCGGCT GTTGGACAGG CGATTGCTGA 900

GAGCGGCGTA CCACGTAGCG AGCTGTACAT CACCACCAAG ATCTGGATTG AAAACCTTAG 960

CAAAGACAAA CTAATCCCAA GCCTGACAGA GAGCCTGAAA AACTGCGTA CCGATTATGT 1020

CGATCTGACG CTGATCCACT GGCCATCTCC GGGTGATGCC GTGTCTGTCA AAAATTATGC 1080

TGGCATTGCT GGAAGCTAAA AACAAGGCCT GACTCGCGAA ATGGCAT 1127

>(12)C Oranienburg\_NoNCBI match

ATGTTTTGGC GGTTGAGAGA CGATTTTCAG CACTGATTCA GAGTTGAGTA CGCAATAATT 60

TGCGCAGCAG CAAGGCGGCA AGCGAAGGAA AGGAAGGAGC ATACAGAAGT ATGTGACTGA 120

CTTTACGAGC GCAGGCAACG CCGCTGATGC GATAAAGAAT TGCGTACTGA GCATAAAAGA 180

ATTTGCCTGG CGGCAACAGC GCGGTGGTCC CACCTGACCC CATGCCGAAC TCAGAAGTGA 240

AACGCCGTAG CGCCGATGGT AGTGTGGGGT CTCCCATGC GAGAGTAGGG AACTGCCAGG 300

CATCAAATTA AGCAGTAAGC CGGTCATAAA CCGGTGGTTG TAAAAGAATT CGGTGGAGCG 360

G

361

>(13)X Schwarzengrund\_Bredeney\_Give\_CP085812\_CP082691\_CP019174

CATCGCTCAA CGGATAAAAG GTA CTCCGGG GATAACAGGC TGATACCGCC CAAGAGTTCA 60

TATCGACGGC GGTGTTTGGC ACCTCGATGT CGGCTCATCA CATCCTGGGG CTGAAGTAGG 120

TCCAAGGGT ATGGCTGTTT GCCATTTAAA GTGGTACGCG AGCTGGGTTT AGAACGTCGT 180

GAGACAGTTC GGTCCCTATC TGCCGTGGGC GCTGGAGAAC TGAGGGGGGC TGCTCCTAGT 240

ACGAGAGGAC CGGAGTGGAC GCATCACTGG TGTTCTGGGT GTCATGCCAA TGGCACTGCC 300

CGGTAGCTAA ATGCGGAAGA GATAAGTGCT GAAAGCATCT AAGCACGAAA CTTGCCCCGA 360

GATGAGTTCT CCCTGAGACT TAGAGTCTCC TGAAGGAACG TTGAAGACGA CGACGTTGAT 420

AGGCCGGGTG TGTAAGCGCA GCGATGCGTT GAGCTAACCG GTACTAATGA ACCGTGAGGC 480

TTAACCTTAC AACGCCGAAG ATGTTTTGGC GGTGAGAAG ACAACAATTT TCAGCTCAGA 540

TTCAGAGTTG AGTACGCAAT AATTTGCGCA GCAGCAAGGC GGCAAGCGAA GGAAAGGAAG 600

GAGCATAACAG AAGTATGTGA CTGACTTTAC GAGCGCAGGC AACGCCGCTG ATGCGATAAA 660

GAATTGCGTA CTGAGCATAA AAGAATTTGC CTGGCGGCAC TAGCGCGGTG GTCCACCTG 720

ACCCCATGCC GAACTCAGAA GTGAAACGCC GTAGCGCCGA TGGTAGTGTG GGGTCTCCCC 780

ATGCGAGAGT AGGGAAGTGC CAGGCATCAA ATTAAGCAGT AAGCCGGTCA TAAACCGGTG 840

GTTGTAAAAG AATCCGGTGG AGCGGTAGTT CAGTTGGTTA GAATACCTGC CTGTCACGCA 900

GGGGGTCGCG GGTTGAGTC CCGTCCGTTT CGCCACTTAT TAAGAGCCCT GAGCATTAGC 960

TCAGGGCTTT TTCTTGCCT GTCATTTAAT TATTGCTCAA TTCGCAAAA TCCTCTGCAT 1020

TTCTCGCTCT TTTTCTACAA AGCGCTGAAG GTCATAATCC CCTCAGTTAA CGAACATAGT 1080

GATTA AAAAG AGGAATTCTA TGA CTATCCC TGCATTCGGT TTAGG TACTT TTCGCCTGAA 1140

AGACGACGTG GTTATCGCTT CTGTGAAAAC GGCGCTTGAA CTGGGCTACC GTGCTGTGCGA 1200

CACTGCGCAA ATCTATGATA ATGAAGTTGC TGTTGGACAG GCGATTGCTG AGAGCGGCGT 1260

ACCGCGTAAT GAGCTGTACA TCACCACTAA GATCTGGATT GAAAACCTTA GCAAAGACAA 1320

GCTGATCCCA AGCCTGAAAG AGAGCCTGAA AAAACTGCGT ACCGA 1365

>(14)X Bovismorbificans\_CP073715

CGGAAGAGAT AAGTGCTGAA AGCATCTAAG CACGAACTT GCCCCGAGAT GAGTTCTCCC 60

TGAGACTTTA GGTCTCCTGA AGGAACGTTG AAGACGACGA CGTTGATAGG CCGGGTGTGT 120

AAGCGCAGCG ATGCGTTGAG CTAACCGGTA CTAATGAACC GTGAGGCTTA ACCTTACAAC 180

GCCGAAGATG TTTTGCGGGT TGAGAGATGA TTTTCAGCAC TGATTCCGGA TTTTCGGGAA 240

CGAAAGATTT TACGCTGAGG CAAGGCGGCA AATGAAGGAA AGGAAGGAGC ATACAGAAGT 300

ATGTGACTGA CTTTACGAAT GCAGCCAACG CAGCATCGGT GTAAAAGATT CGTTTCCGGC 360

AACAGAATTT GCCTGGCGGC CGTAGCGCGG TGGTCCCACC TGACCCCATG CCGAACTCAG 420

AAGTGAAACG CCGTAGCGCC GATGGTAGTG TGGGGTCTCC CCATGCGAGA GTAGGGAAC 480

GCCAGGCATC AATTTAAGCA GTAAACTGAT GTAAAAATCA GTGGTTGTAA AAAAATTCGG 540

TGGAGCGGTA GTTCAGTTGG TTAGAATACC TGCCTGTCAC GCAGGGGGTC GCGGGTTCGA 600

GTCCCGTCCG TTCCGCCACT TATTAAGAGC CCTGAGCATT AGCTCAGGGC TTTTCTTTG 660

CCTGTCATTT AATTATTGCT CAATTCGCAA AAATCCTCTG CATTCTCGC TCTTTTCTA 720

CAAAGCGCTG AAGGTCATAA TCCCCTCAGT TAACGAACAT AGTGATTAAA AAGAGGAATT 780

STATGACTAT CCCTGCATTC GGTTTAGGTA CTTTTCGCCT GAAAGACGAC GTGGTTATCG 840

CTTCTGTAA AGCGGCGCTT GAACTAGGCT ACCGTGCTGT CGACACTGCG CAAATCTATG 900

ATAATGAAGC GGCTGTTGGA CAGGCGATTG CTGAGAGCGG CGTACCGCGT AATGAGCTGT 960

ACATCACCAC CAAGATCTGG ATTGAAAACC TTAGCAAAGA CAAGCTAATC CCAAGCCTGA 1020

AAGAGAGCCT GAAAAAACTG CGTACCGATT ATGTCGATCT GACTGATC CACTGGCCAT 1080

CTCCGGGTGA TGCCGTGCCT GTCGAAGAAT TTATGCAGGC TTGCTGGAAG CTAAAAACAA 1140

GGCTGACTCG CGAATTGGCT CTCAACTTCA CATTCCGTGA TGGAAAGGTA TTGCCGCGGG 1200

GGCGCAGACA TATCGCACCA ACAGATGAGC TTCTCCGATT GCAATC 1246

>(15)C Gallinarum\_pullorum\_CP074215

ATGTTTTGGC GGATGAGAGA CGATTTTCAG CAGTGATTCA GAGTTGAGTA CGCAATAATT 60

TGCGCAGCAG CAAGGCGGCA AGCGAAGGAA AGGAAGGAGC ATACAGAAGT ATGTGACTGA 120

GTTTACGAGC GCAGGCAACG CCGCTGATGC GATAAAGAAT TTGCGTACAG AGCACAAAGA 180

ATTTGCCTGG CGGCAGTAGC GCGGTGGTCC CACCTGACCC CATGCCGAAC TCAGAAGTGA 240

AACGCCGTAG CGCCGATGGT AGTGTGGGGT CTCCCCATGC GAGAGTAGGG AACTGCCAGG 300

CATCAAATAA AACGAAGGGC CCTGTGCGAA GACAGGGCCT TTTGTTTTAT CTGTAGTCTG 360

TCGGTGAGCA CTCTCCTGAG GAGGAGAAAT CCGCCGGGAG CGGATTTGAA CGTTGCGCAG 420

CAACGGCCCC TAGGGTGGCG GGCAGGACGC CCGCCATAAA CTGCCAGGCA TCAAATTGCA 480

GTAAACCGGG ATGAAAATCC GGGTTGTGAC AAAGAAATTC GGTGGAGCGG 530

>(16)C Choleraesuis\_CP074231

ATGTTTTGGC GGTTGAGAGA TGATTTTCAG CACTGATTCC GGATTTTCGG GAACGAAAGA 60

TTTTACGCTG AGGCAAGGCG GCAAATGAAG GAAAGGAAGG AGCATACTGA AGTATGTGAC 120

TGACTTTGCG AATGCAGCCA ACGCAGCATC GGTGTAAAAG ATTCGTTTCT GGCAACAGAA 180

TTTGCCTGGC GGCCGTAGCG CGGTGGTCCC ACCTGACCCC ATGCCGA ACT CAGAAGTGAA 240

ACGCCGTAGC GCCGATGGTA GTGTGGGGTC TCCCATGCG AGAGTAGGGA ACTGCCAGGC 300

ATCAAATTAA GCAGTAAACT GATGTAAAAG TCAGTGGTTG TAAAAGAATT CGGTGGAGCG 360

G 361

>(17)C Choleraesuis\_NoNCBI match

ATGTTTTGGC GGATGAGAGA CGATTTTCAG CACTGATTCA GAGTTGAGTA CGCAATAATT 60

TGCGCAGCAG CAAGGCGGCA AGCGAAGGAA AGGCAGGAGC ATACAGAAGT ATGTGACTGA 120

GTTTACGAGC GCAGGCAACG CCGCTGATGC GATAAAGAAT TCGGTACAGA GCACAAAGAA 180

TTTGCCTGGC GGCCTAGCG CGGTGGTCCC ACCTGACCCC ATGCCGA ACT CAGAAGTGAA 240

ACGCCGTAGC GCCGATGGTA GTGTGGGGTC TCCCATGCG AGAGTAGGGA ACTGCCAGGC 300

ATCAAATTAG AAGTATGGCA TTAACITTCG GGGCAGTTCA CTAICTGACA GAGAGTAGGA 360

CAAAAGCGAA AGCTITTTGAA CGTTGCGAAG CAACGGCCCG AAGGGTGAAT CACGAAGTGA 420

TTCATAAACT GCCAGGCATC AAATTAAGCA GTAAACTGAT GTAAAAATCA GTGGTTGTAA 480

AAGAATTCGG TGGAGCGG

498

>(18)C Paratyphi\_B\_CP074611

ATGTTTTGGC GGTTGAGAAG ACGATTTTCA GCAGTGATTC AGAGTTGAGT ACGCAATAAT 60

TTGCGCAGCA GCAAGGCGGC AAGCGAAGGA AAGGAAGGAG CATAACAGAAG TATGTGACTG 120

AGTTTACGAG CGCAGGCAAC GCCGCTGATG CGATAAAGAA TTGCGTACAG AGCACAAAGA 180

ATTTGCCTGG CGGCACTAGC GCGGTGGTCC CACCTGACCC CATGCCGAAC TCAGAAGTGA 240

AACGCCGTAG CGCCGATGGT AGTGTGGGGT CTCCCATGC GAGAGTAGGG AACTGCCAGG 300

CATCAAATTA GAAGTATGGC ATTAACITTC GGGGCAGTTC ACTACTCGAC AGAGAGTAGG 360

ACAAAAGCGA AAGCTITTTGA ACGTTGCGAA GCAACGGCCC GAAGGGTGAAT TCACGAAGTG 420

ATTCATAAAC TGCCAGGCAT CAAATTAAGC AGTAAACTGA TGAAAAATC AGTGGTTGTAA 480

AAAGAATTCG GTGGAGCGG

499

>(19)C Dublin\_NoNCBImatch

ATGTTTTGGC GGATGAGAGA CGATTTTCAG CACTGATTCA GAGTTGAGTA CGCAATAATT 60

TGCGCAGCAG CAAGGCGGCA AGCGAAGGAA AGGAAGGAGC ATACAGAAGT ATGTGACTGA 120

GTTTACGAGC GCAGGCAACG CAGCGGATGC GATAAAGAAT TGCGTACAGA GCACAAAGAA 180

TTTGCCTGGC GGCCTAGCG CGGTGGTCCC ACCTGACCCC ATGCCGA ACT CAGAAGTGAA 240

ACGCCGTAGC GCCGATGGTA GTGTGGGGTC TCCCATGCG AGAGTAGGGA ACTGCCAGGC 300

ATCAAATTAG AAGTATGGCA TTAAC TTTTCG GGGCAGTTCA C TACTCGACA GAGAGTAGGA 360

CAAAAGCGAA AGCTTTTGAA CGTTGCGAAG CAACGGCCCG AAGGGTGAAT CACGAAGTGA 420

TTCATAAACT GCCAGGCATC AAATTGCAGT AAACCGGGAT GAAAATCCGG GTTGTGACAA 480

AGAAATTCGG TGGAGCGG

498

>(20)C Paratyphi\_B\_CP074222

ATGTTTTGGC GGATGAGAGA CGATTTTCAG CACTGATTCA GAGTTGAGTA CGCAATAATT 60

TACGCAGCAG CAAGGCGGCA AGCGAAGGAA AGGAAGGAGC ATACAGAAGT ATGTGACTGA 120

GTTTACGAGC GCAGGCAACG CAGCGGATGC GATAAAGAAT TGCGTACAGA GCACAAAGAA 180



TTTGCCTGGC GGCCTAGCG CGGTGGTCCC ACCTGACCCC ATGCCGAACT CAGAAGTGAA 240

ACGCCGTAGC GCCGATGGTA GTGTGGGGTC TCCCCATGCG AGAGTAGGGA ACTGCCAGGC 300

ATCAAATTAG AAGTATGGCA TTAACITTCG GGGCAGTTCA CTAICTGACA GAGAGTAGGA 360

CAAAAGCGAA AGCTITTTGAA CGTTGCGAAG CAACGGCCCCG AAGGGTGAAT CACGAAGTGA 420

TTCATAAACT GCCAGGCATC AAATTGCAGT AAACCGGGAT GAAAATCCGG GTTGTGACAA 480

AGAAATTCGG TGGAGCGG

498

>(21)C Typhimurium\_CP040458

ATGTTTTGGC GGTTGAGAGA CGATTTTCAG CACTGATTCA GATTACATCA GAACGTAAAA 60

ACGGTCTGAT AACAGAATTT GCCTGGCGGC ACTAGCGCGG TGGTCCCACC TGACCCCATG 120

CCGAACTCAG AAGTGAAACG CCGTAGCGCC GATGGTAGTG TGGGGTCTCC CCATGCGAGA 180

GTAGGGAICT GCCAGGCATC AAATTAGAAG TATGGCATTACTTTTCGGGG CAGTTCACTA 240

CTCGACAGAG AGTAGGACAA AAGCGAAAGC TTTTGAACGT TGCGAAGCAA CGGCCCGAAG 300

GGTGAATCAC GAAGTGATTCTATAACTGCC AGGCATCAAA TTAAGCAGTAACTGATGTA 360

AAAATCAGTG GTTGTAAAAG AATTCGGTGG AGCGG

395

>(22)C Paratyphi-B\_CP074225

ATGTTTTGGC GGTGAGAGA AGATTTTCAG CACGATTCAG AGTTGAGTAC GCAATAATTT 60

GCGCAGCAGC AAGCGAAGGA AAGGAAGGAG CATAACAGAAG TATGTGACTG ACTTTACGAG 120

CGCAGGCAAC GCCGCTGATG CGATAAAGAA TTGCGTACTG AGCACAAAGA ATTTGCCTGG 180

CGGCACTAGC GCGGTGGTCC CACCTGACCC CATGCCGAAC TCAGAAGTGA AACGCCGTAG 240

CGCCGATGGT AGTGTGGGGT CTCCCATGC GAGAGTAGGG AACTGCCAGG CATCAAATTA 300

GAAGTATGGC ATTAACCTTC GGGGCAGTTC ACTACTCGAC AGAGAGTAGG ACAAAGCGA 360

AAGCTTTTGA ACGTTGCGAA GCAACGGCCC GAAGGGTGAA TCACGAAGTG ATTCATAAAC 420

TGCCAGGCAT CAAATTAAGC AGTAAACTGA TGTA AAAATC AGTGGTTGTA AAAGAATTCG 480

GTGGAGCGG

489

>(23)C Yovokome\_CP019418

ATGTTTTGGC GGTGAGAAG ACGATTTTCA GCACTGATTC AGATTACATC AGAACGTAAA 60

AACGGTCTGA TAACAGAATT TGCCTGGCGG CACTAGCGCG GTGGTCCCAC CTGACCCCAT 120

GCCGAACTCA GAAGTGAAAC GCCGTAGCGC CGATGGTAGT GTGGGGTCTC CCCATGCGAG 180

AGTAGGGAAC TGCCAGGCAT CAAATTAGAA GTATGGCATT AACTTTCGGG GCAGTTCACT 240

ACTCGACAGA GAGTAGGACA AAAGCGAAAG CTTTTGAACG TTGCGAAGCA ACGGCCCGAA 300

GGGTGAATCA CGAAGTGATT CATAAACTGC CAGGCATCAA ATTAAGCAGT AACTGATGT 360

AAAAATCAGT GGTTGTAAAA GAATTCGGTG GAGCGG 396

>(24)C Newport\_CP025232

CTGTTTTGGC GGATGAGAGA CGATTTTCAG CTCAGATTCA GATTACATCA GAACGTAAAA 60

ACGGTCTGAT AACAGAATTT GCCTGGCGGC ACTAGCGCGG TGGTCCCACC TGACCCCATG 120

CCGAACTCAG AAGTGAAACG CCGTAGCGCC GATGGTAGTG TGGGGTCTCC CCATGCGAGA 180

GTAGGGAAC GCCAGGCATC AAATTAGAAG TATGGCATT ACTTTCGGGG CAGTTCACTA 240

CTCGACAGAG AGTAGGACAA AAGCGAAAGC TTTTGAACGT TGCGAAGCAA CGGCCCGAAG 300

GGTGAATCAC GAAGTGATTC ATAAACTGCC AGGCATCAAA TTAAGCAGTA AACTGATGTA 360

AAAATCAGTG GTTGTAAG AATTCGGTGG AGCGG 395

>(25)X Tennessee\_Montevideo\_CP007505\_CP030029

CGGAAGAGAT AAGTGCTGAA AGCATCTAAG CACGAACTT GCCCCGAGAT GAGTTCTCCC 60

TGAGACTTAG AGTCTCTGA AGGAACGTTG AAGACGACGA CGTTGATAGG CCGGGTGTGT 120

AAGCGCAGCG ATGCGTTGAG CTAACCGGTA CTAATGAACC GTGAGGCTTA ACCTTACAAC 180

GCCGAAGATG TTTTGCGGA TGAGAGACGA TTTTCAGCAC TGATTCAGAT TACATCAGAA 240

CGTAAAAACG GTCTGATAAC AGAATTTGCC TGGCGGCCGT AGCGCGGTGG TCCCACCTGA 300

CCCCATGCCG AACTCAGAAG TGAAACGCCG TAGCGCCGAT GGTAGTGTGG GGTCTCCCCA 360

TGCGAGAGTA GGGAACTGCC AGGCATCAAA TTAAGCAGTA AACTGATGTA AAAATCAGTG 420

GTTGTAAAAG AATTCGGTGG AGCGGTAGTT CAGTTGGTTA GAATACCTGC CTGTCACGCA 480

GGGGGTCGCG GGTTGAGTC CCGTCCGTTT CGCCACTTAT TAAGAGCCCT GAGCATTAGC 540

TCAGGGCTTT TTCTTTCAT GTCATTTAAT TATTGCTCAA TTCGCAAAAA TCCTCTGCAT 600

TTCTCGCTCT TTTTCTGCAA AGCGCTGAAG GTCATAATCC CCTCAGTTAA CGAACATAGT 660

GATTA AAAAG AGGAATTCTA TGA CTATCCC TGCATTCGGT TTAGG TACTT TTCGCCTGAA 720

AGACGACGTG GTTATCGCTT CTGTTAAAAC GGCGCTTGAA CTGGGCTACC GTGCTGTCTGA 780

CACTGCACAG ATCTATGATA ATGAAGCGGC TGTTGGACAG GCGATTGCTG AAAGCGGTGT 840

ACCACGTAAT GAGCTGTACA TCACCACCAA GATCTGGATT GAAAACCTTA GCAAAGACAA 900

GCTAATCCCA AGCCTGAAAG AGAGCCTGAA AAAACTGCGT ACCGATTATG TCGATCTGAC 960

GCTGATCCAC TGGCCATCTC CGGGTGATGC CGTGTCTGTC GAAGAATTTA TGCAGGCATT 1020

GCTGGAAGCT AAAAAACAAG GGCTGACTCG CGAAATTGGC ATTTCAAAC TCACCATTCC 1080

GTTGATGGAA AAGGCTATTG CCGCGGTGGG CGCAGACCAT ATCGCCACCA ACCAGATTGA 1140

GCTATCTCCG TATCTGCAGA ATCGT 1165

>(26)C Fresno\_noNCBImatch

ATGTTTTGGC GGATGAGAAG ACGATTTTCA GCTCAGATTC AGAGTCCGAA GGATTTTACG 60

CTGAGACAAG GCGGCAAACG CAGCGACGGA AGGAGCATA CAGAAGTATGT GACTGACGCT 120

CGCAAGAGCA GCCAACGCCG TATCAGTGTA AAAGACACAG GACAGAGCAC AAAGAATTTG 180

CCTGGCGGCA CTAGCGCGGT GGTCCACCT GACCCCATGC CGAACTCAGA AGTGAAACGC 240

CGTAGCGCCG ATGGTAGTGT GGGGTCTCCC CATGCGAGAG TAGGGAAGT CCAGGCATCA 300

AATTAGAAGT ATGGCATTAA CTTTCGGGGC AGTTCACACTAC TCGACAGAGA GTAGGACAAA 360

AGCGAAAGCT TTTGAACGTT GCGAAGCAAC GGCCCGAAGG GTGAATCACG AAGTGATTCA 420

TAAACTGCCA GGCATCAAAT TAAGCAGTAA GCCGGTCATA GATCGGTGGT TGTAAGAA 480

TTCGGTGGAG CGG 493

>(27)C Worthington\_CP039509

ATGTTTTGGC GGATGAGAAG ACGATTTTCA GCACTGATTC CGGATTTTCG GGAACGAAAG 60

ATAAAAGATT CGTTTCCGGC AACAGAATTT GCCTGGCGGC ACTAGCGCGG TGGTCCCACC 120

TGACCCCATG CCGAACTCAG AAGTGAAACG CCGTAGCGCC GATGGTAGTG TGGGGTCTCC 180

CCATGCGAGA GTAGGGAAC GCCAGGCATC AAATTAAGCA GTAAACTGAT GTAAAAATCA 240

GTGGTTGTAA AAGAATTCGG TGGAGCGG 268

>(28)C Anatum\_noNCBImatch

ATGTTTTGGC GGATTGAGAA GACAACAATT TTCAGCTCAG ATTCAGAGTC CGAAGGATT 60

TACGCTGAGA CAAGGCGGCA AACGCAGCGA CGGAAGGAGC ATACAGAAGT ATGTGACTGA 120

CGCTCGCAAG AGCAGCCAAC GCCGTATCAG TGTAAGAGAC ACAGGACAGA GCACAAAGAA 180

TTTGCTGGC GGCCTAGCG CGGTGGTCCC ACCTGACCCC ATGCCGAAC CAGAAGTGAA 240

ACGCCGTAGC GCCGATGGTA GTGTGGGGTC TCCCATGCG AGAGTAGGGA ACTGCCAGGC 300

ATCAAATTAG AAGTATGGCA TTAACCTTCG GGGCAGTTCA CTA CTGACA GAGAGTAGGA 360

CAAAAGCGAA AGCTTTTGAA CGTTGCGAAG CAACGGCCCG AAGGGTGAAT CACGAAGTGA 420

TTCATAAACT GCCAGGCATC AAATTAAGCA GTAAACTTGA TGTA AAAATC AGTGGTTGTA 480

AAAGAATTCG GTGGAGCGG 499

>(29)C Derby\_CP026609

ATGTTTTGGC GGATGAGAGA CGATTTTCAG CAGTGATTCA GAGTTGAGTA CGCAATGATT 60

TGCGCAGCAG CAAGGCGGCA AGCGAAGGAA AGGAAGGAGC ATACTGAAGT ATGTGACTGA 120

CTTTACGAGC GCAGGCAACG CCGCTGATGC GATAAAGAAT TGCGTACAGA GCACAAAGAA 180

TTTGCCTGGC GGCCGTAGCG CGGTGGTCCC ACCTGACCCC ATGCCGAACT CAGAAGTGAA 240

ACGCCGTAGC GCCGATGGTA GTGTGGGGTC TCCCATGCG AGAGTAGGGA ACTGCCAGGC 300

ATCAAATTAG AAGTATGGCA TTAACITTCG GGGCAGTTCA CTAICTGACA GAGAGTAGGA 360

CAAAAGCGAA AGCTTTTGAA CGTTGCGAAG CAACGGCCCG AAGGGTGAAT CACGAAGTGA 420

TTCATAAACT GCCAGGCATC AAATTAAGCA GTAAACTGAT GTAAAAATCA GTGGTTGTAA 480

AAGAATTCGG TGGAGCGG

498

>(30)C Infantis\_noNCBI match

ATGTTTTGGC GGTTGAGAGA TGATTTTCAG CACTGATTCA GAGTTGAGTA CGCAATAATT 60

TGCGCAGCAG CAAGGCGGCA AGCGAAGGAA AGGAAGGAGC ATACAGAAGT ATGTGACTGA 120

CTTTACGAGC GCAGGCAACG CCGCTGATGC GATAAAGAAT TGCGTACTGA GCATAAAAGA 180

ATTTGCCTGG CGGCACTAGC GCGGTGGTCC CACCTGACCC CATGCCGAAC TCAGAAGTGA 240

AACGCCGTAG CGCCGATGGT AGTGTGGGGT CTCCCATGC GAGAGTAGGG AACTGCCAGG 300

CATCAAATTA GAAGTATGGC ATTAAC TTTC GGGGCAGTTC ACTACTCGAC AGAGAGTAGG 360

ACAAAAGCGA AAGCTTTTGA ACGTTGCGAA GCAACGGCCC GAAGGGTGAA TCACGAAGTG 420

ATTCATAAAC TGCCAGGCAT CAATTTAAGC AGTAACTGA TGTA AAAATC AGTGGTTGTA 480

AAAGAATTCG GTGGAGCGG 499

>(31)C Paratyphi-B\_CP074221

ATGTTTTGGC GGATGAGAGA CGATTTTCAG CACTGATTCA GAGTTGAGTA CGCAATAATT 60

TGCGCAGCAG CAAGGCGGCA AGCGAAGGAA AGGAAGGAGC ATACAGAAGT ATGTGACTGA 120

GTTTACGAGC GCAGGCAACG CCGCTGATGC GATAAAGAAT TCGTACTGA GCATAAAAGA 180

ATTTGCCTGG CGGCCGTAGC GCGGTGGTCC CACCTGACCC CATGCCGAAC TCAGAAGTGA 240

AACGCCGTAG CGCCGATGGT AGTGTGGGGT CTCCCATGC GAGAGTAGGG AACTGCCAGG 300

CATCAAATTA GAAGTATGGC ATTAAC TTTC GGGGCAGTTC ACTACTCGAC AGAGAGTAGG 360

ACAAAAGCGA AAGCTTTTGA ACGTTGCGAA GCAACGGCCC GAAGGGTGAA TCACGAAGTG 420

ATTCATAAAC TGCCAGGCAT CAAATTAAGC AGTAACTGA TGTA AAAATC AGTGGTTGTA 480



AAAGAATTCG GTGGAGCGG

499

>(32)C Derby\_CP022494

ATGTTTTGGC GGATGAGAGA CGATTTTCAG CACTGATTCA GAGTTGAGTA CGCAATAATT 60

TGCGCAGCAG CAAGGCGGCA AGCGAAGGAA AGGAAGGAGC ATACAGAAGT ATGTGACTGA 120

CTTTACGAGC GCAGGCAACG CCGCTGATGC GATAAAGAAT TCGGTACAGA GCACAAAGAA 180

TTTGCCTGGC GGCCGTAGCG CGGTGGTCCC ACCTGACCCC ATGCCGA ACT CAGAAGTGAA 240

ACGCCGTAGC GCCGATGGTA GTGTGGGGTC TCCCATGCG AGAGTAGGGA ACTGCCAGGC 300

ATCAAATTAG AAGTATGGCA TTAACITTCG GGGCAGTTCA CTA CTGACA GAGAGTAGGA 360

CAAAAGCGAA AGCTTTTGAA CGTTGCGAAG CAACGGCCCG AAGGGTGAAT CACGAAGTGA 420

TTCATAAACT GCCAGGCATC AAATTAAGCA GTAAACTGAT GTAAAAATCA GTGGTTGTAA 480

AAGAATTCGG TGGAGCGG

498

>(33)X Derby\_California\_CP08267\_CP028900

TGCGGAAGAG ATAAGTGCTG AAAGCATCTA AGCACGAAAC TTGCCCGAG ATGAGTTCTC 60

CCTGAGACTT AGAGTCTCCT GAAGGAACGT TGAAGACGAC GACGTTGATA GGCCGGGTGT 120

GTAAGCGCAG CGATGCGTTG AGCTAACCGG TACTAATGAA CCGTGAGGCT TAACCTTACA 180

ACGCCGAAGA TGTTTTGGCG GTTGAGAGAC GATTTTCAGC AGTGATTCAG AGTTGAGTAC 240

GCAATAATTT GCGCAGCAGC AAGGCGGCAA GCGAAGGAAA GGAAGGAGCA TACAGAAGTA 300

TGTGACTGAC TTTACGAGCG CAGGCAACGC CGCTGATGCG ATAAAGAATT GCGTACAGAG 360

CACAAAGAAT TTGCCTGGCG GCAGTAGCGC GGTGGTCCCA CCTGACCCCA TGCCGAACTC 420

AGAAGTGAAA CGCCGTAGCG CCGATGGTAG TGTGGGGTCT CCCCATGCGA GAGTAGGGAA 480

CTGCCAGGCA TCAAATTAGA AGTATGGCAT TAACTTTCGG GGCAGTTCAC TACTCGACAG 540

AGAGTAGGAC AAAAGCGAAA GCTTTTGAAC GTTGCGAAGC AACGGCCCGA AGGGTGAATC 600

ACGAAGTGAT TCATAAACTG CCAGGCATCA AATTGCAGTA AACCGGGATG AAAATCCGGG 660

TTGTGACAAA GAAATTCGGT GGAGCGGTAG TTCAGTTGGT TAGAATACCT GCCTGTCACG 720

CAGGGGGTCG CGGGTTCGAG TCCCGTCCGT TCCGCCACTT ATTAAGAGCC CTGAGCATT A 780

GCTCAGGGCT TTTTCTTTCG ATGTCATTTA ATTATTGCTC AATTCGCAAA AATCCTCTGC 840

ATTTCTCGCT CTTTTTCTGC AAAGCGCTGA AGGTCATAAT CCCCTCAGTT AACGAACATA 900

GTGATTAATA AGAGGAATTC TATGACTATC CCTGCATTCG GTTTAGGTAC TTTTCGCCTG 960

AAAGACGACG TGGTTATCGC TTCTGTAAAA ACGGCGCTTG AACTAGGCTA CCGTGCTGTC 1020

GACACTGCGC AAATCTATGA TAATGAAGCG GCTGTTGGAC AGGCGATTGC TGAGAGCGGC 1080

GTACCGCGTA ATGAGCTGTA CATCACCACC AAGATCTGGA TTGAAAACCT TAGCAAAGAC 1140

AGCTAATCCC AGCCTGAAAG AGAGCCTGAA AAAGTGCCTA CCGATATGTC GATCTGAG 1198

>(34)C Newport\_CP015924

ATGTTTTGGC GGATGAGAGA AGATTTTCAG CACTGATTCA GAGTTGAGTA CGCAATAATT 60

TGCGCAGCAG CAAGGCGGCA AGCGAAGGAA AGGAAGGAGC ATACAGAAGT ATGTGACTGA 120

CTTTACGAGC GCAGGCAACG CCGCTGATGC GATAAAGAAT TCGGTACAGA GCACAAAAGA 180

ATTTGCCTGG CGGCACTAGC GCGGTGGTCC CACCTGACCC CATGCCGAAC TCAGAAGTGA 240

AACGCCGTAG CGCCGATGGT AGTGTGGGGT CTCCCCATGC GAGAGTAGGG AACTGCCAGG 300

CATCAAATTA GAAGTATGGC ATTAACCTTC GGGGCAGTTC ACTACTCGAC AGAGAGTAGG 360

ACAAAAGCGA AAGCTTTTGA ACGTTGCGAA GCAACGGCCC GAAGGGTGAA TCACGAAGTG 420

ATTCATAAAC TGCCAGGCAT CAAATTGCAG TAAACCGGGA TGAAAATCCG GGTTGTGACA 480

AAGAAATTCG GTGGAGCGG

499

>(35)C Kentucky\_CP026327

ATGTTTTGGC GGATGAGAGA AGATTTTCAG CACTGATTCA GAGTTGAGTA CGCAATAATT 60

TGCGCAGCAG CAAGGCGGCA AGCGAAGGAA AGGAAGGAGC ATACAGAAGT ATGTGACTGA 120

GTTTACGAGC GCAGGCAACG CCGCTGATGC GATAAAGAAT TGCCTACTGA GCACAAAAGA 180

ATTTGCCTGG CGGCACTAGC GCGGTGGTCC CACCTGACCC CATGCCGAAC TCAGAAGTGA 240

AACGCCGTAG CGCCGATGGT AGTGTGGGGT CTCCCCATGC GAGAGTAGGG AACTGCCAGG 300

CATCAAATTA GAAGTATGGC ATTAACCTTC GGGGCAGTTC ACTACTCGAC AGAGAGTAGG 360

ACAAAAGCGA AAGCTTTTGA ACGTTGCGAA GCAACGGCCC GAAGGGTGAA TCACGAAGTG 420

ATTCATAAAC TGCCAGGCAT CAAATTGCAG TAAACCGGGA TGAAAATCCG GGTGTGACA 480

AAGAAATTCG GTGGAGCGG

499

>(36)C Paratyphi-B\_CP074221

ATGTTTTGGC GGTTAAGAGA AGATTTTCAG CACTGATTCA GATTACATCA GAACGTAAAA 60

ACGGTCTGAT AACAGAATTT GCCTGGCGGC ACTAGCGCGG TGGTCCCACC TGACCCCATG 120

CCGAACTCAG AAGTGAAACG CCGTAGCGCC GATGGTAGTG TGGGGTCTCC CCATGCGAGA 180

GTAGGGAAC TCCAGGCATC AAATTAGAAG TATGGCATT ACTTTCTGGG CAGTTCACTA 240

CTCGACAGAG AGTAGGACAA AAGCGAAAGC TTTTGAACGT TGCGAAGCAA CGGCCCGAAG 300

GGTGAATCAC GAAGTGATTC ATAACTGCC AGGCATCAAA TTAAGCAGTA AACTGATGTA 360

AAAATCAGTG GTTGATAAAG AATTCGGTGG AGCGG 395

>(37)X Mbandaka\_Lubbock\_Typhimurium\_CP033343\_CP032814\_CP011365

AGAGATAAGT GCTGAAAGCA TCTAAGCACG AAAGTTGCC CGAGATGAGT TCTCCCTGAG 60

ACTTAGAGTC TCCTGAAGGA ACGTTGAAGA CGACGACGTT GATAGGCCGG GTGTGTAAGC 120

GCAGCGATGC GTTGAGCTAA CCGGTACTAA TGAACCGTGA GGCTTAACCT TACAACGCCG 180

AAGATGTTTT GGCGGTTGAG AGAAGATTTT CAGCACTGAT TCAGAGTTGA GTATGCAATA 240

ATTTGCGCAG CAGCAAGGCG GCAAGCGAAG GAAAGGAAGG AGCATAACAG AGTATGTGAC 300

TGACTTTACG AGCGCAGGCA ACGCCGCTGA TCGGATAAAG AATTGCGTAC AGAGCACAAA 360

AGAATTTGCC TGGCGGCCGT AGCGCGGTGG TCCCACCTGA CCCCATGCCG AACTCAGAAG 420

TGAAACGCCG TAGCGCCGAT GGTAGTGTGG GGTCTCCCA TCGGAGAGTA GGGAAGTCC 480

AGGCATCAAA TTAGAAGTAT GGCATTAAGT TTCGGGGCAG TTCCTACTC GACAGAGAGT 540

AGAACAAAAG CGAAAGCTTT TGAACGTTGC GAAGCAACGG CCCGAAGGGT GAATCACGAA 600

GTGATTCATA AACTGCCAGG CATCAAATTG CAGTAAACCG GGATGAAAAT CCGGGTTGTG 660

ACAAAGAAAT TCGGTGGAGC GGTAGTTCAG TTGGTTAGAA TACCTGCCTG TCACGCAGGG 720

GGTCGCGGGT TCGAGTCCCG TCCGTTCCGC CACTTATTA GAGCCCTGAG CATTAGCTCA 780

GGGCTTTTTT TTTGCATGTC ATTTAATTAT TGCTCAATTC GCAAAAATCC TCTGCATGTC 840

TCGCTCTTTT TCTGCAAAGC GCTGAAGGTC ATAATCCCCT CAGTTAACGA ACATAGTGAT 900

TAAAAAGAGG AATTCTATGA CTATCCCTGC ATTCGGTTTA GGTACTTTTC GCCTGAAAGA 960

CGACGTGGTT ATCGCTTCTG TGAAAACGGC GCTTGAACTG GGCTACCGTG CTGTCGACAC 1020

TGCGCAAATC TATGATAATG AAGCGGCTGT TGGACAGGCG ATTGCTGAGA GCGGTGTACC 1080

CGGTAATGAG CTGTACATCA CCACCAAGAT CTGGATTGAA AACCTTAGCA AAGACAAGCT 1140

AATCCCAAGC CTG

1153

>(38)C Montevideo\_CP017978

ATGTTTTGGC GGATTGAGAG ATGATTTTCA GCACTGATTC AGAGTTGAGT ACGCAATAAT 60

TTGCGCAGCA GCAAGGCGGC AAGCGAAGGA AAGGAAGGAG CATA CAGAAG TATGTGACTG 120

ACTTTACGAG CGCAGGCAAC GCCGCTGATG CGATAAAGAA TTGCGTACTG AGCATAAAAG 180

AATTTGCCTG GCGGCAGTAG CGCGGTGGTC CCACCTGACC CCATGCCGAA CTCAGAAGTG 240

AAACGCCGTA GCGCCGATGG TAGTGTGGGG TCTCCCCATG CGAGAGTAGG GAACTGCCAG 300

GCATCAAATT AAGCAGTAAG CCGGTCATAA ACCGGTGGTT GTAAAAGAAT TCGGTGGAGC 360

GG

362

>(39)C Montevideo\_CP020912

ATGTTTTGGC GGATGAGAGA CGATTTTCAG CACTGATTCA GAGTTGAGTA CGCAATAATT 60

TGCGCAGCAG CAAGGCGGCA AGCGAAGGAA AGGAAGGAGC ATACAGAAGT ATGTGACTGA 120

GTTTACGAGC GCGGGCAACG CCGCTGATGC GATAAAGAAT TGCCTACTGA GCATAAAAGA 180

ATTTGCCTGG CGGCACTAGC GCGGTGGTCC CACCTGACCC CATGCCGAAC TCAGAAGTGA 240

AACGCCGTAG CGCCGATGGT AGTGTGGGGT CTCCCCATGC GAGAGTAGGG AACTGCCAGG 300

CATCAAATTA AGCAGTAAGC CGGTCATAGA CTGGTGGTTG TAAAAAATT CGGTGGAGCG 360

G

361

>(40)C Montevideo\_CP032816

ATGTTTTGGC GGAAGGAGAG ACGATTTTCA GCACTGATTC AGAGTTGAGT ACGCAATAAT 60

TTGCGCAGCA GCAAGGCGGC AAGCGAAGGA AAGGAAGGAG CATAACAGAAG TATGTGACTG 120

ACTTTACGAG CGCAGGCAAC GCCGCTGATG CGATAAAGAA TTGCGTACTG AGCATAAAAG 180

AATTTGCCTG GCGGCAGTAG CGCGGTGGTC CCACCTGACC CCATGCCGAA CTCAGAAGTG 240

AAACGCCGTA GCGCCGATGG TAGTGTGGGG TCTCCCATG CGAGAGTAGG GAACTGCCAG 300

GCATCAAATT AAGCAGTAAG CCGGTCATAA ACCGGTGGTT GTAAAAGAAT TCGGTGGAGC 360

GG 362

>(41)C Newport\_CP015923

ATGTTTTGGC GGATGAGAGA AGATTTTCAG CACTGATTCA GAGTTGAGTA CGCAATAATT 60

TGCGCAGCAG CAAGGCGGCA AGCGAAGGAA AGGAAGGAGC ATACAGAAGT ATGTGACTGA 120

CTTTACGAGC GCAGGCAACG CCGCTGATGC GATAAAGAAT TCGGTACAGA GCACAAAGAA 180

TTTGCCTGGC GGCCTAGCG CGGTGGTCCC ACCTGACCCC ATGCCGA ACT CAGAAGTGAA 240

ACGCCGTAGC GCCGATGGTA GTGTGGGGTC TCCCATGCG AGAGTAGGGA ACTGCCAGGC 300

ATCAAATTAG AAGTATGGCA TTAAC TTTCG GGGCAGTTCA C TACTCGACA GAGAGTAGGA 360

CAAAAGCGAA AGCTTTTGAA CGTTGCGAAG CAACGGCCCG AAGGGTGAAT CACGAAGTGA 420

TTCATAAACT GCCAGGCATC AAATTGCAGT AAACCGGGAT GAAAATCCGG GTTGTGACAA 480

AGAAATTCGG TGGAGCGG 498

>(42)C Abony\_CP007534



ATGTTTTGGC GGATGAGAGA CGATTTTCAG CACTGATTCC GGATTTTCGG GAACGAAAGA 60

TTTTACGCTG AGGCAAGGCG GCAAATGAAG GAAAGGAAGG AGCATACAGA AGTATGTGAC 120

TGACTTTGCG AATGCAGCCA ACGCAGCATC GGTGTA AAAAG ATTCGTTTCC GGTAACAGAA 180

TTTGCCTGGC GGC ACTAGCG CGGTGGTCCC ACCTGACCCC ATGCCGAACT CAGAAGTGAA 240

ACGCCGTAGC GCCGATGGTA GTGTGGGGTC TCCCCATGCG AGAGTAGGGA ACTGCCAGGC 300

ATCAAATTAG AAGTATGGCA TTAAC TTTTCG GGGCAGTTCA C TACTCGACA GAGAGTAGGA 360

CAA AAGCGAA AGCTTTTGAA CGTTGCGAAG CAACGGCCCG AAGGGTGAAT CACGAAGTGA 420

TTCATAAACT GCCAGGCATC AAATTGCAGT AAACCGGGAT GAAAATCCGG GTTGTGACAA 480

AGAAATTCGG TGGAGCGG

498

>(43)X Corvallis\_CP051307

TGCGGAAGAG ATAAGTGCTG AAAGCATCTA AGCACGAAAC TTGCCCCGAG ATGAGTTCTC 60

CCTGAGACTT AGAGTCTCCT GAAGGAACGT TGAAGACGAC GACGTTGATA GGCCGGGTGT 120

GTAAGCGCAG CGATGCGTTG AGCTAACCGG TACTAATGAA CCGTGAGGCT TAACCTTACA 180

ACGCCGAAGA TGTTTTGGCG GAAGAGAGAC GATTTTCAGC ACTGATTCAG ATTACATCAG 240

AACGTAAAAA CGGTCTGATA ACAGAATTTG CCTGGCGGCA CTAGCGCGGT GGTCCCACCT 300

GACCCCATGC CGAACTCAGA AGTGAAACGC CGTAGCGCCG ATGGTAGTGT GGGGTCTCCC 360

CATGCGAGAG TAGGGAACTG CCAGGCATCA AATTAAGCAG TAAACTGATG TAAAAATCAG 420

TGGTTGTAAG AGAATTCGGT GGAGCGGTAG TTCAGTTGGT TAGAATACCT GCCTGTCACG 480

CAGGGGGTTCG CGGGTTCGAG TCCCGTCCGT TCCGCCACTT ATTAAGAGCC CTGAGCATT 540

GCTCAGGGCT TTTTCTTTGC CTGCGATTA ATTATTGCTC AATTCGCAA AATCCTCTGC 600

ATTTCTCGCT CTTTTTCTAC AAAGCGCTGA AGGTCATAAT CCCCTCAGTT AACGAACATA 660

GTGATTAATA AGAGGAATTC TATGACTATC CCTGCATTCG GTTTAGGTAC TTTTCGCCTG 720

AAAGACGACG TGGTTATCGC TTCTGTTAAA ACGGCGCTTG AACTAGGCTA CCGTGCTGTC 780

GACACTGCGC AAATCTATGA TAATGAAGCG GCTGTTGGAC AGGCGATTGC TGAGAGCGGC 840

GTACCGCGTA ATGAGCTGTA CATCACCACC AAGATCTGGA TTGAAAACCT TAGCAAAGAC 900

AAGCTAATCC CAAGCCTGAA AGAGAGCCTG AAAAACTGC GTACCGATTA TGTCGATCTG 960

ACGCTGATCC ACTGGCCATC TCCGGGTGAT GCCGTGTCTG TCGAAGAATT TATGCAGGCA 1020

TTGCTGGAAG CTAATAAACA AGGGCTGACT CGCGAAATTG GCATCTCAA CTCACTATT 1080

CCGTTGATGG AAAAGGCTAT TGCCGCGGTG GGCGCAGACA TATCGCCACC AACCAGATTG 1140

AGCTATCTCC GATCTGCAGA ATCGTAAGGG GGTGACTGGG AAAAAGGCGC 1190

>(44)C Senftenberg\_CP016837

ATGTTTTGGC GGATGAGAGA CGATTTTCAG CACTGATTCC GGATTTTCGG GAACGAAAGA 60

TTTTACGCTG AGGCAAGGCG GCAAATGAAG GAAAGGAAGG AGCATACAGA AGTATGTGAC 120

TGACTTTACG AATGCAGCCA ACGCAGCATC GGTGTAAGG ATTCGTTTCC GGCAACAGAA 180

TTTGCTGGC GGCCTAGCG CGGTGGTCCC ACCTGACCCC ATGCCGAAGT CAGAAGTGAA 240

ACGCCGTAGC GCCGATGGTA GTGTGGGGTC TCCCATGCG AGAGTAGGGA ACTGCCAGGC 300

ATCAAATTAG AAGTATGGCA TTAACITTCG GGGCAGTTCA CACTCGACA GAGAGTAGGA 360

CAAAGCGAA AGCTTTTGAA CGTTGCGAAG CAACGGCCCG AAGGGTGAAT CACGAAGTGA 420

TTCATAAACT GCCAGGCATC AAATTGCAGT AAACCGGGAT GAAAATCCGG GTTGTGACAA 480

AGAAATTCGG TGGAGCGG 498

>(45)C Isangi\_noNCBI match

ATGTTTTGGC GGAAGAGAGA CGATTTTCAG CACTGATTCA GATTACATCA GAACGTAAAA 60

ACGGTCTGAT AACAGAATTT GCCTGGCGGC AGTAGCGCGG TGGTCCCACC TGACCCCATG 120

CCGAAGTCAG AAGTGAAACG CCGTAGCGCC GATGGTAGTG TGGGGTCTCC CCATGCGAGA 180

GTAGGGA ACT GCCAGGCATC AAATTAAGCA GTAAACTGAT GTAAAAATCA GTGGTTGTAA 240

AAGAATTCGG TGGAGCGG

258

>(46)C Ohio\_CP030024

ATGTTTTGGC GGATTGAGAG GACAACAATT TTCAGCTCAG ATTCAGAGTC CGAAGGATTT 60

TACGCTGAGA CAAGGCGGCA AACGCAGCGA CGGAAGGAGC ATACAGAAGT ATGTGACTGA 120

CGCCCGCAAG AGCAGCCAAC GCCGTATCAG TGTAAGAC ACAGGACAGA GCACAAAGAA 180

TTTGCTGGC GGCCTAGCG CGGTGGTCCC ACCTGACCCC ATGCCGA ACT CAGAAGTGAA 240

ACGCCGTAGC GCCGATGGTA GTGTGGGGTC TCCCATGCG AGAGTAGGGA ACTGCCAGGC 300

ATCAAATTAA GCAGTAACT GATGTAAAA TCAGTGTTG TAAAAGAATT CGGTGGAGCG 360

G

361

>(47)C Infantis\_noNCBI match

ATGTTTTGGC GGATTGAGAG ATGATTTTCA GCACTGATTC AGAGTTGAGT ACGCAATAAT 60

TTGCGCAGCA GCAAGGCGC AAGCGAAGGA AAGGAAGGAG CATA CAGAAG TATGTGACTG 120

ACTTTACGAG CGCAGGCAAC GCCGCTGATG CGATAAAGAA TTGCGTACTG AGCATAAAG 180

AATTTGCCTG GCGGCAGTAG CGCGGTGGTC CCACCTGACC CCATGCCGAA CTCAGAAGTG 240

AAACGCCGTA GCGCCGATGG TAGTGTGGGG TCTCCCATG CGAGAGTAGG GAACTGCCAG 300

GCATCAAATT AGAAGTATGG CATTAACTTT CGGGGCAGTT CACTACTCGA CAGAGAGTAG 360

GACAAAAGCG AAAGCTTTTG AACGTTGCGA AGCAACGGCC CGAAGGGGGA ATCACGAAGT 420

GATTCATAAG CTGCCAGGCA TCAAATTGCA GTAAACCGGG ATGAAAATCC GGATTGTGAC 480

AAAGAAATTC GGTGGAGCGG 500

>(48)C Cerro\_noNCBI match

ATGTTTTGGC GGATGAGAAG ACAACAATTT TCAGCACTGA TTCCGGATTT TCGGGAACGA 60

AAGATTTTAC GCTGAGGCAA GCGGCAAAT GAAGGAAAGG AAGGAGCATA CAGAAGTATG 120

TGACTGACTT TACGAATGCA GCCAACGCAG CATCGGTGTA AAAGATTCGT TTCTGGCAAC 180

AGAATTTGCC TGGCGGCACT AGCGCGGTGG TCCCACCTGA CCCCATGCCG AACTCAGAAG 240

TGAAACGCCG TAGCGCCGAT GGTAGTGTGG GGTCTCCCA TGCGAGAGTA GGGAAGTACC 300

AGGCATCAAA TTAGAAGTAT GGCATTAAT TTCGGGGCAG TTCACTACTC GACAGAGAGT 360

AGGACAAAAG CGAAAGCTTT TGAACGTTGC GAAGCAACGG CCCGAAGGGC GAATCACGAA 420

GTGATTCATA AACTGCCAGG CATCAAATTA AGCAGTAAAC TGATGTAAAA ATCAGTGGTT 480

GTAAAAGAAT TCGGTGGAGC GG

502

>(49)C Blockley\_CP043662

ATGTTTTGGC GGATGAGAGA CGATTTTCAG CACTGATTCA GAGTTGAGTA CGCAATAATT 60

TGCGCAGCAG CAAGGCGGCA AGCGAAGGAA AGGAAGGAGC ATACAGAAGT ATGTGACTGA 120

GTTTACGAGC GCAGGCAACG CCGCTGATGC GATAAAGAAT TCGGTACAGA GCACAAAAGA 180

ATTTGCCTGG CGGCACTAGC GCGGTGGTCC CACCTGACCC CATGCCGAAC TCAGAAGTGA 240

AACGCCGTAG CGCCGATGGT AGTGTGGGGT CTCCCCATGC GAGAGTAGGG AACTGCCAGG 300

CATCAAATTA GAAGTATGGC ATTAAC TTTC GGGGCAGTTC ACTACTCGAC AGAGAGTAGG 360

ACAAAAGCGA AAGCTTTTGA AC GTT GCGAA GCAACGGCCC GAAGGGTGAA TCACGAAGTG 420

ATTCATAAAC TGCCAGGCAT CAAATTAAGC AGTAAACTGA TGTA AAAATC AGTGATTGTA 480

AAAGAATTCG GTGGAGCGG

499

>(50)X Johannesburg\_CP074325

CTTGCCCCGA GATGAGTTCT CCCTGAGACT TAGAGTCTCC TGAAGGAACG TTGAAGACGA 60

CGACGTTGAT AGGCCGGGTG TGTAAGCGCA GCGATGCGTT GAGCTAACCG GTACTAATGA 120

ACCGTGAGGC TTAACCTTAC AACGCCGAAG ATGTTTTGGC GGATGAGAGA CGATTTTCAG 180

CACTGATTCA GAGTTGAGTA CGCAATAATT TGCGCAGCAG CAAGGCCGCA AGCGAAGGAA 240

AGGAAGGAGC ATACAGAAGT ATGTGACTGA GTTTACGAGC GCAGGCAACG CCGCTGATGC 300

GATAAAGAAT TCGTACTGA GCATAAAAGA ATTTGCCTGG CGGCACTAGC GCGGTGGTCC 360

CACCTGACCC CATGCCGAAC TCAGAAGTGA AACGCCGTAG CGCCGATGGT AGTGTGGGGT 420

CTCCCATGC GAGAGTAGGG AACTGCCAGG CATCAAATTG CAGTAAACCG GGATGAAAAT 480

CCGGGTTGTG ACAAAGAAAT TCGGTGGAGC GGTAGTTCAG TTGGTTAGAA TACCTGCCTG 540

TCACGCAGGG GGTCGCGGGT TCGAGTCCCG TCCGTTCCGC CACTTATTAA GAGCCCTGAG 600

CATTAGTTCA GGGCTTTTTT TTTGCCTGTC ATTTAATTAT TGCTCAATTC GCAAAAATCC 660

TCTGCATTC TCGCTCTTTT TCTACAAAGC GCTGAAGGTC ATAATCCCCT CAGTTAACGA 720

ACATAGTGAT TAAAAAGAGG AATTCTATGA CTATCCCTGC ATTCGGTTTA GGTACTTTTC 780

GCCTGAAAGA CGACGTGGTT ATCGCTTCTG TGAAAACGGC GCTTGAAGTGGCTACCGTG 840

CTGTGACAC TGCGCAAATC TATGATAATG AAGTTGCTGT TGGACAGGCG ATTGCTGAGA 900

GCGGCGTACC GCGTAATGAG CTGTACATCA CCACTAAGAT CTGGATTGAA AACCTTAGCA 960

AAGACAAGCT GATCCAAGC CTGAAAGAGA GCCTGAAAAA ACTGCGTACC GATTATGTCG 1020

ATCTGACGCT GATCCAAGCTGG CCATCTCCGG GTGATGCCGT GTCTGTCGAA GAATTTATGC 1080

AGGCATTGCT TGAAGCTAAA AACAAGGGCT GACTCGCGAA TTGGCATTTC AACTTCACAT 1140

TCCGTTGATG GAAAAGCTAT TGCCGCGGGG GCGTAGACAT ATCGCACCCAC CAGATGAGCT 1200

TC 1202

>(51)C Genovar\_12350N\_noNCBI match

ATGTTTTGGC GGTTGAGAGA CGATTTTCAG CACTGATTCC GGATTTTCGG GAACGAAAGA 60

TAAAAGATTC GTTCCGGCA ACAGAATTG CCTGGCGGCA CTAGCGCGGT GGTCCACCT 120

GACCCCATGC CGAACTCAGA AGTGAAACGC CGTAGCGCCG ATGGTAGTGT GGGGTCTCCC 180

CATGCGAGAG TAGGGAAGT CCAGGCATCA AATTAGAAGT ATGGCATTAA CTTTCGGGGC 240

AGTTCACTAC TCGACAGAGA GTAGGACAAA AGCGAAAGCT TTTGAACGTT GCGAAGCAAC 300

GGCCCGAAGG GTGAATCACG AAGTGATTCA TAAACTGCCA GGCATCAAAT TAAGCAGTAA 360

GCCGGTCATA AACTGGTGGT TGTAACAAAAA TTCGGTGGAG CGG 403

>(52)C Miami\_noNCBI match

ATGTTTTGGC GGATGAGAGA CGATTTTCAG CACTGATTCA GAGTTGAGTA CGCAATAATT 60



TGCGCAGCAG CAAGGCGGCA AGCGAAGGAA AGGAAGGAGC ATACAGAAGT ATGTGACTGA 120

CTTTGCGAGC GCAGGCAACG CCGCTGATGT GATAAAGAAT TGCGTACTGA GCACAAAGAA 180

TTTGCCTGGC GGCCTAGCG CGGTGGTCCC ACCTGACCCC ATGCCGAAC T CAGAAGTGAA 240

ACGCCGTAGC GCCGATGGTA GTGTGGGGTC TCCCCATGCG AGAGTAGGGA ACTGCCAGGC 300

ATCAAATTAG AAGTATGGCA TTAAC TTTTCG GGGCAGTTCA C TACTCGACA GAGAGTAGGA 360

CAAAAGCGAA AGCTTTTGAA CGTTGCGAAG CAACGGCCCC AAGGGTGAAT CACGAAGTGA 420

TTCATAAACT GCCAGGCATC AAATTAAGCA GTAAGCCGGT CATAAACTGG TGGTTGTAAA 480

AAAATTCGGT GGAGCGG

497

>(53)C Saintpaul\_noNCBI match

ATGTTTTGGC GGTTAAGAGA AGATTTTCAG CACTGATTCA GAGTTGAGTA CGCAATAATT 60

TGCGCAGCAG CGAGGCGGCA AGCGAAGGAA AGGAAGGAGC ATACAGAAGT ATGTGACTGA 120

CTTTACGAGC GCAGGCAACG CCGCTGATGC GATAAAGAAT TGCGTACAGA GCACAAAGAA 180

TTTGCCTGGC GGCCTAGCG CGGTGGTCCC ACCTGACCCC ATGCCGAAC T CAGAAGTGAA 240

ACGCCGTAGC GCCGATGGTA GTGTGGGGTC TCCCCATGCG AGAGTAGGGA ACTGCCAGGC 300

ATCAAATTAG AAGTATGGCA TTAAC TTTTCG GGGCAGTTCA C TACTCGACA GAGAGTAGGA 360

CAAAAGCGAA AGCTTTTGAA CGTTGCGAAG CAACGGCCCG AAGGGTGAAT CACGAAGTGA 420

TTCATAAACT GCCAGGCATC AGATTAAGCA GTAAACTGAT GTAAAAATCA GTGGTTGTAA 480

AAGAATTCGG TGGAGCGG 498

>(54)C Albany\_CP036165

ATGTTTTGGC GGATTGAGAA GACAACAATT TTCAGCTCAG ATTCAGAGTC CGAAGGATTT 60

TACGCTGAGA CAAGGCGGCA AACGCAGCGA CGGAAGGAGC ATACAGAAGT ATGTGACTGA 120

CGCCCGCAAG AGCAGCCAAC GCCGTATCAG TGTAAGAGAC ACAGGACAGA GCACAAAGAA 180

TTTGCCTGGC GGCCTAGCG CGGTGGTCCC ACCTGACCCC ATGCCGAAGT CAGAAGTGAA 240

ACGCCGTAGC GCCGATGGTA GTGTGGGGTC TCCCATGCG AGAGTAGGGA ACTGCCAGGC 300

ATCAAATTAG AAGTATGGCA TTAACCTTCG GGGCAGTTCA CTAAGCGACA GAGAGTAGGA 360

CAAAAGCGAA AGCTTTTGAA CGTTGCGAAG CAACGGCCCG AAGGGTGAAT CACGAAGTGA 420

TTCATAAACT GCCAGGCATC AAATTGCAGT AAACCGGGAT GAAAATCCGG ATTGTGACAA 480

AGAAATTCGG TGGAGCGG 498

>(55)C Braenderup\_CP022490

CTGTTTTGGC GGATTGAGAA GACAACAATT TTCAGCTCAG ATTCAGAGTC CGAAGGATTT 60

TACGCTGAGA CAAGGCGGCA AACGCAGCGA CGGAAGGAGC ATACAGAAGT ATGTGACTGA 120

CGCTCGCAAG AGCAGCCAAC GCGGTATCAG TGTAAGAC ACAGGACAGA GCACAAAGAA 180

TTGCTGGC GGCCTAGCG CGGTGGTCCC ACCTGACCCC ATGCCGAAC CAGAAGTGAA 240

ACGCCGTAGC GCCGATGGTA GTGTGGGGTC TCCCCATGCG AGAGTAGGGA ACTGCCAGGC 300

ATCAAATTAG AAGTATGGCA TTAACCTTCG GGGCAGTTCA CTAATCGACA GAGAGTAGGA 360

CAAAGCGAA AGCTTTTGAA CGTTGCGAAG CAACGGCCCG AAGGATGAAT CACGAAGTGA 420

TTCATAAACT GCCAGGCATC AAATTAAGCA GTAAACTGAT GTAAAAATCA GTGGTTGTAA 480

AAGAATTCGG TGGAGCGG

498

>(56)C Rissen\_noNCBI match

ATGTTTTGGC GGTTGAGAGA TGATTTTCAG CACTGATTCA GAGTTGAGTA CGCAATAATT 60

TGCGCAGCGG CAAGGCGGCA AGCGAAGGAA AGGAAGGAGC ATACAGAAGT ATGTGACTGA 120

CTTACGAGC GCAGGTAACG CCGCTGATGC GATAAAGAAT TGCGCACTGA GCACAAAGAA 180

TTGCTGGC GGCCGTAGCG CGGTGGTCCC ACCTGACCCC ATGCCGAAC CAGAAGTGAA 240

ACGCCGTAGC GCCGATGGTA GTGTGGGGTC TCCCCATGCG AGAGTAGGGA ACTGCCAGGC 300

ATCAAATTAG AAGTATGGCA TTAACCTTCG GGGCAGTTCA CTACTIONGACA GAGAGTAGGA 360

CAAAAGCGAA AGCTTTTGAA CGTTGCGAAG CAACGGCCCC AAGGGTGAAT CACGAAGTGA 420

TTCATAAACT GCCAGGCATC AAATTAAGCA GTAAACTGAT GTAAAAATCA GTGGTTGTAA 480

AAGAATTCGG TGGAGCGG 498

>(57)C Kedougou\_noNCBI match

ATGTTTTGGC GGATGAGAGA CGATTTTCAG CACTGATTCA GAGTTGAGTA CGCAATAATT 60

TGCGCAGCAG CAAGGCGGCA AGCGAAGGAA AGGAAGGAGC ATACAGAAGT ATGTGACTGA 120

CTTTACGAGC GCGGGCAACG CCGCTGATGC GATAAAGAAT TCGTACTGA GCACAAAAGA 180

ATTTGCCTGG CGGCCGTAGC GCGGTGGTCC CACCTGACCC CATGCCGAAC TCAGAAGTGA 240

AACGCCGTAG CGCCGATGGT AGTGTGGGGT CTCCCATGC GAGAGTAGGG AACTGCCAGG 300

CATCAAATTA GAAGTATGGC ATTAACCTTC GGGGCAGTTC ACTACTCGAC AGAGAGTAGG 360

ACAAAAGCGA AAGCTTTTGA ACGTTGCGAA GCAACGGCCC GAAGGGTGAA TCACGAAGTG 420

ATTCATAAAC TGCCAGGCAT CAAATTAAGC AGTAAACTGA GTAAAAATC AGTGGTTGTA 480

AAAGAATTCG GTGGAGCGG 499

>(58)C Enteritidis\_CP007598

ATGTTTTGGC GGATGAGAAG ACGATTTTCA GCAGTGATTC AGAGTTGAGT ACGCAATAAT 60

TTGCGCAGCA GCAAGGCGGC AAGCGAAGGA AAGGAAGGAG CATAACAGAAG TATGTGACTG 120

AGTTTACGAG CGCAGGCAAC GCCGCTGATG CGATAAAGAA TTGCGTACAG AGCACAAAGA 180

ATTTGCCTGG CGGCAGTAGC GCGGTGGTCC CACCTGACCC CATGCCGAAC TCAGAAGTGA 240

AACGCCGTAG CGCCGATGGT AGTGTGGGGT CTCCCATGC GAGAGTAGGG AACTGCCAGG 300

CATCAAATTA GAAGTATGGC ATTAAC TTTC GGGGCAGTTC ACTACTCGAC AGAGAGTAGG 360

ACAAAAGCGA AAGCTTTTGA ACGTTGCGAA GCAACGGCCC GAAGGGTGAA TCACGAAGTG 420

ATTCATAAAC TGCCAGGCAT CAAATTGCAG TAAACCGGGA TGAAAATCCG GGTTGTGACA 480

AAGAAATTCG GTGGAGCGG

499

>(59)C Paratyphi-B\_CP020492

ATGTTTTGGC GGATTGAGAA GACGAACAAT TTTCAGCTCA GATTCAGAGT CCGAAGGATT 60

TTACGCTGAG ACAAGGCGGC AAACGCAGCG ACGGAAGGAG CATAACAGAAG TATGTGACTG 120

ACGCTCGCAA GAGCAGCCAA CGCCGTATCA GTGTAAAAGA CACAGGACAG AGCACAAAGA 180

ATTTGCCTGG CGGCACTAGC GCGGTGGTCC CACCTGACCC CATGCCGAAC TCAGAAGTGA 240

AACGCCGTAG CGCCGATGGT AGTGTGGGGT CTCCCATGC GAGAGTAGGG AACTGCCAGG 300

CATCAAATAG AATGAAAGGC CCTGTCCGAA GACTGGGCCT TTTGTTTTAT CTGTAGTCTG 360

CCGGTGAGCA CTCTCCTGAG GAGGAGAAAT CCGCCGGGAG CGGATTTGAA CGTTGCGCAG 420

CAACGGCCCG GAGGGTGGCG GGCAGGACGC CCGCCATAAA CTGCCAGGCA TCAAATTAAG 480

CAGTAAGCCG GTCATAGATC GGTGGTTGTA AAAGAATTCG GTGGAGCGG 529

>(60)X Muenster\_Typhimurium\_CP019198\_CP074302

TGCGGAAGAG ATAAGTGCTG AAAGCATCTA AGCACGAAAC TTGCCCGAG ATGAGTTCTC 60

CCTGAGACTT AGAGTCTCCT GAAGGAACGT TGAAGACGAC GACGTTGATA GGCCGGGTGT 120

GTAAGCGCAG CGATGCGTTG AGCTAACCGG TACTAATGAA CCGTGAGGCT TAACCTTACA 180

ACGCCGAAGA TGTTTTGGCG GTTGAGAAGA CAACAATTTT CAGCTCAGAT TCAGATTACA 240

TCAGAACGTA AAAACGGTCT GATAACAGAA TTTGCCTGGC GGCCTAGCG CGGTGGTCCC 300

ACCTGACCCC ATGCCGAAC TACAAGTGAA ACGCCGTAGC GCCGATGGTA GTGTGGGGTC 360

TCCCATGCG AGAGTAGGGA ACTGCCAGGC ATCAATTTAA GCAGTAAACT GATGTAAAAA 420

TCAGTGGTTG TAAAAGAATT CCGTGGAGCG GTAGTTCAGT TGGTTAGAAT ACCTGCCTGT 480

CACGCAGGGG GTCGCGGGTT CGAGTCCCGT CCGTCCGCC ACTTATTAAG AGCCCTGAGC 540

ATTAGCTCAG GGCTTTTTCT TTGCCTGTCA TTTAATTATT GCTCAATTCG CAAAAATCCT 600

CTGCATTCT CGCTTTTTT CTACAAAGCG CTGAAGGTCA TAATCCCCTC AGTTAACGAA 660

CATAGTGATT AAAAAGAGGA GTTCTATGAC TATCCCTGCA TTCGGTTTAG GTACTTTTCG 720

CCTGAAAGAC GACGTGGTTA TCGCTTCTGT GAAAACGGCG CTTGAACTGG GCTACCGTGC 780

TGTCGACACT GCGCAAATCT ATGATAATGA AGTTGCTGTT GGACAGGCGA TTGCTGAGAG 840

CGGCGTACCG CGTAATGAGC TGTACATCAC CACTAAGATC TGGATTGAAA ACCTTAGCAA 900

AGACAAGCTG ATCCCAAGCC TGAAAGAGAG CCTGAAAAA CTGCGTACCG ATTATGTCGA 960

TCTGACGCTG ATCCACTGGC CATCTCCGGG TGATGCCGTG TCTGTCGAAG AATTTATGCA 1020

GGCATTGCTT GAAGCTAAAA AACAAGGGCT GACTCGCGAA ATTGGCATT CAACTTCAC 1080

CATTCCGTTG ATGGAAAAGG CTATTGCCGC GGTGGGCGTA GACAATATCG CCACCAACCA 1140

GATTGAGCTA TCTCCGTATC TGCAGAATCG 1170

>(61)X Muenchen\_CP022658

GGAAGAGATA AGTGCTGAAA GCATCTAAGC ACGAACTTG CCCCAGATG AGTTCTCCCT 60

GAGACTTTAG GTCTCCTGAA GGAACGTTGA AGACGACGAC GTTGATAGGC CGGGTGTGTA 120

AGCGCAGCGA TGC GTT GAGC TAACCGGTAC TAATGAACCG TGAGGCTTAA CCTTACAACG 180

CCGAAGATGT TTTGGCGGTT GAGAGACGAT TTTCAGCACT GATTCAGATT ACATCAGAAC 240

GTAAAAACGG TCTGATAACA GAATTTGCCT GGCGGCACTA GCGCGGTGGT CCCACCTGAC 300

CCCATGCCGA ACTCAGAAGT GAAACGCCGT AGCGCCGATG GTAGTGTGGG GTCTCCCCAT 360

GCGAGAGTAG GAACTGCCA GGCATCAAAT TAGAAGTATG GCATTA ACTT TCGGGGCAGT 420

TCACTACTCG ACAGAGAGTA GGACAAAAGC GAAAGCTTTT GAACGTTGCG AAGCAACGGC 480

CCGAAGGGTG AATCACGAAG TGATTCATAA ACTGCCAGGC ATCAAATTGC AGTAAACCGG 540

GATGAAAATC CGGGTTGTGA CAAAGAAATT CGGTGGAGCG GTAGTTCAGT TGGTTAGAAT 600

ACCTGCCTGT CACGCAGGGG GGCGCGGGTT CGAGTCCCGT CCGTCCGCC ACTTATTAAG 660

AGCCCTGAGC ATTAGCTCAG GGCTTTTTCT TTGCCTGCGA TTTAATTATT GCTCAATTCG 720

CAAAAATCCT CTGCATTTCT CGCTCTTTTT CTACAAAGCG CTGAAGGTCA TAATCCCCTC 780

AGTTAACGAA CATAGTGATT AAAAAGAGGA ATTCTATGAC TATCCCTGCA TTCGGTTTAG 840

GTACTTTTCG CCTGAAAGAC GACGTGGTTA TCGCTTCTGT TAAAACGGCG CTTGAACTGG 900

GCTACCGTGC TGTCGACACT GCGCAAATCT ATGATAATGA AGCGGCTGTT GGACAGGCCA 960



TTGCTGAGAG CGGTGTACCG CGTAATGAGC TGTATATCAC CACCAAGATC TGGATTGAAA 1020

ACCTTAGCAA AGACAAGCTA ATCCCAAGCC TGAAAGAGAG CCTGAAAAAA CTGCGTACCG 1080

ATTATGTCGA TCTGACGCTG ATCCACTGGC CATCTCCGGG TGATGCCGTG TCTGTGGAAG 1140

AATTATGCAG GCTTGCTTGA AGCTAAAAAC AAGGGCTGAC TCGCGAAATG GCATTTCAAC 1200

TTCACATTCC TTGATGGAAA AGCTTTGCC 1229

>(62)C Enteritidis\_CP045956

ATGTTTTGGC GGATGAGAAG ACGATTTTCA GCACTGATTC AGATTACATC AGAACGTAAA 60

AACGGTCTGA TAACAGAATT TGCCTGGCGG CACTAGCGCG GTGGTCCCAC CTGACCCCAT 120

GCCGAACTCA GAAGTGAAAC GCCGTAGCGC CGATGGTAGT GTGGGGTCTC CCCATGCGAG 180

AGTAGGGAAC TGCCAGGCAT CAAATTAGAA GTATGGCATT AACTTTCGGG GCAGTTCCT 240

ACTCGACAGA GAGTAGGACA AAAGCGAAAG CTTTTGAACG TTGCGAAGCA ACGGCCCGAA 300

GGGTGAATCA CGAAGTGATT CATAAACTGC CAGGCATCAA ATTAAGCAGT AACTGATGT 360

AAAAATCAGT GGTTGTAAAA GAATTCGGTG GAGCGG 396

>(63)C Alachua\_noNCBI match

ATGTTTTGGC GGATTGAGAA GACAACAATT TTCAGCTCAG ATTCAGAGTC CGAAGGATTT 60

TACGCTGAGA CAAGGCGGCA AACGCAGCGA CGGAAGGAGC ATACAGAAGT ATGTGACTGA 120

CGCTCGCAAG AGCAGCCAAC GCCGTATCAG TGTAAGAGAC AAAGGACAGA GCACAAAGAA 180

TTTGCTGGC GGCCTAGCG CGGTGGTCCC ACCTGACCCC ATGCCGAAC CAGAAGTGAA 240

ACGCCGTAGC GCCGATGGTA GTGTGGGGTC TCCCCATGCG AGAGTAGGGA ACTGCCAGGC 300

ATCAAATTAA GCAGTAAGCC GGTCATAGAC TGGTGGTTGT AAAAGAATTC GGTGGAGCGG 360

>(64)C Litchfield\_CP082600

ATGTTTTGGC GGATTGAGAA GACAACAATT TTCAGCTCAG ATTCAGAGTC CGAAGGATTT 60

TACGCTGAGA CAAGGCGGCA AACGCAGCGA CGGAAGGAGC ATACAGAAGT ATGTGACTGA 120

CGCCCGCAAG AGCAGCCAAC GCCGTATCAG TGTAAGAGAC ACAGGACAGA GCACAAAGAA 180

TTTGCTGGC GGCCTAGCG CGGTGGTCCC ACCTGACCCC ATGCCGAAC CAGAAGTGAA 240

ACGCCGTAGC GCCGATGGTA GTGTGGGGTC TCCCCATGCG AGAGTAGGGA ACTGCCAGGC 300

ATCAAATTAG AAGTATGGCA TTAACCTTCG GGGCAGTTCA CTAATCGACA GAGAGTAGGA 360

CAAAAGCGAA AGCTTTTGAA CGTTGCGAAG CAACGGCCCCG AAGGGTGAAT CACGAAGTGA 420

TTCATAAACT GCCAGGCATC AAATTAAGCA GTAAACTGAT GTAAAAATCA GTGGTTGTAA 480

AAGAATTCGG TGGAGCGG

498

>(65)C Kiambu\_noNCBImatch

ATGTTTTGGC GGATGAGAAG ACGATTTTCA GCACTGATTC CGGATTTTCG GGAACGAAAG 60

ATTTTACGCT GAGGCAAGGC GGCAAATGAA GGAAAGGAAG GAGCATACAG AAGTATGTGA 120

CTGACTTTAC GAATGCAGCC AACGCAGCAT CGGTGTAAAA GATTCGTTTC TGGCAACAGA 180

ATTTGCCTGG CGGCACTAGC GCGGTGGTCC CACCTGACCC CATGCCGAAC TCAGAAGTGA 240

AACGCCGTAG CGCCGATGGT AGTGTGGGGT CTCCCATGC GAGAGTAGGG AACTGCTAGG 300

CATCAAATTA GAAGTATGGC ATTAAC TTTC GGGGCAGTTC ACTACTCGAC AGAGAGTAGG 360

ACAAAAGCGA AAGCTTTTGA ACGTTGCGAA GCAACGGCCC GAAGGGTGAA TCACGAAGTG 420

ATTCATAAAC TGCCAGGCAT CAAATTAAGC AGTAACTGA TGTA AAAATC AGTGGTTGTA 480

AAAGAATTCG GTGGAGCGG

499

>(66)X Anatum\_Hayindogo\_CP007584\_CP017719

GAAGAGATAA GTGCTGAAAG CATCTAAGCA CGAAACTTGC CCCGAGATGA GTTCTCCCTG 60

AGACTTAGAG TCTCCTGAAG GAACGTTGAA GACGACGACG TTGATAGGCC GGGTGTGTAA 120

GCGCAGCGAT GCGTTGAGCT AACCGTACT AATGAACCGT GAGGCTTAAC CTTACAACGC 180

CGAAGATGTT TTGGCGGATT GAGAAGACAA CAATTTTCAG CTCAGATTCA GAGTCCGAAG 240

GATTTTACGC TGAGACAAGG CGGCAAACGC AGCGACGGAA GGAGCATACA GAAGTATGTG 300

ACTGACGCTC GCAAGAGCAG CCAACGCCGT ATCAGTGTA AAGACACAGG ACAGAGCACA 360

AAGAATTTGC CTGGCGGCAC TAGCGCGGTG GTCCACCTG ACCCATGCC GAACTCAGAA 420

GTGAAACGCC GTAGCGCCGA TGGTAGTGTG GGGTCTCCCC ATGCGAGAGT AGGGAAGTGC 480

CAGGCATCAA ATTAGAAGTA TGGCATTAA TTTCCGGGCA GTTCACTACT CGACAGAGAG 540

TAGGACAAAA GCGAAAGCTT TTGAACGTTG CGAAGCAACG GCCCGAAGGG TGAATCACGA 600

AGTGATTCAT AAAGTCCAG GCATCAAATT AAGCAGTAAA CTGATGTAAA AATCAGTGGT 660

TGTAAAAGAA TTCGGTGGAG CGGTAGTTCA GTTGGTTAGA ATACCTGCCT GTCACGCAGG 720

GGGTCGCGGG TTCGAGTCCC GTCCGTTCCG CCACTTATTA AGAGCCCTGA GCATTAGCTC 780

AGGGCTTTTT CTTTGCATGT CATTTAATTA TTGCTCAATT CGCAAAAATC CTCTGCATT 840

CTCGCTCTTT TTCTGCAAAG CGCTGAAGGT CATAATCCCC TCAGTTAACG AACATAGTGA 900

TTAAAAGAG GAATTCTATG ACTATCCCTG CATTGTTTT AGGTACTTTT CGCCTGAAAG 960

ACGACGTGGT TATCGCTTCT GTGAAAACGG CGCTTGAAGT GGGCTACCGT GCTGTGACGA 1020

CTGCGCAAAT CTATGATAAT GAAGCGGCTG TTGGACAGGC GATTACTGAG AGCGGGCTAC 1080

CACGTAGCGA GCTGTACATC ACCACCAAGA TCTGGATTGA A 1121

>(67)C Meleagris\_noNCBImatch

CCGCTCCACC GAATTTCTTT GTCACAACCC GGATTTTCAT CCCGGTTTAC TGCAATTTGA 60

TGCCTGGCAG TTTATGAATC ACTTCGTGAT TCACCCTTCG GGCCGTTGCT TCGCAACGTT 120

CAAAAGCTTT CGCTTTTGTC CTA CTCTCTG TCGAGTAGTG AACTGCCCG AAAGTTAATG 180

CCATACTTCT AATTTGATGC CTGGCAGTTC CCTACTCTCG CATGGGGAGA CCCCACTA 240

CCATCGGCGC TACGGCGTTT CACTTCTGAG TTCGGCATGG GGTCAGGTGG GACCACCGCG 300

CTAGTGCCGC CAGGCAAATT CTTTGTGCTC TGTACGCAAT TCTTTATCGC ATCAGCGGCG 360

TTGCCTGCGC TCGTAAAGTC AGTCACATAC TTCTGTATGC TCCTTCCTTT CCTTCGCTTG 420

CCGCCTTGCT GCTGCGCAA TTATTGCGTA CTCAACTCTG AATCACTGCT GAAAATCGTC 480

TTCATCCGC CAAAACAT 498

>(68)C Molade\_noNCBImatch

ATGTTTTGGC GGATGAGAAG ACGATTTTCA GCTCAGATTC AGATTACATC AGAACGTAAA 60

AACGGTCTGA TAACAGAATT TGCCTGGCGG CCGTAGCGCG GTGGTCCCAC CTGACCCCAT 120

GCCGAACTCA GAAGTGAAAC GCCGTAGCGC CGATGGTAGT GTGGGGTCTC CCCATGCGAG 180

AGTAGGGAAC TGCCAGGCAT CAAATTGCAG TAAACCAGGA TGAAAATCCG GGTTGTGACA 240

AAGAAATTCG GTGGAGCGG 259

>(69)C Bareilly\_noNCBImatch

ATGTTTTGGC GGATGAGAGA CGATTTTCAG CACTGATTCA GAGTTGAGTA CGCAATAATT 60

TGCGCAGCAG CAAGGCGGCA AGCGAAGGAA AGGCAGGAGC ATACAGAAGT ATGTGACTGA 120

GTTTACGAGC GCAGGCAACG CCGCTGATGC GATAAAGAAT TCGGTACAGA GCACAAAAGA 180

ATTTGCCTGG CGGCACTAGC GCGGTGGTCC CACCTGACCC CATGCCGAAC TCAGAAGTGA 240

AACGCCGTAG CGCCGATGGT AGTGTGGGGT CTCCCATGC GAGAGTAGGG AACTGCCAGG 300

CATCAAATTA GAAGTATGGC ATTAAC TTTC GGGGCAGTTC ACTACTCGAC AGAGAGTAGG 360

ACAAAAGCGA AAGCTTTTGA ACGTTGCGAA GCAACGGCCC GAAGGGTGAA TCACGAAGTG 420

ATTCATAAAC TGCCAGGCAT CAATTTAAGC AGTAACTGA TGTA AAAATC AGTGATTGTA 480

AAAGAATTCG GTGGAGCGG 499

>(70)C Newport\_CP075033

ATGTTTTGGC GGATTGAGAA GACAACAATT TTCAGCTCAG ATTCAGAGTC CGAAGGATTT 60

TACGCTGAGA CAAGGCGGCA AACGCAGCGA CGGAAGGAGC ATACAGAAGT ATGTGACTGA 120

CGCCCGCAAG AGCAGCCAAC GCCGTATCAG TGTAAGAC ACAGGACAGA GCACAAAGAA 180

TTGCTGGC GGCCTAGCG CGGTGGTCCC ACCTGACCCC ATGCCGAAC CAGAAGTGAA 240

ACGCCGTAGC GCCGATGGTA GTGTGGGGTC TCCCATGCG AGAGTAGGGA ACTGCCAGGC 300

ATCAAATTAG AAGTATGGCA TTAACCTTCG GGGCAGTTCA CTAATCGACA GAGAGTAGGA 360

CAAAGCGAA AGCTTTTGAA CGTTGCGAAG CAACGGCCCG AAGGGTGAAT CACGAAGTGA 420

TTCATAAACT GCCAGGCATC AAATTGCAGT AAACCGGGAT GAAAATCCGG GTTGTGACAA 480

AGAAATTCGG TGGAGCGG

498

>(71)C Soerenga\_CP074317

ATGTTTTGGC GGATGAGAGA CGATTTTCAG CACTGATTCC GGATTTTCGG GAACGAAAGA 60

TTTTACGCTG AGGCAAGGCG GCAAATGAAG GAAAGGAAGG AGCATACAGA AGTATGTGAC 120

TGACTTTGCG AATGCAGCCA ACGCAGCATC GGTGTAAAAG ATTCGTTTCC GGCAACAGAA 180

TTGCTGGC GGCCTAGCG CGGTGGTCCC ACCTGACCCC ATGCCGAAC CAGAAGTGAA 240

ACGCCGTAGC GCCGATGGTA GTGTGGGGTC TCCCATGCG AGAGTAGGGA ACTGCCAGGC 300

ATCAAATTAG AAGTATGGCA TTAACITTCG GGGCAGTTCA CTAICTGACA GAGAGTAGGA 360

CAAAAGCGAA AGCTTTTGAA CGTTGCGAAG CAACGGCCCG AAGGGTGAAT CACGAAGTGA 420

TTCATAAACT GCCAGGCATC AAATTAAGCA GTAAACTGAT GTAAAAATCA GTGGTTGTAA 480

AAGAATTCGG TGGAGCGG 498

>(72)C Norwich\_noNCBImatch

ATGTTTTGGC GGTTGAGAGA TGATTTTCAG CACTGATTCC GGATTTTCGG GAACGAAAGA 60

TAAAAGATTC GTTCCGGCA ACAGAATTTG CCTGGCGGCA CTAGCGCGGT GGTCCACCT 120

GACCCCATGC CGAACTCAGA AGTGAAACGC CGTAGCGCCG ATGGTAGTGT GGGGTCTCCC 180

CATGCGAGAG TAGGGAATG CCAGGCATCA AATTAAGCAG TAAACTGATG TAAAAATCAG 240

TGGTTGTAAA AGAATTCGGT GGAGCGG 267

>(73)C Gera\_Genovar\_3109\_noNCBImatch

ATGTTTTGGC GGATGAGAGA TAATTTTCAG CACTGATTCA GATTACATCA GAACGTAAAA 60

ACGGTCTGAT AACAGAATTT GCCTGGCGGC ACTAGCGCGG TGGTCCCACC TGACCCCATG 120

CCGAACTCAG AAGTGAAACG CCGTAGCGCC GATGGTAGTG TGGGGTCTCC CCATGCGAGA 180



GTAGGGA ACT GCCAGGCATC AAATTAGAAG TATGGCATTACTTTTCGGGG CAGTTCACTA 240

CTCGACAGAG AGTAGGACAA AAGCGAAAGC TTTTGAACGT TGCGAAGCAA CGGCCCGAAG 300

GGTGAATCAC GAAGTGATTC ATAACTGCC AGGCATCAAA TTAAGCAGTA AACTGATGTA 360

AAAATCAGTG GTTGTAAG AATTCGGTGG AGCGG 395

>(74)C Hartford\_CP074274

ATGTTTTGGC GGTTGAGAAG ACGAACAATT TTCAGCTCAG ATTCAGAGTC CGAAGGATTT 60

TACGCTGAGA CAAGGCGGCA AACGCAGCGA CGGAAGGAGC ATACAGAAGT ATGTGACTGA 120

CGCTCGCAAG AGCAGCCAAC GCCGTATCAG TGTAAGAC ACAGGACAGA GCACAAAGAA 180

TTTGCTGGC GGCCTAGCG CGGTGGTCCC ACCTGACCCC ATGCCGA ACT CAGAAGTGAA 240

ACGCCGTAGC GCCGATGGTA GTGTGGGGTC TCCCATGCG AGAGTAGGGA ACTGCCAGGC 300

ATCAAATTA GCAAGTAACT GATGTAAAA TCAGTGGTTG TAAAAGAATT CGGTGGAGCG 360

G 361

>(75)C Cerro\_NoNCBI match

ATGTTTTGGC GGATGAGAGA AGATTTTCAG CACTGATTCA GAGTTGAGTA CGCAATAATT 60

TGCGCAGCAG CAAGGCGGCA AGCGAAGGAA AGGAAGGAGC ATACAGAAGT ATGTGACTGA 120

CTTTACGAGC GCAGGCAACG CCGCTGATGC GATAAAGAAT TCGTACTGA GCACAAAAGA 180

ATTTGCCTGG CGGCAGTAGC GCGGTGGTCC CACCTGACCC CATGCCGAAC TCAGAAGTGA 240

AACGCCGTAG CGCCGATGGT AGTGTGGGGT CTCCCCATGC GAGAGTAGGG AACTGCCAGG 300

CATCAAATTA AGCAGTAAGC CGGTCATAGA CTGGTGGTTG TAAAAGAATT CGGTGGAGCG 360

G 361

>(76)C Cerro\_NoNCBImatch

ATGTTTTGGC GGATGAGAAG ACGATTTTCA GCACTGATTC CGGATTTTCG GGAACGAAAG 60

ATTTTACGCT GAGGCAAGGC TGCAAATGAA GGAAAGGAAG GAGCATAACAG AAGTATGTGA 120

CTGACTTTAC GAATGCAGCC AACGCAGCAT CGGTGTAAAA GATTCGTTTC TGGCAACAGA 180

ATTTGCCTGG CGGCACTAGC GCGGTGGTCC CACCTGACCC CATGCCGAAC TCAGAAGTGA 240

AACGCCGTAG CGCCGATGGT AGTGTGGGGT CTCCCCATGC GAGAGTAGGG AACTGCCAGG 300

CATCAAATTA GAAGTATGGC ATTAAC TTTC GGGGCAGTTC ACTACTCGAC AGAGAGTAGG 360

ACAAAAGCGA AAGCTTTTGA ACGTTGCGAA GCAACGGCCC GAAGGGTGAA TCACGAAGTG 420

ATTCATAAAC TGCCAGGCAT CAAATTAAGC AGTAAACTGA TGTA AAAATC AGTGGTTGTA 480

AAAGAATTCG GTGGAGCGG

499

>(77)C Amsterdam\_NoNCBImatch

CTGTTTTGGC GGTGAGAGAC GATTTTCAGC ACTGATTCAG AGTTGAGTAC GCAATAATTT 60

GCGCAGCAGC AAGGCGGCAA GCGAAGGAAA GGAAGGAGCA TACAGAAGTA TGTGACTGAG 120

TTTACGAGCG CAGGCAACGC CGCTGATGCG ATAAAGAATT GCGTACAGAG CACAAAGAAT 180

TTGCCTGGCG GCCGTAGCGC GGTGGTCCCA CCTGACCCCA TGCCGAACTC AGAAGTGAAA 240

CGCCGTAGCG CCGATGGTAG TGTGGGGTCT CCCCATGCGA GAGTAGGGAA CTGCCAGGCA 300

TCAAATTAGA AGTATGGCAT TAACTTTCGG GGCAGTTCAC TACTCGACAG AGAGTAGGAC 360

AAAAGCGAAA GCTTTTGAAC GTTGCGAAGC AACGGCCCGA AGGGTGAATC ACGAAGTGAT 420

TCATAAACTG CCAGGCATTA AATTGCAGTA AACCGGGATG AAAATCCGGG TTGTGACAAA 480

GAAATTCGGT GGAGCGG

497

>(78)C Taksony\_LR134146

ATGTTTTGGC GGATGAGAGA CGATTTTCAG CACTGATTCA GAGTTGAGTA CGCAATAATT 60

TGCGCAGCAG CAAGGCGGCA AGCGAAGAAA AGGAAGGAGC ATACAGAAGT ATGTGACTGA 120

CTTTACGAGC GCAGGCAACG CCGCTGATGC GATAAAGAAT TGCCTACTGA GCACAAAAGA 180

ATTTGCCTGG CGGCACTAGC GCGGTGGTCC CACCTGACCC CATGCCGAAC TCAGAAGTGA 240

AACGCCGTAG CGCCGATGGT AGTGTGGGGT CTCCCCATGC GAGAGTAGGG AACTGCCAGG 300

CATCAAATTA GAAGTATGGC ATTAAC TTTC GGGGCAGTTC ACTACTCGAC AGAGAGTAGG 360

ACAAAAGCGA AAGCTTTTGA ACGTTGCGAA GCAACGGCCC GAAGGGTGAA TCACGAAGTG 420

ATTCATAAAC TGCCAGGCAT CAAATTGCAG TAAACCGGGA TGAAAATCCG GGTGTGACA 480

AAGAAATTCG GTGGAGCGG

499

>(79)C Oranienburg\_NoNCBI match

ATGTTTTGGC GGTGAGAAG ACAACAATTT TCAGCTCAGA TTCAGAGTCC GAAGGATTTT 60

ACGCTGAGAC AAGGCGGCAA ACGCAGCGAC GGAAGGAGCA TACAGAAGTA TGTGACTGAC 120

GCTCGGAAGA GCAGCCAACG CCGTATCAGT GTAAAAGACA CAGGACAGAG CACAAAGAAT 180

TTGCCTGGCG GCACTAGCGC GGTGGTCCCA CCTGACCCCA TGCCGAACTC AGAAGTGAAA 240

CGCCGTAGCG CCGATGGTAG TGTGGGGTCT CCCCATGCGA GAGTAGGGAA CTGCCAGGCA 300

TCAAATTAGA AGTATGGCAT TAACTTTCGG GGCAGTTCAC TACTCGACAG AGAGTAGGAC 360

AAAAGCGAAA GCTTTTGAAC GTTGCGAAGC AACGGCCCGA AGGGTGAATC ACGAAGTGAT 420

TCATAAACTG CCAGGCATCA AATTGCAGTA AACCGGGATG AAAATCCGGG TTGTGACAAA 480

GAAATTCGGT GGAGCGG

497

>(80)C IG\_6,8\_Genovar\_1678\_NoNCBImatch

ATGTTTTGGC GGATGAGAGA CGATTTTCAG CACTGATTCA GAGTTGAGTA CGCAATAATT 60

TGCGCAGCAG CAAGGCGGCA AGCGAAGGAA AGGAAGGAGC ATACAGAAGT ATGTGACTGA 120

CTTTACGAGC GCAGGCAACG CCGCTGATGC GATAAAGAAT TGCGTACAGA GCACAAAGAA 180

TTTGCCTGGC GGCCTAGCG CGGTGGTCCC ACCTGACCCC ATGCCGAACT CAGAAGTGAA 240

ACGCCGTAGC GCCGATGGTA GTGTGGGGTC TCCCCATGCG AGAGTAGGGA ACTGCCAGGC 300

ATCAAATTAG AAGTATGGCA TTAATTTTCG GGGCAGTTCA CTA CTGACA GAGAGTAGGA 360

CAAAAGCGAA AGCTTTTGAA CGTTGCGAAG CAACGGCCCCG AAGGGTGAAT CACGAAGTGA 420

TTCATAAACT GCCAGGCATC AAATTGCAGT AACCGGGAT GAAAATCCGG GTTGTGACAA 480

AGAAATTCGG TGGAGCGG

498

>(81)C Uganda\_CP051398

ATGTTTTGGC GGATGAGAAG ACGAACAATT TTCAGCACTG ATTCCGGATT TTCGGGAACG 60

AAAGATTTTA CGCTGAGGCA AGGCGGCAAA TGAAGGAAAG GAAGGAGCAT ACAGAAGTAT 120

GTGACTGACT TTACGAATGC AGCCAACGCA GCATCGGTGT AAAAGATTCG TTTCCGGCAA 180

CAGAATTTGC CTGGCGGCAC TAGCGCGGTG GTCCACCTG ACCCATGCC GAACTCAGAA 240

GTGAAACGCC GTAGCGCCGA TGGTAGTGTG GGGTCTCCCC ATGCGAGAGT AGGGAAGTGC 300

CAGGCATCAA ATTAAGCAGT AACTGATGT AAAAATCAGT GGTTGTAAAA GAATTCGGTG 360

GAGCGG 366

>(82)C Mississippi\_NoNCBImatch

ATGTTTTGGC GAAAGAGAAG ACAACAATTT TCAGCACTGA TTCAGAGTCC GAAGGATTTT 60

ACGCTGAGAC AAGGCGGCAA ACGCAGCGAC GGAAGGAGCA TACAGAAGTA TGTGACTGAC 120

GCCCGCAAGA GCAGCCAACG CCGTATCAGT GTAAAAGACA CAGGACAGAG CACAAAGAAT 180

TTGCCTGGCG GCACTAGCGC GGTGGTCCCA CCTGACCCCA TGCCGAACTC AGAAGTGAAA 240

CGCCGTAGCG CCGATGGTAG TGTGGGGTCT CCCCATGCGA GAGTAGGGAA CTGCCAGGCA 300

TCAAATTGCA GTAAACCGGG ATGAAAATCC GGGTGGTGAC AAAGAAATTC GGTGGAGCGG 360

>(83)C Litchfield\_NoNCBImatch

ATGTTTTGGC GGATTGAGAA GACAACAATT TTCAGCTCAG ATTCAGAGTC CGAAGGATTT 60

TACGCTGAGA CAAGGCGGCA AACGCAGCGA CGGAAGGAGC ATACAGAAGT ATGTGACTGA 120

CGCTCGCAAG AGCAGCCAAC GCGGTATCAG TGTAAGAGAC ACAGGACAGA GCACAAAGAA 180

TTTGCTGGC GGCCTAGCG CGGTGGTCCC ACCTGACCCC ATGCCGAACT CAGAAGTGAA 240

ACGCCGTAGC GCCGATGGTA GTGTGGGGTC TCCCCATGCG AGAGTAGGGA ACTGCCAGGC 300

ATCAAATTAG AAGTATGGCA TTAACCTTCG GGGCAGTTCA CTAATCGACA GAGAGTAGGA 360

CAAAGCGAA AGCTTTTGAA CGTTGCGAAG CAACGGCCCG AAGGGTGAAT CACGAAGTGA 420

TTCATAAACT GCCAGGCATC AAATTAAGCA GTAAACTGAT GTAAAAATCA GTGGTTGTAA 480

AAGAATTCGG TGGAGCGG

498

>(84)C Paratyphi\_B\_LR134233

ATGTTTTGGC GGAATGAGAA GACGAACAAT TTTCAGCACT GATTCCGGAT TTTCGGGAAC 60

GAAAGATTTT ACGCTGAGGC AAGGCGGCAA ATGAAGGAAA GGAAGGAGCA TACAGAAGTA 120

TGTGACTGAC TTTACGAATG CAGCCAACGC AGCATCGGTG TAAAAGATTC GTTTCTGGCA 180

ACAGAATTTG CCTGGCGGCA CTAGCGCGGT GGTCCACCT GACCCCATGC CGAACTCAGA 240

AGTGAAACGC CGTAGCGCCG ATGGTAGTGT GGGGTCTCCC CATGCGAGAG TAGGGAAGTG 300

CCAGGCATCA AATTAAGCAG TAAACTGATG TAAAAATCAG TGGTTGTAAA AGAATTCGGT 360

GGAGCGG

367

>(85)C Newport\_NoNCBImatch

ATGTTTTGGC GGTGAGAGA CGATTTTCAG CACTGATTCA GAGTTGAGTA CGCAATAATT 60

TGCGCAGCAG CAAGGCGGCA AGCGAAGGAA AGGAAGGAGC ATACAGAAGT ATGTGACTGA 120

CTTTACGAGC GCAGGCAACG CCGCTGATGC GATAAAGAAT TCGGTACAGA GCACAAAGAA 180

TTTGCTGGC GGCCTAGCG CGGTGGTCCC ACCTGACCCC ATGCCGAAC CAGAAGTGAA 240

ACGCCGTAGC GCCGATGGTA GTGTGGGGTC TCCCCATGCG AGAGTAGGGA ACTGCCAGGC 300

ATCAAATTAG AAGTATGGCA TTAACITTCG GGGCAGTTCA CTAICTGACA GAGAGTAGGA 360

CAAAAGCGAA AGCTTTTGAA CGTTGCGAAG CAACGGCCCC AAGGGTGAAT CACGAAGTGA 420

TTCATAAACT GCCAGGCATC AAATTGCAGT AAACCGGGAT GAAAATCCGG GTTGTGACAA 480

AGAAATTCGG TGGAGCGG

498

>(86)C Hadar\_CP082396

ATGTTTTGGC GGTGAGAGA CGATTTTCAG CTCAGATTCA GAGTCCGAAG GATTTTACGC 60

TGAGACAAGG CGGCAAACGC AGCGACGGAA GGAGCATACA GAAGTATGTG ACTGACGCTC 120



GCAAGAGCAG CCAACGCCGT ATCAGTGTA AAGACACAGG ACAGAGCACA AAGAATTTGC 180

CTGGCGGCAC TAGCGCGGTG GTCCACCTG ACCCATGCC GAACTCAGAA GTGAAACGCC 240

GTAGCGCCGA TGGTAGTGTG GGGTCTCCCC ATGCGAGAGT AGGGAAGTGC CAGGCATCAA 300

ATTAGAAGTA TGGCATTAA TTTCTGGGGCA GTTCACTACT CGACAGAGAG TAGGACAAAA 360

GCGAAAGCTT TTGAACGTTG CGAAGCAACG GCCCGAAGGG TGAATCACGA AGTGATTCAT 420

AAACTGCCAG GCATCAAATT AAGCAGTAAA CTGATGTAAA AATCAGTGGT TGTAAGAGAA 480

TTCGGTGGAG CGG

493

>(87)X Newport\_Bardo\_CP016010\_CP019404

GGAAGAGATA AGTGCTGAAA GCATCTAAGC ACGAACTTG CCCCAGAGATG AGTTCTCCCT 60

GAGACTTAGA GTCTCCTGAA GGAACGTTGA AGACGACGAC GTTGATAGGC CGGGTGTGTA 120

AGCGCAGCGA TGC GTT GAGC TAACCGGTAC TAATGAACCG TGAGGCTTAA CCTTACAACG 180

CCGAAGATGT TTTGGCGGAT GAGAGAAGAT TTTCAGCACT GATTCAGAGT TGAGTACGCA 240

ATAATTTGCG CAGCAGCAAG GCGGCAAGCG AAGGAAAGGA AGGAGCATAC AGAAGTATGT 300

GA CTGAGTTT ACGAGCGCAG GCAACGCCGC TGATGCGATA AAGAATTGCG TACAGAGCAC 360

AAAGAATTTG CCTGGCGGCA CTAGCGCGGT GGTCCACCT GACCCCATGC CGAACTCAGA 420

AGTGAAACGC CGTAGCGCCG ATGGTAGTGT GGGGTCTCCC CATGCGAGAG TAGGGAAGT 480

CCAGGCATCA AATTAGAAGT ATGGCATTAA CTTTCGGGGC AGTTCCTAC TCGACAGAGA 540

GTAGGACAAA AGCGAAAGCT TTTGAACGTT GCGAAGCAAC GGCCCGAAGG GTGAATCACG 600

AAGTGATTCA TAAACTGCCA GGCATCAAAT TGCAGTAAAC CGGGATGAAA ATCCGGGTTG 660

TGACAAAGAA ATTCGGTGGA GCGGTAGTTC AGTTGGTTAG AATACCTGCC TGTCACGCAG 720

GGGGTCGCGG GTTCGAGTCC CGTCCGTTCC GCCACTTATT AAGAGCCCTG AGCATTAGCT 780

CAGGGCTTTT TCTTTGCCTG CGATTTAATT ATTGCTCAAT TCGCAAAAAT CCTCTGCATT 840

TCTCGCTCTT TTTCTACAAA GCGCTGAAGG TCATAATCCC CTCAGTTAAC GAACATAGTG 900

ATTA AAAAGA GGAATTCTAT GACTATCCCT GCATTCGGTT TAGGTACTGT TCGCCTGAAA 960

GACGACGTGG TTATCGCTTC TGTGAAAACG GCGCTTGAAC TGGGCTACCG TGCTGTCGAC 1020

ACTGCGCAAA TCTATGATAA TGAAGCGGCT GTTGGACAGG CGATTACTGA GAGCGGCGTA 1080

CCACGTAGCG AGCTGTACAT CACCACCAAG ATCTGGATTG AAAACCTTAG CAAAGACAGC 1140

TAATCCAGC CTGAAAGAGA CCTGAAAAAC TCGGTACCGA TATGTCGATC TGACCCTGAT 1200

CACTGGCATC TCCGGTGATG CTGGGCTGTC GAAAATTATG CAGCATGCTG GAGCTAAAAA 1260

CAAGGCTGAT CGC

1273

>(88)C Rissen\_CP043509

ATGTTTTGGC GGATGAGAAG ACGATTTTCA GCACTGATTC AGAGTTGAGT ACGCAATAAT 60

TTGCGCAGCA GCAAGGCGGC AAGCGAAGGA AAGGAAGGAG CATAACAGAAG TATGTGACTG 120

AGTTTACGAG CGCAGGCAAC GCCGCTGATG CGATAAAGAA TTGCGTACTG AGCACAAAAG 180

AATTTGCCTG GCGGCCGTAG CGCGGTGGTC CCACCTGACC CCATGCCGAA CTCAGAAGTG 240

AAACGCCGTA GCGCCGATGG TAGTGTGGGG TTTCCCATG CGAGAGTAGG GAACTGCCAG 300

GCATCAAATT AGAAGTATGG CATTAACTTT CGGGGCAGTT CACTACTCGA CAGAGAGTAG 360

GACAAAAGCG AAAGCTTTTG AACGTTGCGA AGCAACGGCC CGAAGGGTGA ATCACGAAGT 420

GATTCATAAA CTGCCAGGCA TCAAATTAAG CAGTAACTG ATGTAAAAT CAGTGTTGT 480

AAAAGAATTC GGTGGAGCGG

500

>(89)C Livingstone\_NoNCBI match

ATGTTTTGGC GGTTGAGAGA TGATTTTCAG CACTGATTCA GAGTTGAGTA CGCAATAATT 60

TGCGCAGCAG CAAGGCGGCA AGCGAAGGAA AGGAAGGAGC ATACAGAAGT ATGTGACTGA 120

GTTTACGAGC GCAGGCAACG CCGCTGATGC GATAAAGAAT TGCGTACAGA GCACAAAAGAA 180

TTGCTGGC GGCCTAGCG CGGTGGTCCC ACCTGACCCC ATACCGAACT CAGAAGTGAA 240

ACGCCGTAGC GCCGATGGTA GTGTGGGGTC TCCCATGCG AGAGTAGGGA ACTGCCAGGC 300

ATCAAATTAG AAGTATGGCA TTAACITTCG GGGCAGTTCA CTAICTGACA GAGAGTAGGA 360

CAAAAGCGAA AGCTITTTGAA CGTTGCGAAG CAACGGCCCC AAGGGTGAAT CACGAAGTGA 420

TTCATAAACT GCCAGGCATC AAATTGCAGT AAICTGATGT AAAAATCAGT GGTTGTAAAA 480

GAATTCGGTG GAGCGG

496

>(90)C IG\_rough\_Genovar\_9261\_NoNCBImatch

ATGTTTTGGC GGATGAGAGA TGATTTTCAG CACTGATTCC GGATTTTCGG GAACGAAAGA 60

TTTTACGCTG AGGCAAGGCG GCAAATGAAG GAAAGGAAGG AGCATACAGA AGTATGTGAC 120

TGACTTTGCG AATGCAGCCA ACGCAGCATC GGTGTAAAAG ATTCGTTTCC GGCAACAGAA 180

TTGCTGGC GGCCTAGCG CGGTGGTCCC ACCTGACCCC ATGCCGAACT CAGAAGTGAA 240

ACGCCGTAGC GCCGATGGTA GTGTGGGGTC TCCCATGCG AGAGTAGGGA ACTGCCAGGC 300

ATCAAATTAG AAGTATGGCA TTAACITTCG GGGCAGTTCA CTAICTGACA GAGAGTAGAA 360

CAAAAGCGAA AGCTITTTGAA CGTTGCGAAG CAACGGCCCC AAGGGTGAAT CACGAAGTGA 420

TTCATAAACT GCCAGGCATC AAATTGCAGT AAACCGGGAT GAAAATCCGG GTTGTGACAA 480

AGAAATTCGG TGGAGCGG

498

>(91)C Bareilly\_NoNCBImatch

ATGTTTTGGC GGATGAGAGA CGATTTTCAG CACTGATTCA GAGTTGAGTA CGCAATAATT 60

TGCGCAGCAG CAAGGCGGCA AGCGAAGGAA AGGCAGGAGC ATACAGAAGT ATGTGACTGA 120

CTTTACGAGC GCAGGCAACG CCGCTGATGC GATAAAGAAT TGCGTACAGA GCACAAAAGA 180

ATTTGCCTGG CGGCACTAGC GCGGTGGTCC CACCTGACCC CATGCCGAAC TCAGAAGTGA 240

AACGCCGTAG CGCCGATGGT AGTGTGGGGT CTCCCCATGC GAGAGTAGGG AACTGCCAGG 300

CATCAAATTA GAAGTATGGC ATTAAC TTTC GGGGCAGTTC ACTACTCGAC AGAGAGTAGG 360

ACAAAAGCGA AAGCTTTTGA AC GTT GCGAA GCAACGGCCC GAAGGGTGAA TCACGAAGTG 420

ATTCATAAAC TGCCAGGCAT CAATTTAAGC AGTAACTGA TGTA AAAATC AGTGATTGTA 480

AAAGAATTCG GTGGAGCGG

499

>(92)X Saintpaul\_Stanleyville\_CP017727\_CP034716

GAAGAGATAA GTGCTGAAAG CATCTAAGCA CGAACTTGC CCCGAGATGA GTTCTCCCTG 60

AGACTTAGAG TCTCCTGAAG GAACGTTGAA GACGACGACG TTGATAGGCC GGGTGTGTAA 120

GCGCAGCGAT GCGTTGAGCT AACCGGTACT AATGAACCGT GAGGCTTAAC CTTACAACGC 180

CGAAGCTGTT TTGGCGGATG AGAGACGATT TTCAGCACTG ATTCCGGATT TTCGGGAACG 240

AAAGATTTTA CGCTGAGGCA AGGCGGCAAA TGAAGGAAAG GAAGGAGCAT ACAGAAGTAT 300

GTGACTGACT TTGCGAATGC AGCCAACGCA GCATCGGTGT AAAAGATTCG TTTCCGGTAA 360

CAGAATTTGC CTGGCGGCAC TAGCGCGGTG GTCCACCTG ACCCATGCC GAACTCAGAA 420

GTGAAACGCC GTAGCGCCGA TGGTAGTGTG GGGTCTCCCC ATGCGAGAGT AGGGAAGTGC 480

CAGGCATCAA ATTAAGCAGT AACTGATGT AAAAATCAGT GGTTGTAAAA GAATTCGGTG 540

GAGCGGTAGT TCAGTTGGTT AGAATACCTG CCTGTACGC AGGGGGTCGC GGGTTCGAGT 600

CCCGTCCGTT CCGCCACTTA TTAAGAGCCC TGAGCATTAG CTCAGGGCTT TTTCTTTGCA 660

TGTCATTTAA TTATTGCTCA ATTCGCAAAA ATCCTCTGCA TTTCTCGCTC TTTTCTGCA 720

AAGCGCTGAA GGCATAATC CCCTCAGTTA ACGAACATAG TGATTAAAAA GAGGAATTCT 780

ATGACTATCC CTGCATTCGG TTTAGGTACT TTTCGCCTGA AAGACGACGT GGTTATCGCT 840

TCTGTAAAA CGGCGCTTGA ACTGGGCTAC CGTGCTGTCG AACTGCACA GATCTATGAT 900

AATGAAGCGG CTGTTGGACA GGCGATTGCT GAGAGCGGCG TACCGCGTAG CGAGCTGTAC 960

ATCACCACCA AGATCTGGAT TGAAAACCTT AGCAAAGACA AGCTAATCCC AAGCCTGAAA 1020

GAGAGCCTGA AAAAAGTGGC TACCGAATAT GTCGATCTGA CGCTGATCCA CTGGCCATCT 1080

CCGGGTGATG CCGTGTCTGT CGAAGAATTT ATGCAGGCAT TGCTGGAAGC TAAAAACAAG 1140

GGCTGACTCG CGAAATTGGC ATTTCAACTT CACCATTCCG TTGATGAAAA AGCTATTGCC 1200

GCGGGGGCGC AGACATATCG CACCACCAGA TGAGCTTTCT CCGATCTCAG ATCTAAGGGT 1260

GAGTGGGCGA 1270

>(93)C Babelberg\_NoNCBImatch

ATGTTTTGGC GGTGAGAGAC GATTTTCAGC ACTGATTCAG AGTTGAGTAC GCAATAATTT 60

GCGCAGCAGC AAGGCGGCAA GCGAAGGAAA GGAAGGAGCA TACAGAAGTA TGTGACTGAG 120

TTTACGAGCG CAGGCAACGC CGCTGATGCG ATAAAGAATT GCGTACAGAG CACAAAGAAT 180

TTGCCTGGCG GCACTAGCGC GGTGGTCCCA CCTGACCCCA TGCCGAACTC AGAAGTGAAA 240

CGCCGTAGCG CCGATGGTAG TGTGGGGTCT CCCCATGCGA GAGTAGGGAA CTGCCAGGCA 300

TCAAATTAGA AGTATGGCAT TAACTTTCGG GGCAGTTCAC TACTCGACAG AGAGTAGGAC 360

AAAAGCGAAA GCTTTTGAAC GTTGCGAAGC AACGGCCCGA AGGGTGAATC ACGAAGTGAT 420

TCATAAACTG CCAGGCATCA AATTGCAGTA AACCGGGATG AAAATCCGGG TGGTGACAAA 480

GAAATTCGGT GGAGCGG

497

>(94)C Montevideo\_CP074322

ATGTTTTGGC GGTTGAGAGA CGATTTTCAG CACTGATTCA GAGTTGAGTA CGCAATAATT 60

TGCGCAGCAG CAAGGCGGCA AGCGAAGGAA AGGAAGGAGC ATACAGAAGT ATGTGACTGA 120

CTTTACGAGC GCAGGCAACG CCGCTGATGC GATAAAGAAT TCGGTACAGA GCACAAAGAA 180

TTTGCTGGC GGCCTAGCG CGGTGGTCCC ACCTGACCCC ATGCCGAAC T CAGAAGTGAA 240

ACGCCGTAGC GCCGATGGTA GTGTGGGGTC TCCCATGCG AGAGTAGGGA ACTGCCAGGC 300

ATCAAATTAG AAGTATGGCA TTAAC TTTTCG GGGCAGTTCA C TACTCGACA GAGAGTAGGA 360

CAAAAGCGAA AGCTTTTGAA CGTTGCGAAG CAACGGCCCC AAGGGTGAAT CACGAAGTGA 420

TTTATAAACT GCCAGGCATC AAATTAAGCA GTAAACTGAT GTAAAAATCA GTGGTTGTAA 480

AAGAATTCGG TGGAGCGG

498

>(95)C Oranienburg\_NoNCBI match

ATGTTTTGGC GGATTGAGAG ATGATTTTCA GCACTGATTC AGAGTTGAGT ACGCAATAAT 60

TTGCGCAGCA GCAAGGCGGC AAGCGAAGGA AAGGAAGGAG CATA CAGAAG TATGTGACTG 120



ACTTTACGAG CGCAGGCAAC GCCGCTGATG CGATAAAGAA TTGCGTACTG AGCATAAAAG 180

AATTTGCCTG GCGGCAGTAG CGCGGTGGTC CCACCTGACC CCATGCCGAA CTCAGAAGTG 240

AAACGCCGTA GCGCCGATGG TAGTGTGGGG TCTCCCATG CGAGAGTAGG GAACTGCCAG 300

GCATCAAATT AAGCAGTAAG CCGGTCATAA AACCGGTGGT TGTAAGAGAA TTCGGTGGAG 360

CGG 363

>(96)C Idikan\_NoNCBI match

ATGTTTTGGC GGTGAGAGA AGATTTTCAG CACTGATTCC GGATTTTCGG GAACGAAAGA 60

TTTTACGCTG AGGCAAGGCG GCAAATGAAG GAAAGGAAGG AGCATACAGA AGTATGTGAC 120

TGACTTTGCG AATGCAGCCA ACGCAGCATC GGTGTAAAAG ATTCGTTTCC GGTAACAGAA 180

TTTGCCTGGC GGCAGTAGCG CGGTGGTCCC ACCTGACCCC ATGCCGAAC CAGAAGTGAA 240

ACGCCGTAGC GCCGATGGTA GTGTGGGGTC TCCCATGCG AGAGTAGGGA ACTGCCAGGC 300

ATCAAATTAG AAGTATGGCA TTAACITTCG GGGCAGTTCA CACTCGACA GAGAGTAGGA 360

CAAAGCGAA AGCTTTTGAA CGTTGCGAAG CAACGGCCCC AAGGGTGAAT CACGAAGTGA 420

TTCATAAACT GCCAGGCATC AAATTAAGCA GTAAACTGAT GTAAAAATCA GTGGTTGTAA 480

AAGAATTCGG TGGAGCGG

498

>(97)X Manchester\_CP019414

CCGGTAGCTA AATGCGGAAG AGATAAGTGC TGAAAGCATC TAAGCACGAA ACTTGCCCCG 60

AGATGAGTTC TCCCTGAGAC TTTAGGTCTC CTGAAGGAAC GTTGAAGACG ACGACGTTGA 120

TAGGCCGGGT GTGTAAGCGC AGCGATGCGT TGAGCTAACC GGTACTAATG AACCGTGAGG 180

CTTAACCTTA CAACGCCGAA GATGTTTTGG CGGATGAGAG ATGATTTTCA GCACTGATTC 240

AGAGTTGAGT ACGCAATAAT TTGCGCAGCA GCAAGGCGGC AAGCGAAGGA AAGGAAGGAG 300

CATACAGAAG TATGTGACTG AGTTTACGAG CGCAGGCAAC GCCGCTGATG CGATAAAGAA 360

TTGCGTACAG AGCACAAAGA ATTTGCCTGG CGGCACTAGC GCGGTGGTCC CACCTGACCC 420

CATGCCGAAC TCAGAAGTGA AACGCCGTAG CGCCGATGGT AGTGTGGGGT CTCCCCATGC 480

GAGAGTAGGG AACTGCCAGG CATCAAATTA GAAGTATGGC ATTAACCTTC GGGGCAGTTC 540

ACTACTCGAC AGAGAGTAGG ACAAAGCGA AAGCTTTTGA ACGTTGCGAA GCAACGGCCC 600

GAAGGGTGAA TCACGAAGTG ATTCATAAAC TGCCAGGCAT CAAATTAAGC AGTAAACTGA 660

TGTAAAAATC AGTGGTTGTA AAAGAATTCG GTGGAGCGGT AGTTCAGTTG GTTAGAATAC 720

CTGCCTGTCA CGCAGGGGGT CGCGGGTTCG AGTCCCGTCC GTTCCGCCAC TTATTAAGAG 780

CCCTGAGCAT TAGCTCAGGG CTTTTTCTTT GCCTGTCATT TAATTATTGC TCAATTCGCA 840

AAAATCCTCT GCATTTCTCG CTCTTTTTCT GCAAAGCGCT GAAGGTCATA ATCCCCTCAG 900

TTAACGAACA TAGTGATTAA AAAGAGGAAT TCTATGACTA TCCCTGCATT CGGTTTAGGT 960

ACTTTTCGCC TGAAAGACGA CGTGGTTATC GCTTCTGTTA AAACGGCGCT TGAAGTGGGC 1020

TACCGTGCTG TCGACACTGC GCAAATCTAT GATAATGAAG CGGCTGTTGG ACAGGCGATT 1080

GCTGAGAGCG GCGTACCGCG TAATGAGCTG TACATCACCA CCAAGATCTG GATT 1134

>(98)C Give\_LS483463

ATGTTTTGGC GGATTGAGAG ATGATTTTCA GCACTGATTC AGATTACATC AGAACGTAAA 60

AACGGTCTGA TAACAGAATT TGCCTGGCGG CAGTAGCGCG GTGGTCCCAC CTGACCCCAT 120

GCCGAACTCA GAAGTGAAAC GCCGTAGCGC CGATGGTAGT GTGGGGTCTC CCCATGCGAG 180

AGTAGGGAAC TGCCAGGCAT CAAATTAGAA GTATGGCATT AACTTTCGGG GCAGTTCACT 240

ACTCGACAGA GAGTAGGACA AAAGCGAAAG CTTTTGAACG TTGCGAAGCA ACGGCCCGAA 300

GGGTGAATCA CGAAGTGATT CATAAACTGC CAGGCATCAA ATTAAGCAGT AAGCCGGTCA 360

TAAACCGGTG GTTGTAAGAA AATTCGGTGG AGCGG 395

>(99)X\_Brandenburg\_Eastbourne\_Reading\_Sandiego\_CP030002\_CP075115\_CP093134\_CP075039

TCGGTACGCA GTTTTTTCAG GCTCTCTTC AGGCTTGGGA TCAGCTTGTC TTTGCTAAGG 60

TTTTCAATCC AGATCTTAGT GGTGATGTAC AGCTCATTAC GCGGTACGCC GCTCTCAGCA 120

ATCGCCTGTC CAACAGCAAC TTCATTATCA TAGATTTGCG CAGTGTCGAC AGCACGGTAG 180

CCCAGTTCAA GCGCCGTTTT CACAGAAGCG ATAACCACGT CGTCTTTCAG GCGAAAAGTA 240

CCTAAACCGA ATGCAGGGAT AGTCATAGAA TTCCTCTTTT TAATCACTAT GTTCGTTAAC 300

TGAGGGGATT ATGACCTTCA GCGCTTTGTA GAAAAAGAGC GAGAAATGCA GAGGATTTTT 360

GCGAATTGAG CAATAATTAA ATGACAGGCA AAGAAAAAGC CCTGAGCTAA TGCTCAGGGC 420

TCTTAATAAG TGGCGGAACG GACGGGACTC GAACCCGCGA CCCCTGCGT GACAGGCAGG 480

TATTCTAACC AACTGAACTA CCGCTCCACC GAATTTTTTT ACAACCACCA GTTTATGACC 540

GGCTTACTGC TTAATTTGAT GCCTGGCAGT TTATCAATCA CTCGTGATT CACCCTTCGG 600

GCCGTTGCTT CGCAACGTTT AAAAGCTTTC GCTTTTGTCC TACTCTCTGT CGAGTAGTGA 660

ACTGCCCCGA AAGTTAATGC CATACTTCTA ATTTGATGCC TGGCAGTTCC CTA CTCTCTCGC 720

ATGGGGAGAC CCCACACTAC CATCGGCGCT ACGGCGTTTC ACTTCTGAGT TCGGCATGGG 780

GTCAGGTGGG ACCACCGCGC TAGTGCCGCC AGGCAAATTC TGTTGCCAGA AACGAATCTC 840

TTATCTTTCG TTCCCGAAAA TCCGGAATCA GTGCTGAAAA TCGTCTCTCA ATCCGCCAAA 900

ACATCTTCGG CGTTGTAAGG TTAAGCCTCA CGGTTTATTA GTACCGGTTA GCTCAACGCA 960

TCGCTGCGCT TACACACCCG GCCTATCAAC GTCGTCGTCT TCAACGTTCC TTCAGGAGAC 1020

TCTAAGTCTC AGGGAGAACT CATCTCGGGG CAAGTTTCGT GCTTAGATGC TTTCAGCACT 1080

TATCTCTTCC GCATTTAGCT ACCGGGCAGT GCCATTGGCA TGACAACCCG AACACCAGTG 1140

ATGCGTCCAC TCCGGTCCTC TCGTACTAGG AGCAGCCCCC CTCAGTTCTC CAGCGCCAC 1200

GGCAGATAGG GACCGAACTG TCTCACGACG TTCTAAACCC AGCTCGCGTA CCACTTTAAA 1260

TGGCGAACAG CCATACCCTT GGGACCTACT TCAGCCCCAG GATGTGATGA GCCGACATCG 1320

AGGTGCCAAA CACCGCCGTC GATATGAACT CTTGGGCGGT ATCAGCCTGT TATCCCCGGA 1380

GTACCTTTTA TCCGTTGAGC GATG

1404

>(100)C Cubana\_NoNCBImatch

ATGTTTTGGC GGTTGAGAGA CGATTTTCAG CAGTGATTCA GAGTTGAGTA CGCAATGATT 60

TGCGCAGCAG CAAGGCGGCA AGCGAAGGAA AGGAAGGAGC ATACTGAAGT ATGTGACTGA 120

CTTACGAGC GCAGGCAACG CCGCTGATGC GATAAAGAAT TGCGTACAGA GCACAAAGAA 180

TTTGCTGGC GGCCGTAGCG CGGTGGTCCC ACCTGACCCC ATGCCGAAC T CAGAAGTGAA 240

ACGCCGTAGC GCCGATGGTA GTGTGGGGTC TCCCATGCG AGAGTAGGGA ACTGCCAGGC 300

ATCAAATTAG AAGTATGGCA TTAAC TTTCG GGGCAGTTCA C TACTCGACA GAGAGTAGGA 360

CAAAAGCGAA AGCTTTTGAA CGTTGCGAAG CAACGGCCCG AAGGGTGAAT CACGAAGTGA 420

TTCATAAACT GCCAGGCATC AAATTAAGCA GTAAACTGAT GTAAAAATCA GTGGTTGTAA 480

AAGAATTCGG TGGAGCGG 498

>(101)C Pomona\_CP019186

ATGTTTTGGC GGATGAGAGA TGATTTTCAG CGCTGATTCA GATTACATCA GAACGTAAAA 60

ACGGTCTGAT AACAGAATTT GCCTGGCGGC ACTAGCGCGG TGGTCCCACC TGACCCCATG 120

CCGAACTCAG AAGTGAAACG CCGTAGCGCC GATGGTAGTG TGGGGTCTCC CCATGCGAGA 180

GTAGGGA ACT GCCAGGCATC AAATTAGAAG TATGGCATTACTTTTCGGGG CAGTTCACTA 240

CTCGACAGAG AGTAGGACAA AAGCGAAAGC TTTTGAACGT TGCGAAGCAA CGGCCCGAAG 300

GGTGAATCAC GAAGTGATTC ATAACTGCC AGGCATCAAA TTAAGCAGTA AGCCGGTCAT 360

AAACTGGTGG TTGTAAAAAA ATTCGGTGGG GCGG 394

>(102)C Orion\_NoNCBI match

ATGTTTTGGC GGATGAGAAG ACGATTTTCA GCAGTGATTC AGAGTTGAGT ACGCAATAAT 60

TTGCGCAGCA GCAAGGCGGC AAGCGAAGGA AAGGAAGGAG CATAACAGAAG TATGTGACTG 120

AGTTTACGAG CGCAGGCAAC GCCGCTGATG CGATAAAGAA TTGCGTACAG AGCACAAAGA 180

ATTTGCCTGG CGGCACTAGC GCGGTGGTCC CACCTGACCC CATGCCGAAC TCAGAAAGTGA 240

AACGCCGTAG CGCCGATGGT AGTGTGGGGT CTCCCCATGC GAGAGTAGGG AACTGCCAGG 300

CATCAAATTA AGCAGTAAGC CGGTCATAGA CTGGTGGTTG TAAAAGAATT CGGTGGAGCG 360

G

361

>(103)C Adelaide\_NoNCBI match

ATGTTTTGGC GGATGAGAGA CGATTTTCAG CACTGATTCA GAGTTGAGTA CGCAATAATT 60

TGCGCAGCAG CAAGGCGGCA AGCGAAGGAA AGGAAGGAGC ATACAGAAGT ATGTGACTGA 120

GTTTACGAGC GCAGGCAACG CCGCTGATGC GATAAAGAAT TGCCTACAGA GCACAAAGAA 180

TTTGCCTGGC GGCCTAGCG CGGTGGTCCC ACCTGACCCC ATGCCGAAC TCAAAGTGAA 240

ACGCCGTAGC GCCGATGGTA GTGTGGGGTC TCCCCATGCG AGAGTAGGGA ACTGCCAGGC 300

ATCAAATTAG AAGTATGGCA TTAACCTTCG AGGCAGTTCA CTAACGACA GAGAGTAGGA 360

CAAAGCGAA AGCTTTTGAA CGTTGCGAAG CAACGGCCCG AAGGGGGAAT CACGAAGTGA 420

TTCATAAACT GCCAGGCATC AATTTAAGCA GTAAACTGAT GTAAAAATCA GTGATTGTAA 480

AAGAAATTCG GTGGAGCGG

499

>(104)C Liverpool\_NoNCBImatch

ATGTTTTGGC GGATGAGAGA CGATTTTCAG CACTGATTCC GGATTTTCGG GAACGAAAGA 60

TTTTACGCTG AGGCAAGGCG GAAAATGAAG GAAAGGAAGG AGCATACAGA AGTATGTGAC 120

TGACTTTGCG AATGCAGCCA ACGCAGCATC GGTGTAAAAG ATTCGTTTCC GGCAACAGAA 180

TTTGCCTGGC GGCACTAGCG CGGTGGTCCC ACCTGACCCC ATGCCGA ACT CAGAAGTGAA 240

ACGCCGTAGC GCCGATGGTA GTGTGGGGTC TCCCATGCG AGAGTAGGGA ACTGCCAGGC 300

ATCAAATTAA GCAGTAACT GATGTAAAAA TCAGTGTTG TAAAAGAATT CGGTGGAGCG 360

G

361

>(105)C Ouakam\_CP022116

ATGTTTTGGC GGATTGAGAA GACAACAATT TTCAGCTCAG ATTCAGAGTC CGAAGGATTT 60

TACGCTGAGA CAAGGCGGCA AACGCAGCGA CGGAAGGAGC ATACAGAAGT ATGTGACTGA 120

CGCCCGCAAG AGCAGCCAAC GCCGTATCAG TGTA AAAGAC ACAGGACAGA GCACAAAGAA 180



TTTGCCTGGC GGCCTAGCG CGGTGGTCCC ACCTGACCCC ATGCCGAAC CAGAAGTGAA 240

ACGCCGTAGC GCCGATGGTA GTGTGGGGTC TCCCCATGCG AGAGTAGGGA ACTGCCAGGC 300

ATCAAATTAG AAGTATGGCA TTAACITTCG GGGCAGTTCA CTAICTGACA GAGAGTAGGA 360

CAAAAGCGAA AGCTITTTGAA CGTTGCGAAG CAACGGCCCC AAGGGTGAAT CACGAAGTGA 420

TTCATAAACT GCCAGGCATC AAATTAAGCA GTAAACTGAT GTAAAAATCA GTGGTTGTAA 480

AAGAAATTCG GTGGAGCGG

499

>(106)C Gallinarum\_gallinarum\_CP088142

ATGTTTTGGC GGATGAGAAG ACGATTTTCA GCAGTGATTC AGAGTTGAGT ACGCAATAAT 60

TTGCGCAGCA GCAAGGCGGC AAGCGAAGGA AAGGAAGGAG CATA CAGAAG TATGTGACTG 120

AGTTTACGAG CGCAGGCAAC GCCGCTGATG CGATAAAGAA TTGCGTACAG AGCACAAAGA 180

ATTTGCCTGG CGGCTAGC GCGGTGGTCC CACCTGACCC CATGCCGAAC TCAGAAGTGA 240

AACGCCGTAG CGCCGATGGT AGTGTGGGGT CTCCCCATGC GAGAGTAGGG AACTGCCAGG 300

CATCAAATTA GAAGTATGGC ATTAACITTC GGGGCAGTTC ACTACTCGAC AGAGAGTAGG 360

ACAAAAGCGA AAGCTITTTGA ACGTTGCGAA GCAACGGCCC GAAGGGTGAATCACGAAGTG 420

ATTCATAAAC TGCCAGGCAT CAAATTGCAG TAAACCGGGA TGAAAATCCG GGTGTGACA 480

AAGAAATTCG GTGGAGCGG

499

>(107)C Muenchen\_NoNCBImatch

ATGTTTTGGC GGTTGAGAAG ACGATTTTCA GCACTGATTC AGATTACATC AGAACGTAAA 60

AACGGTCTGA TAACAGAATT TGCCTGGCGG CACTAGCGCG GTGGTCCCAC CTGACCCCAT 120

GCCGAACTCA GAAGTGAAAC GCCGTAGCGC CGATGGTAGT GTGGGGTCTC CCCATGCGAG 180

AGTAGGGAAC TGCCAGGCAT CAAATTAGAA GTATGGCATT AACTTTCGGG GCAGTTCACT 240

ACTCGACAGA GAGTAGGACA AAAGCGAAAG CTTTTGAACG TTGCGAAGCA ACGGCCCGAA 300

GGGTGAATCA CGAAGTGATT CATAAACTGC CAGGCATCAA ATTGCAGTAA ACCGGGATGA 360

AAATCCGGGT TGTGACAAAG AAATTCGGTG GAGCGG

396

>(108)C Lindenburg\_NoNCBImatch

ATGTTTTGGC GTTGAGAGAC GATTTTCAGA ACTGATTCAG AGTCCGAAGG ATTTTACGCT 60

GAGACAAGGC GGCAAACGCA GCGACGGAAG GAGCATAACAG AAGTATGTGA CTGACGCTCG 120

CAAGAGCAGC CAACGCCGTA TCAGTGTAAG AGACACAGGA CAGAGCACAA AGAATTTGCC 180

TGGCGGCACT AGCGCGGTGG TCCCACCTGA CCCCATGCCG AACTCAGAAG TGAAACGCCG 240

TAGCGCCGAT GGTAGTGTGG GGTCTCCCA TCGAGAGTA GGAACTGCC AGGCATCAA 300

TTAGAAGTAT GGCATTAAC TTCGGGGCAG TTCACTACTC GACAGAGAGT AGGACAAAAG 360

CGAAAGCTTT TGAACGTTGC GAAGCAACGG CCCGAAGGGT GAATCACGAA GTGATTCATA 420

AACTGCCAGG CATCAAATTG CAGTAAACCG GGATGAAAAT CCGGATTGTG ACAAAGAAAT 480

TCGGTGGAGC GG 492

>(109)C Typhimurium\_NoNCBImatch

ATGTTTTGGC GGTAAAGAGA AGATTTTCAG CACTGATTCC GGATTTTCGG GAACGAAAGA 60

TTTTACGCTG AGGCAAGGCG GCAAATGAAG GAAAGGAAGG AGCATACAGA AGTATGTGAC 120

TGACTTTGCG AATGCAGCCA ACGCAGCATC GGTGTAAAAG ATTCGTTTCT GGCAACAGAA 180

TTTGCCTGGC GGCCTAGCG CGGTGGTCCC ACCTGACCCC ATGCCGAAC CAGAAGTGAA 240

ACGCCGTAGC GCCGATGGTA GTGTGGGGTC TCCCATGCG AGAGTAGGGA ACTGCCAGGC 300

ATCAAATTAG AAGTATGGCA TTAACITTCG GGGCAGTTCA CTAICTGACA GAGAGTAGGA 360

CAAAGCGAA AGCTTTTGAA CGTTGCGAAG CAACGGCCCC AAGGGTGAAT CACGAAGTGA 420

TTCATAAACT GCCAGGCATC AAATTAAGCA GTAAACTGAT GTAAAAATCA GTGGTTGTAA 480

AAGAATTCGG TGGAGCGG 498

>(110)C Alabama\_NoNCBImatch

ATGTTTTGGC GGATGAGAAG ACGAACAATT TTCAGTACTG ATTCAGAGTT GAGTACGCAA 60

TAATTTGCGC AGCAGCAAGG CGGCAAGCGA AGGAAAGGAA GGAGCATACA GAAGTATGTG 120

ACTGAGTTTA CGAGCGCAGG CAACGCCGCT GATGCGATAA AGAATTGCGT ACAGAGCACA 180

AAGAATTTGC CTGGCGGCAC TAGCGCGGTG GTCCACCTG ACCCCATGCC GAACTCAGAA 240

GTGAAACGCC GTAGCGCCGA TGGTAGTGTG GGGTCTCCCC ATGCGAGAGT AGGGAAGTGC 300

CAGGCATCAA ATTAGAAGTA TGACATTAAC TTTCGGGGCA GTTCACTACT CGACAGAGAG 360

TAGGACAAAA GCGAAAGCTT TTGAACGTTG CGAAGCAACG GCCCGAAGGG TGAATCACGA 420

AGTGATTCAT AACTGCCAG GCATCAAATT ATAAGCAGTA AACTGATGTA AAAATCAGTG 480

GTTGTAAAAG AATTCGGTGG AGCGG 505

>(111)C Rubislaw\_CP074294

ATGTTTTGGC GGTGAGAAG ACAGATTTTC AGCACTGATT CAGATTACAT CAGAACGTAA 60

AAACGGTCTG ATAACAGAAT TTGCCTGGCG GCAGTAGCGC GGTGGTCCCA CCTGACCCCA 120

TGCCGAAGTCT AGAAGTGAAA CGCCGTAGCG CCGATGGTAG TGTGGGGTCT CCCCATGCGA 180

GAGTAGGGAA CTGCCAGGCA TCAATTTAAG CAGTAACTG ATGTAAAAAT CAGTGGTTGT 240

AAAAGAATTC GGTGGAGCGG

260

>(112)C Kiambu\_CP082587

ATGTTTTGGC GGATGAGAAG ACGATTTTCA GCACTGATTC CGGATTTTCG GGAACGAAAG 60

ATTTTACGCT GAGGCAAGGC GGCAAATGAA GGAAAGGAAG GAGCATACAG AAGTATGTGA 120

CTGACTTTAC GAATGCAGCC AACGCAGCAT CGGTGTAAAA GATTCGTTTC TGGCAACAGA 180

ATTTGCCTGG CGGCACTAGC GCGGTGGTCC CACCTGACCC CATGCCGAAC TCAGAAGTGA 240

AACGCCGTAG CGCCGATGGT AGTGTGGGGT CTCCCCATGC GAGAGTAGGG AACTGCCAGG 300

CATCAAATTA GAAGTATGGC ATTAAC TTTC GGGGCAGTTC ACTACTCGAC AGAGAGTAGG 360

ACAAAAGCGA AAGCTTTTGA ACGTTGCGAA GCAACGGCCC GAAGGGTGAA TCACGAAGTG 420

ATTCATAAAC TGCCAGGCAT CAAATTAAGC AGTAACTGA TGTA AAAATC AGTGGTTGTA 480

AAAGAATTCG GTGGAGCGG

499

>(113)C Agbeni\_NoNCBI match

ATGTTTTGGC GGATGAGAAG ACAGATTTTC AGCACTGATT CAGAGTTGAG TACGCAATAA 60

TTTGCGCAGC AGCAAGGCGG CAAGCGAAGG AAAGAAAGGA GCATACTGAA GTATGTGACT 120

GACTTTACGA GCGCAGGCAA CGCCGCTGAT GCGATAAAGA ATTGCGTACA GAGCACAAAG 180

AATTTGCCTG GCGGCCGTAG CGCGGTGGTC CCACCTGACC CCATGCCGAA CTCAGAAGTG 240

AAACGCCGTA GCGCCGATGG TAGTGTGGGG TCTCCCATG CGAGAGTAGG GAACTGCCAG 300

GCATCAAATT AGAAGTATGG CATTAACTTT CGGGGCAGTT CACTACTCGA CAGAGAGTAG 360

GACAAAAGCG AAAGCTTTTG AACGTTGCGA AGCAACGGCC CGAAGGGTGA ATCACGGAGT 420

GATTCATAAA CTGCCAGGCA TCAAATTAAG CAGTAACTG ATGTAAAAGT CAGTGGTTGT 480

AAAAGAATTC GGTGGAGCGG 500

>(114)C Typhimurium\_NoNCBImatch

ATGTTTTGGC GGATTGAGAA GACAACAATT TTCAGCTCAG ATTCAGAGTC CGAAGGATTT 60

TACGCTGAGA CAAGGCGGCA AACGCAGCGA CGGAAGGAGC ATACAGAAGT ATGTGACTGA 120

CGCTCGCAAG AGCAGCCAAC GCCGTATCAG TGTA AAAAGAC ACAGGACGGA GCACAAAGAA 180

TTTGCCTGGC GGCCGTAGCG CGGTGGTCCC ACCTGACCCC ATGCCGAACT CAGAAGTGAA 240

ACGCCGTAGC GCCGATGGTA GTGTGGGGTC TCCCATGCG AGAGTAGGGA ACTGCCAGGC 300

ATCAAATTAG AAGTATGGCA TTAAC TTTTCG GGGCAGTTCA C TACTCGACA GAGAGTAGGA 360

CAAAAGCGAA AGCTTTTGAA CGTTGCGAAG CAACGGCCCG AAGGGTGAAT CACGAAGTGA 420

TTCATAAACT GCCAGGCATC AAATTAAGCA GTAAACTGAT GTAAAAATCA GTGGTTGTAA 480

AAGAATTCGG TGGAGCGG 498

>(115)C Derby\_NoNCBImatch

ATGTTTTGGC GGATTGAGAA GACAACAATT TTCAGCTCAG ATTCAGAGTC CGAAGGATTT 60

TACGCTGAGA CAAGGCGGCA AACGCAGCGA CGGAAGGAGC ATACAGAAGT ATGTGACTGA 120

CGCTCGCAAG AGCAGCCAAC GCCGTATCAG TGTAAGAGAC ACAGGACAGA GCACAAAGAA 180

TTTGCCTGGC GGCAGTAGCG CGGTGGTCCC ACCTGACCCC ATGCCGAAGT CAGAAGTGAA 240

ACGCCGTAGC GCCGATGGTA GTGTGGGGTC TCCCCATGCG AGAGTAGGGA ACTGCCAGGC 300

ATCAAATTAG AAGTATGGCA TTAACITTCG GGGCAGTTCA CTAICTGACA GAGAGTAGGA 360

CAAAAGCGAA AGCTTTTGAA CGTTGCGAAG CAACGGCCCG AAGGGTGAAT CACGAAGTGA 420

TTCATAAACT GCCAGGCATC AAATTGCAGT AAACCAGGAT GAAAATCCGG GTTGTGACAA 480

AGAAATTCGG TGGAGCGG 498

>(116)C Nima\_NoNCBImatch

ATGTTTTGGC GGATTGAGAG AAGATTTTCA GCTCAGATTC AGAGTCCGAA GGATTTTACG 60

CTGAGACAAG GCGGCAAACG CAGCGACGGA AGGAGCATAC AGAAGTATGT GACTGACGTT 120

CGCAAGAGCA GCCAACGCCG TATCAGTGTA AAAGACACAG GACAGAGCAC AAAGAATTTG 180

CCTGGCGGCA CTAGCGCGGT GGTCCACCT GACCCCATGC CGAACTCAGA AGTGAAACGC 240

CGTAGCGCCG ATGGTAGTGT GGGGTCTCCC CATGCGAGAG TAGGGAAGT CCAGGCATCA 300

AATTAGAAGT ATGGCATTAA CTTTCGGGGC AGTTCACTAC TCGACAGAGA GTAGGACAAA 360

AGCGAAAGCT TTTGAACGTT GCGAAGCAAC GGCCCGAAGG GTGAATCACG AAGTGATTCA 420

TAAACTGCCA GGCATCAAAT TAAGCAGTAA GCCGGTCATA AACTGGTGGT TGTAACAAAA 480

TTCGGTGGAG CGG

493

>(117) Baranquilla\_NoNCBI match

ATGTTTTGGC GGTGAGAAG ACAACAATTT TCAGCTCAGA TTCAGAGTCC GAAGGATTTT 60

ACGCTGAGAC AAGGCGGCAA ACGCGGCGAC GGAAGGAGCA TACAGAAGTA TGTGACTGAC 120

GTTTCGAAGA GCAGCCAACG CCGTATCAGC GTAAAAGACA CAGGACAGAG CACAAAGAAT 180

TTGCCTGGCG GCACTAGCGC GGTGGTCCCA CCTGACCCCA TGCCGAACTC AGAAGTGAAA 240

CGCCGTAGCG CCGATGGTAG TGTGGGGTCT CCCCATGCGA GAGTAGGGAA CTGCCAGGCA 300



TCAATTTAAG CAGTAAACTG ATGTAAAAAT CAGTGGTTGT AAAAGAATTC GGTGGAGCGG 360

>(118)C Javiana\_CP074206

ATGTTTTGGC GGACTGAGAA GACGAACAAT TTTCAGCTTT GATTCAGAGT TGAGTACGCA 60

ATAATTTGCG CAGCAGCAAG GCGGCAAGCG AAGGAAAGGA AGGAGCATAC AGAAGTATGT 120

GACTGACTTT ACGAGCGCAG GCAACGCCGC TGATGCGATA AAGAATTGCG TACTGAGCAT 180

AAAAGAATTT GCCTGGCGGC AGTAGCGCGG TGGTCCCACC TGACCCCATG CCGAACTCAG 240

AAGTGAAACG CCGTAGCGCC GATGGTAGTG TGGGGTCTCC CCATGCGAGA GTAGGGAACT 300

GCCAGGCATC AAATTAAGCA GTAAGCCGGT CATAAACCGG TGGTTGTAAA AGAATCCGGT 360

GGAGCGG

367

>(119)X\_Agona\_Borreze\_Muenchen\_NC\_011149\_CP019407\_CP082684

CATCGCTCAA CGGATAAAAG GTACTCCGGG GATAACAGGC TGATACCGCC CAAGAGTTCA 60

TATCGACGGC GGTGTTTGGC ACCTCGATGT CGGCTCATCA CATCCTGGGG CTGAAGTAGG 120

TCCAAGGGT ATGGCTGTTC GCCATTTAAA GTGGTACGCG AGCTGGGTTT AGAACGTCGT 180

GAGACAGTTC GGTCCCTATC TGCCGTGGGC GCTGGAGAAC TGAGGGGGGC TGCTCCTAGT 240

ACGAGAGGAC CGGAGTGGAC GCATCACTGG TGTTCCGGTT GTCATGCCAA TGGCACTGCC 300

CGGTAGCTAA ATGCGGAAGA GATAAGTGCT GAAAGCATCT AAGCACGAAA CTTGCCCCGA 360

GATGAGTTCT CCCTGAGACT TAGAGTCTCC TGAAGGAACG TTGAAGACGA CGACGTTGAT 420

AGGCCGGGTG TGTAAGCGCA GCGATGCGTT GAGCTAACCG GTACTAATGA ACCGTGAGGC 480

TTAACCTTAC AACGCCGAAG ATGTTTTGGC GGATTGAGAA GACAACAATT TTCAGCTCAG 540

ATTCAGAGTC CGAAGGATTT TACGCTGAGA CAAGGCGGCA AACGCAGCGA CGGAAGGAGC 600

ATACAGAAGT ATGTGACTGA CGCTCGCAAG AGCAGCCAAC GCCGTATCAG TGTAAGGAC 660

ACAGGACAGA GCACAAAGAA TTTGCCTGGC GGCAGTAGCG CGGTGGTCCC ACCTGACCCC 720

ATGCCGAACT CAGAAGTGAA ACGCCGTAGC GCCGATGGTA GTGTGGGGTC TCCCATGCG 780

AGAGTAGGGA ACTGCCAGGC ATCAAATTAG AAGTATGGCA TTAACITTCG AGGCAGTTCA 840

CTACTCGACA GAGAGTAGGA CAAAAGCGAA AGCTTTTGAA TGTTGCGAAG CAACGGCCCCG 900

AAGGGTGAAT CACGAAGTGA TTCATAAACT GCCAGGCATC AAATTGCAGT AAACCAGGAT 960

GAAAATCCGG GTTGTGACAA AGAAATTCGG TGGAGCGGTA GTTCAGTTGG TTAGAATACC 1020

TGCCTGTCAC GCAGGGGGTC GCGGGTTCGA GTCCCGTCCG TTCCGCCACT TATTAAGAGC 1080

CCTGAGCATT AGCTCAGGGC TTTTCTTTG CATGTCATTT AATTATTGCT CAATTCGCAA 1140

AAATCCTCTG CATTCTCGC TCTTTTCTG CAAAGCGCTG AAGGTCATAA TCCCCTCAGT 1200

TAACGAACAT AGTGATTAAG AAGAGGAATT CTATGACTAT CCCTGCATTC GGTTTAGGTA 1260

CTTTTCGCCT GAAAGACGAC GTGGTTATCG CTTCTGTAA AACGGCGCTT GAACTAGGCT 1320

ACCGTGCTGT CGACACTGCG CAAATCTATG ATAATGAAGC GGCTGTTGGA CAGGCGATTG 1380

CTGAGAGCGG CGTACCGCGT AATGAGCTGT ACATCACCAC CAAGATCTGG ATTGAAAATC 1440

TTAGCAAAGA CAAGCTAATC CCAAGCCTGA AAGAGAGCCT GAAAAAACTG CGTACCGA 1498

>(120)C Havana\_CP074203

ATGTTTTGGC GGATGAGAGA CGATTTTCAG CACTGATTCA GAGTTGAGTA CGCAATAATT 60

TGCGCAGCAG CAAGGCGGCA AGCGAAGGAA AGGAAGGAGC ATACAGAAGT ATGTGACTGA 120

GTTTACGAGC GCAGGCAACG CCGCTGATGC GATAAAGAAT TCGTACAGA GCACAAAGAA 180

TTTGCTGGC GGCCGTAGCG CGGTGGTCCC ACCTGACCCC ATGCCGAAT CAGAAGTGAA 240

ACGCCGTAGC GCCGATGGTA GTGTGGGGTC TCCCCATGCG AGAGTAGGGA ACTGCCAGGC 300

ATCAAATTAG AAGTATGGCA TTAACCTTCG GGGCAGTTCA CTAATCGACA GAGAGCAGGA 360

CAAAAGCGAA AGCTTTTGAA CGTTGCGAAG CAACGGCCCG AAGGGTGAAT CACGAAGTGA 420

TTCATAAACT GCCAGGCATC AAATTAAGCA GTAAACTGAT GTAAAAATCA GTGGTTGTAA 480

AAGAATTCGG TGGAGCGG

498

>(121)C Anatum\_CP007211

ATGTTTTGGC GGATTGAGAA GACAACAATT TTCAGCTCAG ATTCAGAGTC CGAAGGATT 60

TACGCTGAGA CAAGGCGGCA AACGCAGCGA CGGAAGGAGC ATACAGAAGT ATGTGACTGA 120

CGCTCGCAAG AGCAGCCAAC GCCGTATCAG TGTAAGAC ACAGGACAGA GCACAAAGAA 180

TTTGCTGGC GGCCTAGCG CGGTGGTCCC ACCTGACCCC ATGCCGAAGT CAGAAGTGAA 240

ACGCCGTAGC GCCGATGGTA GTGTGGGGTC TCCCCATGCG AGAGTAGGGA ACTGCCAGGC 300

ATCAAATTAG AAGTATGGCA TTAACCTTCG GGGCAGTTCA CTAAGTACAGA GAGAGTAGGA 360

CAAAAGCGAA AGCTTTTGAA CGTTGCGAAG CAACGGCCCCG AAGAGTGAAT CACGAAGTGA 420

TTCATAAACT GCCAGGCATC AAATTAAGCA GTAAACTGAT GTAAAAATCA GTGGTTGTAA 480

AAGAATTCGG TGGAGCGG

498

>(122)C Bareilly\_Typhimurium\_Saintpaul\_Virchow\_CP045757\_CP045945\_CP023166\_CP020565

ATGTTTTGGC GGATGAGAGA CGATTTTCAG CACTGATTCA GAGTTGAGTA CGCAATAATT 60

TGCGCAGCAG CAAGGCGGCA AGCGAAGGAA AGGAAGGAGC ATACAGAAGT ATGTGACTGA 120

GTTTACGAGC GCAGGCAACG CCGCTGATGC GATAAAGAAT TCGTACAGA GCACAAAAGA 180

ATTTGCCTGG CGGCAGTAGC GCGGTGGTCC CACCTGACCC CATGCCGAAC TCAGAAGTGA 240

AACGCCGTAG CGCCGATGGT AGTGTGGGGT CTCCCCATGC GAGAGTAGGG AACTGCCAGG 300

CATCAAATTA GAAGTATGGC ATTAAC TTTC GGGGCAGTTC ACTACTCGAC AGAGAGTAGG 360

ACAAAAGCGA AAGCTTTTGA ACGTTGCGAA GCAACGGCCC GAAGGGTGAA TCACGAAGTG 420

ATTCATAAAC TGCCAGGCAT CAAATTGCAG TAAACCGGGA TGAAAATCCG GGTTGTGACA 480

AAGAAATTCG GTGGAGCGG

499

>(123)C Berta\_CP030005

ATGTTTTGGC GGATGAGAGA AGATTTTCAG CACTGATTCA GAGTTGAGTA CGCAATAATT 60

TGCGCAGCAG CAAGGCGGCA AGCGAAGGAA AGGAAGGAGC ATACAGAAGT ATGTGACTGA 120

GTTTACGAGC GCAGGCAACG CCGCTGATGC GATAAAGAAT TCGTACAGA GCACAAAGAA 180

TTTGCCTGGC GGCAGTAGCG CCGTGGTCCC ACCTGACCCC ATGCCGA ACT CAGAAGTGAA 240

ACGCCGTAGC GCCGATGGTA GTGTGGGGTC TCCCCATGCG AGAGTAGGGA ACTGCCAGGC 300

ATCAAATTAG AAGTATGGCA TTAAC TTTCG GGGCAGTTCA C TACTCGACA GAGAGTAGGA 360

CAAAAGCGAA AGCTTTTGA ACGTTGCGAAG CAACGGCCCG AAGGGTGAAT CACGAAGTGA 420

TTCATAAACT GCCAGGCATC AAATTGCAGT AAACCGGGAT GAAAATCCGG GTTGTGACAA 480

AGAAATTCGG TGGAGCGG

498

>(124)X Choleraesuis\_Gallinarum\_NC\_006905\_CP088134

GCGGAAGAGA TAAGTGCTGA AAGCATCTAA GCACGAACT TGCCCCGAGA TGAGTTCTCC 60

CTGAGACTTA GAGTCTCCTG AAGGAACGTT GAAGACGACG ACGTTGATAG GCCGGGTGTG 120

TAAGCGCAGC GATGCGTTGA GCTAACCGGT ACTAATGAAC CGTGAGGCTT AACCTTACAA 180

CGCCGAAGAT GTTTTGGCGG ATGAGAGACA ATTTTCAGCA CTGATTCAGA GTTGAGTACG 240

CAATAATTTG CGCAGCAGCA AGGCGGCAAG CGAAGGAAAG GAAGGAGCAT ACAGAAGTAT 300

GTGACTGACT TTACGAGCGC GGGCAACGCC GCTGATGCGA TAAAGAATTG CGTACTGAGC 360

ACAAAAGAAT TTGCCTGGCG GCACTAGCGC GGTGGTCCCA CCTGACCCCA TGCCGAAGTC 420

AGAAGTGAAA CGCCGTAGCG CCGATGGTAG TGTGGGGTCT CCCCATGCGA GAGTAGGGAA 480

CTGCCAGGCA TCAAATTAGA AGTATGGTAT TAACTTTCGG GGCAGTTCAC TACTCGACAG 540

AGAGTAGGAC AAAAGCGAAA GCTTTTGAAC GTTGCGAAGC AACGGCCCGA AGGGTGAATC 600

ACGAAGTGAT TCATAAACTG CCAGGCATCA AATTGCAGTA AACCGGGATG AAAATCCGGA 660

TTGTGACAAA GAAATTCGGT GGAGCGGTAG TTCAGTTGGT TAGAATACCT GCCTGTCACG 720

CAGGGGGTTCG CGGGTTCGAG TCCCGTCCGT TCCGCCACTT ATTAAGAGCC CTGAGCATT 780

GCTCAGGGCT TTTTCTTTGC CTGTCATTTA ATTATTGCTC AATTCGCAA AATCCTCTGC 840

ATTTCTCGCT CTTTTTCTAC AAAGCGCTGA AGGTCATAAT TCCCTCAGCT AACGAACATA 900

GTGATTA AAA AGAGGAATTC TATGACTATC CCTGCATTCG GTTTAGGTAC TTTTCGCCTG 960

AAAGACGACG TGGTTATCGC TTCTGTTAAA ACGGCGCTTG AACTGGGCTA CCGTGCTGTC 1020

GACTGTCAC AGATCTATGA TAATGAAGCG GCTGTTGGAC AGGCGATTGC TGAAAGCGGT 1080

GTACCACGTA ATGAGCTGTA CATCACCACC AAGATCTGGA TTGAAAACCT TAGCAAAGA 1139

>(125)C Cubana\_NC\_021818

ATGTTTTGGC GGTTGAGAGA AGATTTTCAG CACTGATTCA GATTACATCA GAACGTAAAA 60

ACGGTCTGAT AACAGAATTT GCCTGGCGGC ACTAGCACGG TGGTCCCACC TGACCCCATG 120

CCGAACTCAG AAGTGAAACG CCGTAGCGCC GATGGTAGTG TGGGGTCTCC CCATGCGAGA 180

GTAGGGA ACT GCCAGGCATC AAATTAGAAG TATGGCATT ACTTTGCGGG CAGTTCACTA 240

CTCGACAGAG AGTAGGACAA AAGCGAAAGC TTTTGAACGT TGCGAAGCAA CGGCCCGAAG 300

GGTGAATCAC GAAGTGATTC ATAACTGCC AGGCATCAAA TTAAGCAGTA AACTGATGTA 360

AAAATCAGTG GTTGATAAAG AATTCGGTGG AGCGG

395

>(126)C Dublin\_NC\_011205

ATGTTTTGGC GGATGAGAAG ACGATTTTCA GCAGTGATTC AGAGTTGAGT ACGCAATAAT 60

TTGCGCAGCA GCAAGGCGGC AAGCGAAGGA AAGGAAGGAG CATAACAGAAG TATGTGACTG 120

AGTTTACGAG CGCAGGCAAC GCCGCTGATG CGATAAAGAA TTGCGTACAG AGCACAAAGA 180

ATTTGCCTGG CGGCACTAGC GCGGTGGTCC CACCTGACCC CATGCCGAAC TCAGAAGTGA 240

AACGCTGTAG CGCCGATGGT AGTGTGGGGT CTCCCCATGC GAGAGTAGGG AACTGCCAGG 300

CATCAAATTA GAAGTATGGC ATTAAC TTTC GGGGCAGTTC ACTACTCGAC AGAGAGTAGG 360

ACAAAAGCGA AAGCTTTTGA ACGTTGCGAA GCAACGGCCC GAAGGGTGAA TCACGAAGTG 420

ATTCATAAAC TGCCAGGCAT CAAATTGCAG TAAACCGGGA TGAAAATCCG GGTTGTGACA 480

AAGAAATTCG GTGGAGCGG

499

>(127)X Enteritidis\_Newlands\_Javiana\_Typhimurium\_NC\_011294\_CP019416\_CP074314\_CP019383

GAAGAGATAA GTGCTGAAAG CATCTAAGCA CGAAACTTGC CCCGAGATGA GTTCTCCCTG 60

AGACTTAGAG TCTCCTGAAG GAACGTTGAA GACGACGACG TTGATAGGCC GGGTGTGTAA 120



GCGCAGCGAT GCGTTGAGCT AACCGTACT AATGAACCGT GAGGCTTAAC CTTACAACGC 180

CGAAGATGTT TTGGCGGATG AGAAGACGAT TTTCAGCAGT GATTCAGAGT TGAGTACGCA 240

ATACTTTGCG CAGCAGCAAG GCGGCAAGCG AAGGAAAGGA AGGAGCATAC AGAAGTATGT 300

GACTGAGTTT ACGAGCGCAG GCAACGCCGC TGATGCGATA AAGAATTGCG TACAGAGCAC 360

AAAGAATTTG CCTGGCGGCA CTAGCGCGGT GGTCCACCT GACCCCATGC CGAACTCAGA 420

AGTGAAACGC CGTAGCGCCG ATGGTAGTGT GGGGTCTCCC CATGCGAGAG TAGGGAAGT 480

CCAGGCATCA AATTAGAAGT ATGGCATTAA CTTTCGGGGC AGTTCCTAC TCGACAGAGA 540

GTAGGACAAA AGCGAAAGCT TTTGAACGTT GCGAAGCAAC GGCCCGAAGG GTGAATCACG 600

AAGTGATTCA TAAACTGCCA GGCATCAAAT TGCAGTAAAC CGGGATGAAA ATCCGGGTTG 660

TGACAAAGAA ATTCGGTGGA GCGGTAGTTC AGTTGGTTAG AATACCTGCC TGTCACGCAG 720

GGGGTCGCGG GTTCGAGTCC CGTCCGTTCC GCCACTTATT AAGAGCCCTG AGCATTAGCT 780

CAGGGCTTTT TCTTTGCATA TCATTTAATT ATTGCTCAAT TCGCAAAAAT CCTCTGCATT 840

TCTCGCTCTT TTTCTACAAA GCGCTGAAGG TCATAATCCC CTCAGTTAAC GAACATAGTG 900

ATTAAAAAGA GGAATTCTAT GACTATCCCT GCATTCGGTT TAGGTACTTT TCGCCTGAAA 960

GACGACGTGG TTATCGCTTC TGTGAAAACG GCGCTTGAAC TGGGCTACCG TGCTGTGAC 1020

ACTGCGCAAA TCTATGATAA TGAAGCGGCT GTTGGACAGG CGATTGCTGA GAGCGGCGTA 1080

CCGCGTAATG AGCTGTACAT CACCACCAAG ATCTGGATTG AAAACCTTAG CAAAGACAAG 1140

CTAATCCCAG CCTGAAAGAG AGCCTGAAAA ACTGCGTACC GATATGTCGA TCTGACGCTG 1200

ATCACTGGCC 1210

>(128)C Gallinarum-gallinarum\_NC\_011274

ATGTTTTGGC GGATGAGAGA AGATTTTCAG CAGTGATTCA GAGTTGAGTA CGCAATACTT 60

TGCGCAGCAG CAAGGCGGCA AGCGAAGGAA AGGAAGGAGC ATACAGAAGT ATGTGACTGA 120

GTTTACGAGC GCAGGCAACG CCGCTGATGC GATAAAGAAT TCGGTACAGA GCACAAAGAA 180

TTTGCCTGGC GGCAGTAGCG CGGTGGTCCC ACCTGACCCC ATGCCGAACT CAGAAGTGAA 240

ACGCCGTAGC GCCGATGGTA GTGTGGGGTC TCCCATGCG AGAGTAGGGA ACTGCCAGGC 300

ATCAAATTAG AAGTATGGCA TTAACITTCG GGGCAGTTCA CTAICTGACA GAGAGTAGGA 360

CAAAAGCGAA AGCTTTTGAA CGTTGCGCAG CAACGGCCCG AAGGGTGAAT CACGAAGTGA 420

TTCATAAACT GCCAGGCATC AAATTGCAGT AAACCGGGAT GAAAATCCGG GTTGTGACAA 480

AGAAATTCGG TGGAGCGG

498

>(129)X Gallinarum-pullorum\_NC\_022221

CGGAAGAGAT AAGTGCTGAA AGCATCTAAG CACGAACTT GCCCGAGAT GAGCTCTCCC 60

TGAGACTTAG AGTCTCCTGA AGGAACGTTG AAGACGACGA CGTTGATAGG CCGGGTGTGT 120

AAGCGCAGCG ATGCGTTGAG CTAACCGGTA CTAATGAACC GTGAGGCTTA ACCTTACAAC 180

GCCGAAGATG TTTTGCGGGA TGAGAGACGA TTTTCAGCAG TGATTCAGAG TTGAGTACGC 240

AATAATTTGC GCAGCAGCAA GGCGGCAAGC GAAGGAAAGG AAGGAGCATA CAGAAGTATG 300

TGACTGAGTT TACGAGCGCA GGCAACGCCG CTGATGCGAT AAAGAATTGC GTACAGAGCA 360

CAAAGAATTT GCCTGGCGGC AGTAGCGCGG TGGTCCCACC TGACCCCATG CCGAACTCAG 420

AAGTGAAACG CCGTAGCGCC GATGGTAGTG TGGGGTCTCC CCATGCGAGA GTAGGGAAC 480

GCCAGGCATC AAATTAAGCA GTAAACTGAT GTAAAAATCA GTGGTTGTAA AAGAATTCGG 540

TGGAGCGGTA GTTCAGTTGG TTAGAATACC TGCCTGTCAC GCAGGGGGTC GCGGGTTCGA 600

GTCCCGTCCG TTCCGCCACT TATTAAGAGC CCTGAGCATT AGCTCAGGGC TTTTCTTTG 660

CCTGTCATTT AATTATTGCT CAATTCGCAA AAATCCTCTG CATTCTCGC TCTTTTCTG 720

CAAAGCGCTG AAGGTCATAA TCCCCTCAGT TAACGAACAT AGTGATTAAT AAGAGGAATT 780

CTATGACTAT CCCTGCATTC GGTTTAGGTA CTTTTCGCCT GAAAGACGAC GTGGTTATCG 840

CTTCTGTGAA AACGGCGCTT GAACTGGGCT ACCGTGCTGT CGACTGCG CAAATCTATG 900

ATAATGAAGC GGCTGTTGGA CAGGCGATTG CTGAGAGCGG CGTACCACGT AGCGAGCTGT 960

ACATCACCAC CAAGGTCTGG ATTGAAAACC TTAGCAAAGA CAAGCTAATC CCAAGCCTGA 1020

AAGAGAGCCT GAAAACTGC GTACCGATTA TGTCGATCTG ACGCTGATCC ACTGGCCATC 1080

TCCGGGTGAT GCCGTGTCTG TCGAAAAATT ATGCAGGCAT TGCTGGAAGC TAAAAACAAG 1140

GGCTGACTCG CGAAATGGCA TCT 1163

>(130)X Hadar\_Anatum\_Nchanga\_CP038595\_CP074323\_CP082370

TCGGTACGCA GTTTTTTCAG GCTCTCTTC AGGCTTGGGA TTAGCTTGTC TTTGCTAAGG 60

TTTTCAATCC AGATCTTGGT GGTGATGTAC AGCTCATTAC GCGGTACGCC GCTCTCAGCA 120

ATCGCCTGTC CAACAGCCGC TTCATTATCA TAGATTTGCG CAGTGTCGAC AGCACGGTAG 180

CCCAGTTCAA GCGCCGTTTT AACAGAAGCG ATAACCACGT CGTCTTTCAG GCGAAAAGTA 240

CCTAAACCGA ATGCAGGGAT AATCATAGAA TTCCTCTTTT TAATCACTAT GTTCGTTAAC 300

TGAGGGGATT ATGACCTTCA GCGCTTTGCA GAAAAAGAGC GAGAAATGCA GAGGATTTTT 360

GCTAATTGAG CAATAATTA ATGACATGCA AAGAAAAAGC CCTGAGCTAA TGCTCAGGGC 420

TCTTAATAAG TGGCGGAACG GACGGGACTC GAACCCGCGA CCCCTGCGT GACAGGCAGG 480

TATTCTAACC AACTGAACTA CCGCTCCACC GAATTTCTTT GTCACAACCC GGATTTTCAT 540

CCCGGTTTAC TGCAATTTGA TGCCTGGCAG TTTATGAATC ACTTCGTGAT TCACCTTCT 600

GGCCGTTGCT TCGCAACGTT CAAAAGCTTT CGCTTTTGTC CTA CTCTCTG TCGAGTAGTG 660

AACTGCCCCG AAAGTTAATG CCATACTTCT AATTTGATGC CTGGCAGTTC CCTACTCTCG 720

CATGGGGAGA CCCCACTA CCATCGGCGC TACGGCGTTT CACTTCTGAG TTCGGCATGG 780

GGTCAGGTGG GACCACCGCG CTAGTGCCGC CAGGCAAATT CTTTGTGCTC CGTCCTGTGT 840

CTTTTACT GATACGGCGT TGGCTGCTCT TGCGAGCGTC AGTCACATAC TTCTGTATGC 900

TCCTCCGTC GCTGCGTTTG CCGCCTTGTC TCAGCGTAAA ATCCTTCGGA CTCTGAATCT 960

GAGCTGAAAA TTGTTGTCTT CTCAATCCGC CAAAACATCT TCGGCGTTGT AAGGTTAAGC 1020

CTCACGGTTC ATTAGTACCG GTTAGCTCAA CGCATCGCTG CGCTTACACA CCCGGCCTAT 1080

CAACGTCGTC GTCTTCAACG TTCCTCAGG AACTCTAAG TCTCAGGGAG AACTCATCTC 1140

GGGGCAAGTT TCGTGCTTAG ATGCTTTCAG CACTTATCTC TTCCGCATTT AGCTACCGGG 1200

CAGTGCCATT GGCATGACAA CCCGAACACC AGTGATGCGT CCACTCCGGT CCTCTCGTAC 1260

TAGGAGCAGC CCCCTCAGT TCTCCAGCGC CCACGGCAGA TAGGGACCGA ACTGTCTCAC 1320

GACGTTCTAA ACCCAGCTCG CGTACCACTT TAAATGGCGA ACAGCCATAC CCTTGGGACC 1380

TACTTCAGCC CCAGGATGTG ATGAGCCGAC ATCGAGGTGC CAAACACCGC CGTCGATATG 1440

AACTCTTGGG CGGTATCAGC CTGTTATCCC CGGAGTACCT TTTATCCGTT GAGCGATG 1498

>(131)C Heidelberg\_Crossness\_IG-4,[5],12:i:-\_NC\_021812\_CP019408\_CP082588

ATGTTTTGGC GGATTGAGAA GACAACAATT TTCAGCTCAG ATTCAGAGTC CGAAGGATTT 60

TACGCTGAGA CAAGGCGGCA AACGCAGCGA CGGAAGGAGC ATACAGAAGT ATGTGACTGA 120

CGCCCGCAAG AGCAGCCAAC GCCGTATCAG TGTAAGGAC ACAGGACAGA GCACAAAGAA 180

TTTGCCTGGC GGCAGTAGCG CGGTGGTCCC ACCTGACCCC ATGCCGAAGT CAGAAGTGAA 240

ACGCCGTAGC GCCGATGGTA GTGTGGGGTC TCCCATGCG AGAGTAGGGA ACTGCCAGGC 300

ATCAAATTAG AAGTATGGCA TTAACCTTCG GGGCAGTTCA CTAICTGACA GAGAGTAGGA 360

CAAAAGCGAA AGCTTTTGAA CGTTGCGAAG CAACGGCCCG AAGGGTGAAT CACGAAGTGA 420

TTCATAAACT GCCAGGCATC AAATTGCAGT AAACCGGGAT GAAAATCCGG GTTGTGACAA 480

AGAAATTCGG TGGAGCGG

498

>(132)C Infantis\_CP019202

ATGTTTTGGC GGTGAGAAG ACGATTTTCA GCACTGATTC AGAGTTGAGT ACGCAATAAT 60

TTGCGCAGCA GCAAGGCGGC AAGCGAAGGA AAGGAAGGAG CATAACAGAAG TATGTGACTG 120

AGTTTACGAG CGCAGGCAAC GCCGCTGATG CGATAAAGAA TTGCGTACAG AGCATAAAAG 180

AATTTGCCTG GCGGCACTAG CGCGGTGGTC CCACCTGACC CCATGCCGAA CTCAGAAGTG 240

AAACGCCGTA GCGCCGATGG TAGTGTGGGG TCTCCCATG CGAGAGTAGG GAACTGCCAG 300

GCATCAAATT AGAAGTATGG CATTAACTTT CGGGGCAGTT CACTACTCGA CAGAGAGTAG 360

GACAAAAGCG AAAGCTTTTG AACGTTGCGA AGCAACGGCC CGAAGGGGGA ATCACGAAGT 420

GATTCATAAG CTGCCAGGCA TCAAATTGCA GTAAACCGGG ATGAAAATCC GGATTGTGAC 480

AAAGAAATTC GGTGGAGCGG 500

>(133)C Javiana\_NC\_020307

ATGTTTTGGC GGAAGTACGAA GACGAACAAT TTTCAGCTTT GATTCAGAGT TGAGTACGCA 60

ATAATTTGCG CAGCAGCAAG GCGGCAAGCG AAGGAAAGGA AGGAGCATAC AGAAGTATGT 120

GACTGACTTT ACGAGCGCAG GCAACGCCGC TGATGCGATA AAGAATTGCG TACTGAGCAT 180

AAAAGAATTT GCCTGGCGGC ACTAGCGCGG TGGTCCCACC TGACCCCATG CCGAACTCAG 240

AAGTGAAACG CCGTAGCGCC GATGGTAGTG TGGGGTCTCC CCATGCGAGA GTAGGGAACT 300

GCCAGGCATC AAATTAAGCA GTAAGCCGGT CATAAACCGG TGGTTGTAAA AGAATCCGGT 360

GGAGCGG

367

>(134)C Johannesburg\_CP019411

ATGTTTTGGC GGTGAGAGA TGATTTTCAG CACTGATTCA GATTACATCA GAACGTAAAA 60

ACGGTCTGAT AACAGAATTT GCCTGGCGGC ACTAGCGCGG TGGTCCCACC TGACCCCATG 120

CCGAACTCAG AAGTGAAACG CCGTAGCGCC GATGGTAGTG TGGGGTCTCC CCATGCGAGA 180

GTAGGGA ACT GCCAGGCATC AAATTGCAGT AAACCGGGAT GAAAATCCGG GTTGTGACAA 240

AGAAATTCGG TGGAGCGG

258

>(135)C Kentucky\_CP022500

ATGTTTTGGC GTTGAGAGAC GATTTTCAGC ACTGATTGAG AGTCCGAAGG ATTTTACGCT 60

GAGACAAGGC GGCAAACGCA GCGACGGAAG GAGCATAACAG AAGTATGTGA CTGACGCTCG 120

CAAGAGCAGC CAACGCCGTA TCAGTGTAAG AGACACAGGA CAGAGCACAA AGAATTTGCC 180

TGGCGGCACT AGCGCGGTGG TCCCACCTGA CCCCATGCCG AACTCAGAAG TGAAACGCCG 240

TAGCGCCGAT GGTAGTGTGG GGTCTCCCA TGCGAGAGTA GGGAAGTCC AGGCATCAAA 300



TTAGAAGTAT GGCATTAACT TTCGGGGCAG TTCACTACTC GACAGAGAGT AGGACAAAAG 360

CGAAAGCTTT TGAACGTTGC GAAGCAACGG CCCGAAGGGT GAATCACGAA GTGATTCATA 420

AACTGCCAGG CATCAAATTG CAGTAAACCG GGATGAAAAT CCGGATTGTG ACAAAGAAAT 480

TCGGTGGAGC GG 492

>(136)X Newport\_Derby\_NC\_021902\_CP075036

CTTGCCCCGA GATGAGTTCT CCCTGAGACT TAGAGTCTCC TGAAGGAACG TTGAAGACGA 60

CGACGTTGAT AGGCCGGGTG TGTAAGCGCA GCGATGCGTT GAGCTAACCG GTACTAATGA 120

ACCGTGAGGC TTAACCTTAC AACGCCGAAG ATGTTTTGGC GGATGAGAGA CGATTTTCAG 180

CACTGATTCC GGATTTTCGG GAACGAAAGA TTTTACGCTG AGGCAAGGCG GCAAATGAAG 240

GAAAGGAAGG AGCATACAGA AGTATGTGAC TGACTTTGCG AATGCAGCCA ACGCAGCATC 300

GGTGTA AAAAG ATTCGTTTCC GGTAACAGAA TTTGCCTGGC GGCCTAGCG CGGTGGTCCC 360

ACCTGACCCC ATGCCGA ACT CAGAAGTGAA ACGCCGTAGC GCCGATGGTA GTGTGGGGTC 420

TCCCCATGCG AGAGTAGGGA ACTGCCAGGC ATCAAATTAG AAGTATGGCA TTAAC TTTCG 480

GGGCAGTTCA CTA CTGACA GAGAGTAGGA CAAAAGCGAA AGCTTTTGAA CGTTGCGAAG 540

CAACGGCCCCG AAGGGTGAAT CACGAAGTGA TTCATAA ACT GCCAGGCATC AAATTAAGCA 600

GTAAACTGAT GTAAAAATCA GTGGTTGTAA AAGAATTCGG TGGAGCGGTA GTTCAGTTGG 660

TTAGAATACC TGCCTGTCAC GCAGGGGGTC GCGGGTTCGA GTCCCGTCCG TTCCGCCACT 720

TATTAAGAGC CCTGAGCATT AGCTCAGGGC TTTTCTTTG CCTGCGATTT AATTATTGCT 780

CAATTCGCAA AAATCCTCTG CATTCTCGC TCTTTTCTA CGAAGCGCTG AAGGTCATAA 840

TCCCCTCAGT TAACGAACAT AGTGATTAGA AAGAGGAATT CTATGACTAT CCCTGCATTC 900

GGTTTAGGTA CTTGTCGCCT GACAGACGAC GTGGTTATCG CTTCTGTGAA AACGGCGCTT 960

GAACTGAGCT ACCGTGCTGT CGA 983

>(137)C Newport\_NoNCBI match

ATGTTTTGGC GGATGAGAGA CGATTTTCAG CTCAGATTCA GAGTCCGAAG GATTTTACGC 60

TGAGACAAGG CGGCAAACGC AGCGACGGAA GGAGCATACA GAAGTATGTG ACTGACGCTC 120

GCAAGAGCAG CCAACGCCGT ATCAGTGTA AAGATTCGGT ACAGAGCACA AAGAATTTGC 180

CTGGCGGCAC TAGCGCGGTG GTCCACCTG ACCCCATGCC GAACTCAGAA GTGAAACGCC 240

GTAGCGCCGA TGGTAGTGTG GGGTCTCCCC ATGCGAGAGT AGGGAAGTGC CAGGCATCAA 300

ATTAGAAGTA TGGCATTAACT TTTTCGGGGCA GTTCACTACT CGACAGAGAG TAGGACAAAA 360

GCGAAAGCTT TTGAACGTTG CGAAGCAACG GCCCGAAGGG TGAATCACGA AGTGATTCAT 420

AAACTGCCAG GCATCAAATT AAGCAGTAAA CTGATGTAAA AATCAGTGGT TGTAAGAA 480

TTCGGTGGAG CGG

493

>(138)C Paratyphi-A\_NC\_006511

ATGTTTTGGC GGATGAGAGA CGATTTTCAG CACTGATTCC GGATTTTCGG GAACGAAAGA 60

TTTTACGCTG AGGCAAGGCG GCAAATGAAG GAAAGGAAGA AGCATACAGA AGTATGTGAC 120

TGACTTTACG AATGCAGCCA ACGCAGCATC GGTGTAAAAG ATTCGTTTCT GGCAACAGAA 180

TTTGCCTGGC GGCAGTAGCG CGGTGGTCCC ACCTGACCCC ATGCCGAACT CAGAAGTGAA 240

ACGCCGTAGC GCCGATGGTA GTGTGGGGTC TCCCCATGCG AGAGTAGGGA ACTGCCAGGC 300

ATCAAATTAG AAGTATGGCA TTAAC TTTCG GGGCAGTTCA CTA CTGACA GAGAGTAGGA 360

CAAAGCGAA AGCTTTTGAA CGTTGCGAAG CAACGGCCCG AAGGGTGAAT CACGAAGTGA 420

TTCATAAACT GCCAGGCATC AAATTAAGCA GTAAACTGAT GTAAAAATCA GTGGTTGTAA 480

AAGAATTCGG TGGAGCGG

498

>(139)X Javiana\_CP085052

AAGAGATAAG TGCTGAAAGC ATCTAAGCAC GAAACTTGCC CCGAGATGAG TTCTCCCTGA 60

GACTTTAGGT CTCCTGAAGG AACGTTGAAG ACGACGACGT TGATAGGCCG GGTGTGTAAG 120

CGCAGCGATG CGTTGAGCTA ACCGGTACTA ATGAACCGTG AGGCTTAACC TTACAACGCC 180

GAAGATGTTT TGGCGGATGA GAGACGATTT TCAGCACTGA TTCAGAGTTG AGTACGCAAT 240

AATTTGCGCA GCAGCAAGGC GGCAAGCGAA GGAAAGGAAG GAGCATACAG AAGTATGTGA 300

CTGAGTTTAC GAGCGCAGGC AACGCCGCTG ATGCGATAAA GAATTGCGTA CAGAGCACAA 360

AGAATTTGCC TGGCGGCACT AGCGCGGTGG TCCCACCTGA CCCCATGCCG AACTCAGAAG 420

TGAAACGCCG TAGCGCCGAT GGTAGTGTGG GGTCTCCCA TCGGAGAGTA GGGAAGTCC 480

AGGCATCAAA TTAGAAGTAT GGCATTAAC TCGGGGCAG TTCACTACTC GACAGAGAGT 540

AGGACAAAAG CGAAAGCTTT TGAACGTTGC GAAGCAACGG CCCGAAGGGT GAATCACGAA 600

GTGATTCATA AACTGCCAGG CATCAAATTG CAGTAAACCG GGATGAAAAT CCGGGTTGTG 660

ACAAAGAAAT TCGGTGGAGC GGTAGTTCAG TTGGTTAGAA TACCTGCCTG TCACGCAGGG 720

GGTCGCGGGT TCGAGTCCCG TCCGTTCCGC CACTTATTAA GAGCCCTGAG CATTAGCTCA 780

GGGCTTTTTT TTTTCTGTC ATTTAATTAT TGCTCAATTC GCAAAAATCC TCTGCATTTT 840

TCGCTCTTTT TCTGCAAAGC GCTGAAGGTC ATAATTCCT CAGTTAACGA ACATAGTGAT 900

TAAAAAGAGG AATTCTATGA CTATCCCTGC ATTCGGTTTA GGTACTTTTC GCCTGAAAGA 960

CGACGTGGTT ATCGCTTCTG TTAAAACGGC GCTTGAAGCTG GGCTACCGTG CTGTGACAC 1020

TGCGCAAATC TATGATAATG AAGCGGCTGT TGGACAGGCG ATTGCTGAGA GCGGCGTACC 1080

GCGTAGCGAG CTGTACATCA CCACCAAGAT CTGGATTGAA AACCTTAGCA AAGACAAGCT 1140

AATCCCAAGC CTGAAAGAGA GCCTGAAAAA CTGCGTACCG ATTATGTCGA TCTGACGCTG 1200

ATCCCTGGCC ATCTCCGGGT GATGCCGGTC TGCAAGAAT T 1241

>(140)C Paratyphi-C\_NC\_012125

ATGTTTTGGC GGATGAGAGA CGATTTTCAG CTCAGATTCA GATTACATCA GAACGTAAAA 60

ACGGTCTGAT AACAGAATTT GCCTGGTGGC ACTAGCGCGG TGGTCCCACC TGACCCCATG 120

CCGAACTCAG AAGTGAAACG CCGTAGCGCC GATGGTAGTG TGGGGTCTCC CCATGCGAGA 180

GTAGGGAECT GCCAGGCATC AAATTAGAAG TATGGTATTA ACTTTGAGG CAGTTCACTA 240

CTCGACAGAG AGTAGGACAA AAGCGAAAGC TTTTGAACGT TGCGAAGCAA CGGCCGAAG 300

GGTGAATCAC GAAGTGATTC ATAACTGCC AGGCATCAAA TTGCAGTAAA CCGGGATGAA 360

AATCCGGATT GTGACAAAGA AATTCGGTGG AGCGG 395

>(141)C Saintpaul\_Stanleyville\_CP019206\_CP017723

ATGTTTTGGC GGATTGAGAA GACAACAATT TTCAGCTCAG ATTCAGAGTC CGAAGGATTT 60

TACGCTGAGA CAAGGCGGCA AACGCAGCGA CGGAAGGAGC ATACAGAAGT ATGTGACTGA 120

CGCTCGCAAG AGCAGCCAAC GCCGTATCAG TGTA AAAAGAC ACAGGACGGA GCACAAAGAA 180

TTGCTGGC GGCCTAGCG CGGTGGTCCC ACCTGACCCC ATGCCGA ACT CAGAAGTGAA 240

ACGCCGTAGC GCCGATGGTA GTGTGGGGTC TCCCATGCG AGAGTAGGGA ACTGCCAGGC 300

ATCAAATTAG AAGTATGGCA TTAAC TTTTCG GGGCAGTTCA C TACTCGACA GAGAGTAGGA 360

CAAAAGCGAA AGCTTTTGAA CGTTGCGAAG CAACGGCCCG AAGGGTGAAT CACGAAGTGA 420

TTCATAAACT GCCAGGCATC AGATTAAGCA GTAAACTGAT GTAAAAATCA GTGGTTGTAA 480

AAGAATTCGG TGGAGCGG

498

>(142)C Schwarzengrund\_NC\_011094

ATGTTTTGGC G GACTGAGAG ACGATTTTCA GCACTGATTC CGGATTTTCG GGAACGAAAG 60

ATAAAAGATT CGTTTCCGGC AACAGAATTT GCCTGGCGGC ACTAGCGCGG TGGTCCCACC 120

TGACCCCATG CCGAACTCAG AAGTGAAACG CCGTAGCGCC GATGGTAGTG TGGGGTCTCC 180

CCATGCGAGA GTAGGGA ACT GCCAGGCATC AAATTAAGCA GTAAGCCGGT CATAAACCGG 240

TGGTTGTAAA AGAATCCGGT GGAGCGG

267

>(143)C Stanley\_LS483434

ATGTTTTGGC GGATTGAGAA GACAACAATT TTCAGCTCAG ATTCAGAGTC CGAAGGATTT 60

TACGCTGAGA CAAGGCGGCA AACGCAGCGA CGGAAGGAGT ATACAGAAGT ATGTGACTGA 120

CGCTCGCAAG AGCAGCCAAC GCCGTATCAG TGTAAGAC ACAGGACAGA GCACAAAGAA 180

TTGCTGGC GGCCTAGCG CGGTGGTCCC ACCTGACCCC ATGCCGAAGT CAGAAGTGAA 240

ACGCCGTAGC GCCGATGGTA GTGTGGGGTC TCCCATGCG AGAGTAGGGA ACTGCCAGGC 300

ATCAAATTAG AAGTATGGCA TTAACITTCG GGGCAGTTCA CACTCGACA GAGAGTAGGA 360

CAAAGCGAA AGCTTTTGAA CGTTGCGAAG CAACGGCCCG AAGGGTGAAT CACGAAGTGA 420

TTCATAAACT GCCAGGCATC AAATTGCAGT AAACCGGGAT GAAAATCCGG GTTGTGACAA 480

AGAAATTCGG TGGAGCGG

498

>(144)C Thompson\_NC\_022525

ATGTTTTGGC GGATGAGAGA CGATTTTCAG CACTGATTCA GATTACATCA GAACGTAAAA 60

ACGGTCTGAT AACAGAATTT GCCTGGCGGC CGTAGCGCGG TGGTCCCACC TGACCCCATG 120

CCGAATCAG AAGTGAACG CCGTAGCGCC GATGGTAGTG TGGGGTCTCC CCATGCGAGA 180

GTAGGGA ACT GCCAGGCATC AATTTAAGCA GTAAACTGAT GTAAAAATCA GTGATTGTAA 240

AAGAATTCGG TGGAGCGG

258

>(145)C Typhi\_NC\_003198

ATGTTTTGGC GGATGAGAGA CGATTTTCAG CACTGATTCC GGATTTTCGG GAACGAAAGA 60

TAAAAGATTC GTTTCCGGCA ACAGAATTTG CCTGGCGGCA CTAGCGCGGT GGTCCACCT 120

GACCCCATGC CGAACTCAGA AGTGAAACGC CGTAGCGCCG ATGGTAGTGT GGGGTCTCCC 180

CATGCGAGAG TAGGGA ACTG CCAGGCATCA AATTAAGCAG TAAATTGATG TAAAAATCAG 240

TGGTTGTAAA AGAATTCGGT GGAGCGG

267

>(146)C Typhimurium-DT2\_NC\_022544

ATGTTTTGGC GGTTAAGAGA AGATTTTCAG CACTGATTCA GAGTTGAGTA CGCAATAATT 60

TGCGCAGCAG CGAGGCGGCA AGCGAAGGAA AGGAAGGAGC ATACAGAAGT ATGTGACTGA 120

CTTTACGAGC GCAGGCAACG CCGCTGATGC GATAAAGAAT TCGGTACAGA GCACAAAGAA 180

TTTGCTGGC GGC ACTAGCG CGGTGGTCCC ACCTGACCCC ATGCCGA ACT CAGAAGTGAA 240

ACGCCGTAGC GCCGATGGTA GTGTGGGGTC TCCCATGCG AGAGTAGGGA ACTGCCAGGC 300



ATCAAATTAG AAGTATGGCA TTAACITTCG GGGCAGTTCA CTAICTCGACA GAGAGTAGGA 360

CAAAAGCGAA AGCTITTTGAA CGTTGCGAAG CAACGGCCCG AAGGGTGAAT CACGAAGTGA 420

TTCATAAACT GCCAGGCATC AAATTAAGCA GTAAACTGAT GTAAAAATCA GTGGTTGTAA 480

AAGAATTCGG TGGAGCGG

498

>(147)X Typhimurium\_Enteritidis\_Albert\_Hissar\_NC\_003917\_CP044188\_CP018657\_CP088138

GAAGAGATAA GTGCTGAAAG CATCTAAGCA CGAAACTTGC CCCGAGATGA GTTCTCCCTG 60

AGACTTAGAG TCTCCTGAAG GAACGTTGAA GACGACGACG TTGATAGGCC GGGTGTGTAA 120

GCGCAGCGAT GCGTTGAGCT AACCGTACT AATGAACCGT GAGGCTTAAC CTTACAACGC 180

CGAAGATGTT TTGGCGGATT GAGAAGACAA CAITTTTCAG CTCAGATTCA GAGTCCGAAG 240

GATTTTACGC TGAGACAAGG CGGCAAACGC AGCGACGGAA GGAGCATACA GAAGTATGTG 300

ACTGACGCTC GCAAGAGCAG CCAACGCCGT ATCAGTGTA AAGACACAGG ACGGAGCACA 360

AAGAATTTGC CTGGCGGCAC TAGCGCGGTG GTCCACCTG ACCCATGCC GAACTCAGAA 420

GTGAAACGCC GTAGCGCCGA TGGTAGTGTG GGGTCTCCCC ATGCGAGAGT AGGGAAGTGC 480

CAGGCATCAA ATTAGAAGTA TGGCATTAA TTTCCGGGGCA GTTCACTACT CGACAGAGAG 540

TAGGACAAAA GCGAAAGCTT TTGAACGTTG CGAAGCAACG GCCCGAAGGG TGAATCACGA 600

AGTGATTCAT AAAGTCCAG GCATCAAATT AAGCAGTAAA CTGATGTAAA AATCAGTGGT 660

TGTAAAAGAA TTCGGTGGAG CGGTAGTTCA GTTGGTTAGA ATACCTGCCT GTCACGCAGG 720

GGGTCGCGGG TTCGAGTCCC GTCCGTTCCG CCACTTATTA AGAGCCCTGA GCATTAGCTC 780

AGGGCTTTTT CTTTCCATGT CATTTAATTA TTGCTCAATT CGCAAAAATC CTCTGCATTT 840

CTCGCTCTTT TTCTGCAAAG CGCTGAAGGT CATAATCCCC TCAGTTAACG AACATAGTGA 900

TTAAAAGAG GAATTCTATG ACTATCCCTG CATTGCGTTT AGGTACTTTT CGCCTGAAAG 960

ACGACGTGGT TATCGCTTCT GTTAAAACGG CGCTTGAACT GGGCTACCGT GCTGTGACAA 1020

CTGCGCAAAT CTATTATAAT GAAGCGGCTG TTGGACAGGC GATTGCTGAG AGCGGCGTAC 1080

CGCGTAATGA GCTGTACATC ACCACCAAGA TCTGGATTGA AAACCTTAGC AAAGACAAGC 1140

TAATCCAAG CCTGAAAGAG AGTCTGAAAA ACTGCGTACC GATAATGTCG ATCTGAC 1197

>(148)C Unique\_NoNCBI match

ATGTTTTGGC GGATGAGAGA CGATTTTCAG CAGTGATTCA GAGTTGAGTA CGCAATAATT 60

TGCGCAGCAG CAAGGCGGCA AGCGAAGGAA AGGAAGGAGC ATACAGAAGT ATGTGACTGA 120

GTTTACGAGC GCAGGCAACG CCGCTGATGC GATAAAGAAT TGCGTACAGA GCACAAAGAA 180

TTTGCCTGGC GGCAGTAGCG CGGTGGTCCC ACCTGACCCC ATGCCGAACT CAGAAGTGAA 240

ACGCCGTAGC GCCGATGGTA GTGTGGGGTC TCCCATGCG AGAGTAGGGA ACTGCCAGGC 300

ATCAAATTGC AGTAAACCGG GATGAAAATC CGGGTTGTGA CAAAGAAATT CGGTGGAGCG 360

G 361

>(149)C Unique\_NoNCBI match

ATGTTTTGGC GGTTGAGAAG ACAACAATTT TCAGCTCAGA TTCAGAGTTG AGTACGCAAT 60

AATTTGCGCA GCAGCAAGGC GGCAAGCGAA GGAAAGGAAG GAGCATACAG AAGTATGTGA 120

CTGACTTTAC GAGCGCAGGC AACGCCGCTG ATGCGATAAA GAATTGCGTA CTGAGCATAA 180

AAGAATTTGC TTGGCGGCAC TAGCGCGGTG GTCCACCTG ACCCATGCC GAACTCAGAA 240

GTGAAACGCC GTAGCGCCGA TGGTAGTGTG GGGTCTCCCC ATGCGAGAGT AGGGAAGTGC 300

CAGGCATCAA ATTAAGCAGT AAGCCGGTCA TAAACCGGTG GTTGTAAGAA AATCCGGTGG 360

AGCGG 365

>(150)C Unique\_NoNCBI match

ATGTTTTGGC GGATGAGAGA AAGATTTTCA GCCTGATACA GATTAAATCA GAACGCAGAA 60

CGGGTCTGAT AAAACAGAAT TTGCCTGGCG GCCTTAGCGC GGTGGTCCCA CCTGACCCCA 120

TGCCGAACTC AGAAGTGAAA CGCCGTAGCG CCGATGGTAG TGTGGGGTCT CCCCATGCGA 180

GAGTAGGGAA CTGCCAGGCA TCAAATTACG AAGAATGGCA CTGATCTTTG AGGCAGTTCA 240

CTACTCGATA AGAGAGTAGG ACAAAGCGA AAGCTTTTGA ACGTTGCGAA GCAACGGCCC 300

GAAGGGTGAA TCACGAAGTG ATTCATAAAC TGCCAGGCAT CAAATTAAGC AGTAAGCCGG 360

TCATAAAACC GGTGGTTGTA AAAGAATTCG GTGGAGCGG 399

>(151)C Brandenburg\_NoNCBImatch

ATGTTTTGGC GGATTGAGAG ACGATTTTCA GCACTGATTC CGGATTTTCG GGAACGAAAG 60

ATAAGAGATT CGTTTCCGGC AACAGAATTT GCCTGGCGGC ACTAGCGCGG TGGTCCCACC 120

TGACCCCATG CCGAACTCAG AAGTGAAACG CCGTAGCGCC GATGGTAGTG TGGGGTCTCC 180

CCATGCGAGA GTAGGGAACT GCCAGGCATC AAATTAGAAG TATGGCATTACTTTTCGGGG 240

CAGTTCACTA CTCGACAGAG AGTAGGACAA AAGCGAAAGC TTTTGAACGT TGCGAAGCAA 300

CGGCCCCAAG GGTGAATCAC GAAGTGATTG ATAACTGCC AGGCATCAAA TTAAGCAGTA 360

AGCCGGTCAT AAAGTGGTGG TTGTAAAAAA ATTCGGTGGA GCGG 404

>(152)C Unique\_NoNCBImatch

ATGCTTTGGC GGATTGAGAG ATGATTTTCA GCACTGATTC AGAGTTGAGT ACGCAATAAT 60

TTGCGCAGCA GCAAGGCGGC AAGCGAAGGA AAGGAAGGAG CACACAGAAG TATGTGACTG 120

AGTTTACGAG CGCAGGCAAC GCCGCTGATG CGATAAAGAA TTGCGTACTG AGCATAAAAG 180

AATTTGCCTG GCGGCACTAG CGCGGTGGTC CCACCTGACC CCATGCCGAA CTCAGAAGTG 240

AAACGCCGTA GCGCCGATGG TAGTGTGGGG TCTCCCATG CGAGAGTAGG GAACTGCCAG 300

GCATCAAATT AGAAGTATGG CATTAACTTT CGGGGCAGTT CACTACTCGA CAGAGAGTAG 360

GACAAAAGCG AAAGCTTTTG AACGTTGCGA AGCAACGGCC CGAAGGGTGA ATCACGAAGT 420

GATTCATAAA CTGCCAGGCA TCAAATTAAG CAGTAAGCCG GTCATAGACT GGTGGTTGTA 480

AAAGAATTCG GTGGAGCGG

499

>(153)C Unique\_NoNCBI match

ATGTTTTGGC GGATTGAGAA GACAACAATT TTCAGCTCAG ATTCAGAGTC CGAAGGATTT 60

TACGCTGAGA CAAGGCGGCA AACGCAGCGA CGGAAGGAGC ATACAGAAGT ATGTGACTGA 120

CGCCCGCAAG AGCAGCCAAC GCGGTATCAG TGTAAGAGAC ACAGGACAGA GCACAAAGAA 180

TTTGCCTGGC GCGACTAGCG CGGTGGTCCC ACCTGACCCC ATGCCGAAGT CAGAAGTGAA 240

ACGCCGTAGC GCCGATGGTA GTGTGGGGTC TCCCATGCG AGAGTAGGGA ACTGCCAGGC 300

ATCAAATTAG AAGTATGGCA TTAAC TTTCG GGGCAGTTCA C TACTCGACA GAGAGTAGGA 360

CAAAAGCGAA AGCTTTTGAA CGTTGCGAAG CAACGGCCCG AAGGGTGAAT CACGAAGTGA 420

TTCATAAACT GCCAGGCATC AAATTAAGCA GTAAACTGAT GTAAAAATCA GTGGTTGTAA 480

AAGAATTCGG TGGAGCGG 498

>(154)C Unique\_NoNCBI match

ATGTTTTGGG GGGCTGAGAA GGAGAGCAAT TTTCAGTTTT GATTCAGAGT TGAGTAGGCA 60

ATAATTTGTG CAGCAGCAAG GGGGCAAGCG AAGGAAAGGA AGGAGCATT CAGAAGTATGT 120

GAGTGGCTTT ACGAGCGCAG GCAACCCCGT TGATGTGATA AAGAATTGGG TGGTGAGCAT 180

AAAAGAATTT CCCGGGGGGC GCTAGCCCGG GGGTCCCCC GGCCCCATC CGGAATTCAG 240

AAGGAAACC CGGTAGCCCC GAGGGTAGGG GGGGTTTTCC CCATGGGAGA GTAGGGA ACT 300

CCCAGCCATC AAATTCAGCA GTAAGCCGGT CATATACCGG TGGTTG TAAA AGAATTCGGT 360

GGAGCGG 367

>(155)C Unique\_NoNCBI match

ATGTTTTGGC GGTTGAGAAG ACGATTTTCA GCACTGATTC AGAGTTGAGT ACGCAATAAT 60

TTGCGCAGCA GCAAGGCGGC AAGCGAAGGA AAGGAAGGAG CATAACAGAAG TATGTGACTG 120

AGTTTACGAG CGCAGGCAAC GCCGCTGATG CGATAAAGAA TTGCGTACAG AGCATAAAAG 180

AAATTTGCTG GCGGCACTAG CGCGGTGGTC CCACCTGACC CCATGCCGAA CTCAGAAGTG 240

AAACGCCGTA GCGCCGATGG TAGTGTGGGG TCTCCCATG CGAGAGTAGG GAACTGCCAG 300

GCATCAAATT AGAAGTATGG CATTAACTTT CGGGGCAGTT CACTACTCGA CAGAGAGTAG 360

GACAAAAGCG AAAGCTTTTG AACGTTGCGA AGCAACGGCC CGAAGGGGGA ATCCCGAAGT 420

GATTCATAAG CTGCCAGGCA TCAAATTGCA GTAAACCGGG ATGAAAATCC GGATTGTGAC 480

AAAGAAATTC GGTGGAGCGG 500

>(156)C Unique\_NoNCBI match

ATGTTTTGGC GGTTGAGAAG ACAACAATTT TCAGCACTGA TTCAGAGTTG AGTACGCAAT 60

AAATTTGCGCA GCAGCAAGGC GGCAAGCGAA GGAAAGGAAG GAGCATAACAG AAGTATGTGA 120

CTGACTTTGC GAGCGCAGGC AACGCCGCTG ATGCGATAAA GAATTGCGTA CTGAGCATAA 180

AAGAATTTGC CTGGCGGCAG TAGCGCGGTG GTCCACCTG ACCCATGCC GAACTCAGAA 240

GTGAAACGCC GTAGCGCCGA TGGTAGTGTG GGGTCTCCCC ATGCGAGAGT AGGGAAGTGC 300

CAGGCATCAA ATTAAGCAGT AAGCCGGTCA TAAACCGGTG GTTGTAAGAA AATTCGGTGG 360

AGCGG

365

>(157)C Unique\_NoNCBImatch

ATGTTTTGGC GGATTGAGAA GACAACAATT TTCAGCTCAG ATTCAGAGTC CGAAGGATTT 60

TACGCTGAGA CAAGGCGGCA AACGCAGCGA CGGGAGGAGC ATACAGAAGT ATGTGACTGA 120

CGCCCGCAAG AGCAGCCAAC GCCGTATCAG TGTAAGGAC ACAGGACAGA GCACAAAGAA 180

TTTGCTGGC GGCAGTAGCG CGGTGGTCCC ACCTGACCCC ATGCCGAACT CAGAAGTGAA 240

ACGCCGTAGC GCCGATGGTA GTGTGGGGTC TCCCCATGCG AGAGTAGGGA ACTGCCAGGC 300

ATCAAATTAG AAGTATGGCA TTAACITTCG GGGCAGTTCA CTAICTGACA GAGAGTAGGA 360

CAAAAGCGAA AGCTTTTGAA CGTTGCGAAG CAACGGCCCC AAGGGTGAAT CACGAAGTGA 420

TTCATAAACT GCCAGGCATC AAATTGCAGT AAACCGGGAT GAAAATCCGG GTTGTGACAA 480

AGAAATTCGG TGGAGCGG

498

>(158)C Enteritidis\_CP075019

ATGTTTTGGC GGATGAGAGA CGATTTTCAG CAGTGATTCA GAGTTGAGTA CGCAATACTT 60

TGCGCAGCAG CAAGGCGGCA AGCGAAGGAA AGGAAGGAGC ATACAGAAGT ATGTGACTGA 120



GTTTACGAGC GCAGGCAACG CCGCTGATGC GATAAAGAAT TCGGTACAGA GCACAAAGAA 180

TTTGCTGGC GGCAGTAGCG CGGTGGTCCC ACCTGACCCC ATGCCGAAC TACAAGTGAA 240

ACGCCGTAGC GCCGATGGTA GTGTGGGGTC TCCCCATGCG AGAGTAGGGA ACTGCCAGGC 300

ATCAAATTAG AAGTATGGCA TTAACITTCG GGGCAGTTCA CTAICTGACA GAGAGTAGGA 360

CAAAGCGAA AGCTITTTGAA CGTTGCGAAG CAACGGCCCG AAGGGTGAAT CACGAAGTGA 420

TTCATAAACT GCCAGGCATC AAATTGCAGT AAACCGGGAT GAAAATCCGG GTTGTGACAA 480

AGAAATTCGG TGGAGCGG

498

>(159)C Unique\_NoNCBImatch

ATGTTTTGGC GGTGAGAGA CGATITTCAG CACTGATTCA GATTACATCA GAACGTAAAA 60

ACGGTCTGAT AACAGAATTT GCCTGGCGGC ACTAGCGCGG TGGTCCCACC TGACCCCATG 120

CCGAACCTAG AAGTGAAACG CCGTAGCGCC GATGGTAGTG TGGGGTCTCC CCATGCGAGA 180

GTAGGGAAC TCCAGGCATC AAATTAGAAG TATGGCATTACTTTCTGGGG CAGTTCACTA 240

CTCGACAGAG AGTAGGACAA AAGCGAAAGC TTTTGAACAT TGCGAAGCAA CGGCCCGAAG 300

GGTGAATCAC GAAGTGATTCTATAACTGCC AGGCATCAAA TTAAGCAGTA AACTGATGTA 360

AAAATCAGTG GTTGTAAAAG AATTCGGTGG AGCGG

395

>(160)C Unique\_NoNCBImatch

ATGTTTTGGC GGATTGAGAA GACAACAATT TTCAGCTCAG ATTCAGAGTC CGAAGGATT 60

TACGCTGAGA CAAGGCGGCA AACGCAGCGA CGGAAGGAGC ATACAGAAGT ATGTGACTGA 120

CGCTCGCAAG AGCAGCCAAC GCCGTATCAG TGTAAGAC ACAGGACGGA GCACAAAGAA 180

TTCGCCTGGC GGCCTAGCG CGGTGGTCCC ACCTGACCCC ATGCCGAAGT CAGAAGTGAA 240

ACGCCGTAGC GCCGATGGTA GTGTGGGGTC TCCCATGCG AGAGTAGGGA ACTGCCAGGC 300

ATCAAATTAG AAGTATGGCA TTAACCTTCG GGGCAGTTCA CTAAGTACGACA GAGAGTAGGA 360

CAAAAGCGAA AGCTTTTGAA CGTTGCGAAG CAACGGCCCG AAGGGTGAAT CACGAAGTGA 420

TTCATAAACT GCCAGGCATC AAATTAAGCA GTAACTGAT GTAAAAATCA GTGGTTGTAA 480

AAGAATTCGG TGGAGCGG

498

>(161)C Enteritidis\_CP009091

ATGTTTTGGC GGATGAGAAG ACGATTTTCA GCAGTGATTC AGAGTTGAGT ACGCAATACT 60

TTGCGCAGCA GCAAGGCGGC AAGCGAAGGA AAGGAAGGAG CATAAGAAAG TATGTGACTG 120

AGTTTACGAG CGCAGGCAAC GCCGCTGATG CGATAAAGAA TTGCGTACAG AGCACAAAGA 180

ATTTGCCTGG CGGCAGTAGC GCGGTGGTCC CACCTGACCC CATGCCGAAC TCAGAAGTGA 240

AACGCCGTAG CGCCGATGGT AGTGTGGGGT CTCCCCATGC GAGAGTAGGG AACTGCCAGG 300

CATCAAATTA GAAGTATGGC ATTAAC TTTC GGGGCAGTTC ACTACTCGAC AGAGAGTAGG 360

ACAAAAGCGA AAGCTTTTGA ACGTTGCGAA GCAACGGCCC GAAGGGTGAA TCACGAAGTG 420

ATTCATAAAC TGCCAGGCAT CAAATTGCAG TAAACCGGGA TGAAAATCCG GGTTGTGACA 480

AAGAAATTCG GTGGAGCGG 499

>(162)C Infantis\_NoNCBImatch

ATGTTTTGGC GGATGAGAGA CGATTTTCAG CACTGATTCA GAGTTGAGTA CGCAATAATT 60

TGCGCAGCGG CAAGCGAAGG AAAGGAAGGA GCATACAGAA GTATGTGACT GAGTTTACGA 120

GCGCAGGCAA CGCCGCTGAT GCGATAAAGA ATTGCGTACA GAGCACAAAG AATTTGCCTG 180

GCGGCACTAG CGCGGTGGTC CCACCTGACC CCATGCCGAA CTCAGAAGTG AAACGCCGTA 240

GCGCCGATGG TAGTGTGGGG TCTCCCCATG CGAGAGTAGG GAACTGCCAG GCATCAAATT 300

GCAGTAAACC GGGATGAAAA TCCGGGTTGT GACAAAGAAA TTCGGTGGAG CGG 353

>(163)C Stanley\_CP036167

ATGTTTTGGC GGTTGAGAGA AGATTTTCAG CACTGATTCA GAGTCCGAAG GATTTTACGC 60

TGAGACAAGG CGGCAAACGC AGCGACGGAA GGAGCATACA GAAGTATGTG ACTGACGCTC 120

GCAAGAGCAG CCAACGCCGT ATCAGTGTA AAGACACAGG ACAGAGCACA AAGAATTTGC 180

CTGGCGGCAC TAGCGCGGTG GTCCACCTG ACCCATGCC GAACTCAGAA GTGAAACGCC 240

GTAGCGCCGA TGGTAGTGTG GGGTCTCCCC ATGCGAGAGT AGGGAAGTGC CAGGCATCAA 300

ATTAGAAGTA TGGCATTAA TTTGCGGGCA GTTCACTACT CGACAGAGAG TAGGACAAAA 360

GCGAAAGCTT TTGAACGTTG CGAAGCAACG GCCCGAAGGG TGAATCACGA AGTGATTCAT 420

AAACTGCCAG GCATCAATTT AAGCAGTAAA CTGATGTAAA AATCAGTGAT TGTA AAAAGAA 480

TTCGGTGGAG CGG

493

>(164)C Give\_NoNCBI match

ATGTTTTGGC GGTTGAGAGA CGATTTTCAG CACTGATTCA GAGTTGAGTA CGCAATAATT 60

TGCGCAGCAG CAAGGCGGCA AGCGAAGGAA AGGAAGGAGC ATACAGAAGT ATGTGACTGA 120

CTTTACGAGC GCAGGCAACG CCGCTGATGC GATAAAGAAT TCGGTACAGA GCACAAAGAA 180

TTTGCTGGC GGCCTAGCG CGGTGGTCCC ACCTGACCCC ATGCCGAAGT CAGAAGTGAA 240

ACGCCGTAGC GCCGATGGTA GTGTGGGGTC TCCCCATGCG AGAGTAGGGA ACTGCCAGGC 300

ATCAAATTAA GCAGTAAGCC GGTCATAAAC CGGTGGTTGT AAAAGAATCC GGTGGAGCGG 360

>(165)C Hartford\_CP074660

ATGTTTTGGC GGTTGAGAGA CGATTTTCAG CACTGATTCA GAGTTGAGTA CGCAATAATT 60

TGCGCAGCAG CAAGGCGGCA AGCGAAGGAA AGGAAGGAGC ATACAGAAGT ATGTGACTGA 120

GTTTACGAGC GCAGGCAACG CCGCTGATGC GATAAAGAAT TCGGTACAGA GCACAAAGAA 180

TTTGCCTGGC GGCCTAGCG CGGTGGTCCC ACCTGACCCC ATGCCGA ACT CAGAAGTGAA 240

ACGCCGTAGC GCCGATGGTA GTGTGGGGTC TCCCATGCG AGAGTAGGGA ACTGCCAGGC 300

ATCAAATTGC AGTAAACCGG GATGAAAATC CGGGTTGTGA CAAAGAAATT CGGTGGAGCG 360

G 361

>(166)C Ouakam\_NoNCBI match

ATGTTTTGGC GGATTGAGAA GACGATTTTC AGCACTGATT CAGAGTTGAG TACGCAATAA 60

TTTGCGCAGC AGCAAGGCGG CAAGCGAAGG AAAGGAAGGA GCATACAGAA GTATGTGACT 120

GACTTTACGA GCGCAGGCAA CGCCGCTGAT GCGATAAAGA ATTGCGTACT GAGCACAAAG 180

AATTTGCCTG GCGGCCGTAG CGCGGTGGTC CCACCTGACC CCATGCCGAA CTCAGAAGTG 240

AAACGCCGTA GCGCCGATGG TAGTGTGGGG TCTCCCATG CGAGAGTAGG GAACTGCCAG 300

GCATCAAATT GCAGTAAACC GGGATGAAAA TCCGGGTGGT GACAAAGAAA TTCGGTGGAG 360

CGG

363

>(167)C Inverness\_CP019181

CTGTTTTGGC GGATGAGAGA CGATTTTCAG CACTGATTCA GAGTTGAGTA CGCAATAATT 60

TGCGCAGCAG CAAGGCGGCA AGCGAAGAAA AGGAAGGAGC ATACAGAAGT ATGTGACTGA 120

GTTTACGAGC GCAGGCAACG CCGCTGATGC GATAAAGAAT TCGTACAGA GCACAAAGAA 180

TTGCCTGGC GGCCTAGCG CGGTGGTCCC ACCTGACCCC ATGCCGAAGT CAGAAGTGAA 240

ACGCCGTAGC GCCGATGGTA GTGTGGGGTC TCCCCATGCG AGAGTAGGGA ACTGCCAGGC 300

ATCAAATTAG AAGTATGGCA TTAACITTCG GGGCAGTTCA CTAICTGACA GAGAGTAGGA 360

CAAAAGCGAA AGCTTTTGAA CGTTGCGAAG CAACGGCCCC AAGGGTGAAT CACGAAGTGA 420

TTCATAAACT GCCAGGCATC AAATTAAGCA GTAAACTGAT GTAAAAATCA GTGGTTGTAA 480

AAGAATTCGG TGGAGCGG

498

>(168)C Reading\_CP093132

ATGTTTTGGC GGATGAGAAG ACGAACAATT TTCAGCACTG ATTCCGGATT TTCGGGAACG 60

AAAGATAAGA GATTCGTTTC TGGCAACAGA ATTTGCCTGG CGGCACTAGC GCGGTGGTCC 120

CACCTGACCC CATGCCGAAC TCAGAAGTGA AACGCCGTAG CGCCGATGGT AGTGTGGGGT 180

CTCCCCATGC GAGAGTAGGG AACTGCCAGG CATCAAATTA GAAGTATGGC ATTAAC TTTC 240

GGGGCAGTTC ACTACTCGAC AGAGAGTAGG ACAAAGCGA AAGCTTTTGA ACGTTGCGAA 300

GCAACGGCCC GAAGGGTGAA TCACGAAGTG ATTGATAAAC TGCCAGGCAT CAAATTAAGC 360

AGTAAGCCGG TCATAAACTG GTGGTTGTAA AAAAATTCGG TGGAGCGG 408

>(169)X Ganimara\_CP030288

CTTGCCCCGA GATGAGTTCT CCCTGAGACT TTAAGTCTCC TGAAGGAACG TTGAAGACGA 60

CGACGTTGAT AGGCCGGGTG TGTAAGCGCA GCGATGCGTT GAGCTAACCG G TACTAATGA 120

ACCGTGAGGC TTAACCTTAC AACGCCGAAG ATGTTTTGGC GGATTGAGAG AAGATTTTCA 180

GCTCAGATTC AGAGTCCGAA GGATTTTACG CTGAGACAAG GCGGCAAACG CAGCGACGGA 240

AGGAGCATA CAGAAGTATGT GACTGACGTT CGCAAGAGCA GCCAACGCCG TATCAGTGTA 300

AAAGACACAG GACAGAGCAC AAAGAATTTG CCTGGCGGCA CTAGCGCGGT GGTCCACCT 360

GACCCCATGC CGAACTCAGA AGTGAAACGC CGTAGCGCCG ATGGTAGTGT GGGGTCTCCC 420

CATGCGAGAG TAGGGAACTG CCAGGCATCA AATTAGAAGT ATGGCATTAA CTTTCGGGGC 480

AGTTCACTAC TCGACAGAGA GTAGGACAAA AGCGAAAGCT TTTGAACGTT GCGAAGCAAC 540

GGCCCGAAGG GTGAATCACG AAGTGATTCA TAAACTGCCA GGCATCAAAT TAAGCAGTAA 600

GCCGGTCATA GACTGGTGGT TGTAACAAAAA TTCGGTGGAG CGGTAGTTCA GTTGGTTAGA 660

ATACCTGCCT GTCACGCAGG GGGTCGCGGG TTCGAGTCCC GTCCGTTCCG CCACTTATTA 720

AGAGCCCTGA GCATTAGCTC AGGGCTTTTT CTTGCCTGT CATTTAATTA TTGCTCAATT 780

CGCAAAAATC CTCTGCATTT TTCGCTCTTT TTCTACAAAG CGCTGAAGGT CATAATCCCC 840

TCAGTTAACG AACATAGTGA TTAAAAAGAG GAATTCTATG ACTATCCCTG CATTTCGGTTT 900

AGGTACTTTT CGCCTGAAAG ACGACGTGGT TATCGCTTCT GTGAAAACGG CGCTTGAACT 960

GGGCTACCGT GCTGTCGACA CTGCGCAAAT CTATGATAAT GAAGCGGCTG TTGGACAGGC 1020

GATTGCTGAG AGCGGCGTAC CGCGTAATGA GCTGTACATC ACCACCAAGA TCTGGATTGA 1080

AAACCTTAGC AAAGACAGCT GATCCCAGCC TGAAAGAGAG CTGAAAAACT GCGTACCGAT 1140

ATGTCGATCT GACGCTGATC ACTGGCCTCT CCGGTGATGC CGGT 1184

>(170)C Meleagridis\_NoNCBImatch

ATGTTTTGGC GGATGAGAGA CGATTTTCAG CAGTGATTCA GAGTTGAGTA CGCAATAATT 60



TGCGCAGCAG CAAGGCGGCA AGCGAAGGAA AGGAAGGAGC ATACAGAAGT ATGTGACTGA 120

GTTTACGAGC GCAGGCAACG CCGCTGATGC GATAAAGAAT TCGTACAGA GCACAAAGAA 180

TTTGCTGGC GGCAGTAGCG CGGTGGTCCC ACCTGACCCC ATGCCGAAC TACAAGTGAA 240

ACGCCGTAGC GCCGATGGTA GTGTGGGGTC TCCCCATGCG AGAGTAGGGA ACTGCCAGGC 300

ATCAAATTAG AAGTATGGCA TTAAC TTTTCG GGCAGTTCA C TACTCGACA GAGAGTAGGA 360

CAAAGCGAA AGCTTTTGAA CGTTGCGAAG CAACGGCCCG AAGGGTGAAT CACGAAGTGA 420

TTCATAAACT GCCAGGCATC AAATTGCAGT AAACCGGGAT GAAAATCCGG GTTGTGACAA 480

AGAAATTCGG TGGAGCGG

498

>(171)C Unique\_NoNCBI match

ATGTTTTGGC GGTTGAGAAG ACAACAATTT TCAGCTCAGA TTCAGAGTCC GAAGGATTTT 60

GCGCTGAGAC AAGGCGGCAA ACGCGGCGAC GGAAGGAGCA TACAGAAGTA TGTGACTGAC 120

GTTCGCAAGA GCAGCCAACG CCGTATCAGC GTAAAAGACA CAGGACAGAG CACAAAGAAT 180

TTGCCTGGCG GCACTAGCGC GGTGGTCCCA CCTGACCCCA TGCCGAACTC AGAAGTGAAA 240

CGCCGTAGCG CCGATGGTAG TGTGGGGTCT CCCCATGCGA GAGTAGGGAA CTGCCAGGCA 300

TCAAATTAGA AGTATGGCAT TAACTTTTCGG GGCAGTTCAC TACTCGACAG AGAGTAGAAC 360

AAAAGCGAAA GCTTTTGAAC GTTGCGAAGC AACGGCCCGA AGGGTGAATC ACGAAGTGAT 420

TCATAAACTG CCAGGCATCA AATTGCAGTA AACCGGGATG AAAATCCGGG TTGTGACAAA 480

GAAATTCGGT GGAGCGG 497

>(172)C Unique\_NoNCBImatch

ATGTTTTGGC GGTTGAGAGA CGATTTTCAG CACTGATTCC GGATTTTCGG GAACGAAAGA 60

TAAAAGATTC GTTCCGGCA ACAGAATTTG CCTGGCGGCA CTAGCGCGGT GGTCCACCT 120

GACCCCATGC CGAACTCAGA AGTGAAACGC CGTAGCGCCG ATGGTAGTGT GGGGTATCCC 180

CATGCGAGAG TAGGGAAGT CCAGGCATCA AATTAGAAGT ATGGCATTAA CTTTCGGGGC 240

AGTTCACTAC TCGACAGAGA GTAGGACAAA AGCGAAAGCT TTTGAACGTT GCGAAGCAAC 300

GGCCCGAAGG GTGAATCACG AAGTGATTCA TAACTGCCA GGCATCAAAT TGCAGTAAAC 360

CGGGATGAAA ATCCGGGTTG TGACAAAGAA ATTCGGTGGA GCGG 404

>(173)C Dublin\_CP032449

ATGTTTTGGC GGATGAGAAG ACGATTTTCA GCAGTGATTG AGAGTTGAGT ACGCAATACT 60

TTGCGCAGCA GCAAGGCGGC AAGCGAAGGA AAGGAAGGAG CATAACAGAAG TATGTGACTG 120

AGTTTACGAG CGCAGGCAAC GCCGCTGATG CGATAAAGAA TTGCGTACAG AGCACAAAGA 180

ATTTGCCTGG CGGCACTAGC GCGGTGGTCC CACCTGACCC CATGCCGAAC TCAGAAGTGA 240

AACGCTGTAG CGCCGATGGT AGTGTGGGGT CTCCCCATGC GAGAGTAGGG AACTGCCAGG 300

CATCAAATTA GAAGTATGGC ATTAAC TTTC GGGGCAGTTC ACTACTCGAC AGAGAGTAGG 360

ACAAAAGCGA AAGCTTTTGA ACGTTGCGAA GCAACGGCCC GAAGGGTGAA TCACGAAGTG 420

ATTCATAAAC TGCCAGGCAT CAAATTGCAG TAAACCGGGA TGAAAATCCG GGTTGTGACA 480

AAGAAATTCG GTGGAGCGG

499

>(174)X Muenchen\_Newport\_CP51389\_CP016014

GAAGAGATAA GTGCTGAAAG CATCTAAGCA CGAAACTTGC CCCGAGATGA GTTCTCCCTG 60

AGACTTAGAG TCTCCTGAAG GAACGTTGAA GACGACGACG TTGATAGGCC GGGTGTGTAA 120

GCGCAGCGAT GCGTTGAGCT AACCGTACT AATGAACCGT GAGGCTTAAC CTTACAACGC 180

CGAAGATGTT TTGGCGGATT GAGAAGACAA CAATTTTCAG CTCAGATTCA GAGTCCGAAG 240

GATTTTACGC TGAGACAAGG CGGCAAACGC AGCGACGGAA GGAGCATACA GAAGTATGTG 300

ACTGACGCTC GCAAGAGCAG CCAACGCCGT ATCAGTGTA AAGACACAGG ACAGAGCACA 360

AAGAATTTGC CTGGCGGCAC TAGCGCGGTG GTCCACCTG ACCCATGCC GAACTCAGAA 420

GTGAAACGCC GTAGCGCCGA TGGTAGTGTG GGGTCTCCCC ATGCGAGAGT AGGGAAGTGC 480

CAGGCATCAA ATTAGAAGTA TGGCATTAAAC TTTCGGGGCA GTTCACTACT CGACAGAGAG 540

TAGGACAAAA GCGAAAGCTT TTGAACGTTG CGAAGCAACG GCCCGAAGGG TGAATCACGA 600

AGTGATTCAT AACTGCCAG GCATCAAATT GCAGTAAACC GGGATGAAAA TCCGGGTTGT 660

GACAAAGAAA TTCGGTGGAG CGGTAGTTCA GTTGGTTAGA ATACCTGCCT GTCACGCAGG 720

GGGTCGCGGG TTCGAGTCCC GTCCGTTCCG CCACTTATTA AGAGCCCTGA GCATTAGCTC 780

AGGGCTTTTT CTTTGCCTGC GATTTAATTA TTGCTCAATT CGCAAAAATC CTCTGCATT 840

CTCGCTCTTT TTCTACAAAG CGCTGAAGGT CATAATCCCC TCAGTTAACG AACATAGTGA 900

TTAGAAAGAG GAATTCTATG ACTATCCCTG CATTGTTTT AGGTACTGTT CGCCTGAAAG 960

ACGACGTGGT TATCGCTTCT GTTAAAACGG CGCTTGAAC TGGCTACCGT GCTGTCGACA 1020

CTGCGCAAAT CTATGATAAT GAAGCGGCTG TTGGACAGGC GATTGCTGAG AGCGGTGTAC 1080

CGCGTAATGA GCTGAATATC ACCACCAAGA TCTGGATTGA AAACCTTAGC AAAGACAAGC 1140

TAATCCCAGG CTGAAAGAGA CCTGATAAA CTGCGTACCG ATTATGTCGA TCTGACGCTG 1200

ATCACTGGCC ATCTCCGGTG ATGCGTGTTG TCAAACAATT ATGC

1244

>(175)C Enteritidis\_CP018633

ATGTTTTGGC GGATGAGAAG ACGATTTTCA GCACTGATTC AGATTACATC AGAACGTAAA 60

AACGGTCTGA TAACAGAATT TGCCTGGCGG CACTAGCGCG GTGGTCCCAC CTGACCCCAT 120

GCCGAACTCA GAAGTGAAAC GCCGTAGCGC CGATGGTAGT GTGGGGTCTC CCCATGCGAG 180

AGTAGGGAAC TGCCAGGCAT CAAATTAGAA GTATGGCATT AACTTTCGGG GCAGTTCACT 240

ACTCGACAGA GAGTAGGACA AAAGCGAAAG CTTTTGAACG TTGCGAAGCA ACGGCCCGAA 300

GGGTGAATCA CGAAGTGATT CATAAACTGC CAGGCATCAA ATTGCAGTAA ACCGGGATGA 360

AAATCCGGGT TGTGACAAAG AAATTCGGTG GAGCGG 396

>(176)C Indiana\_CP022450

ATGTTTTGGC GGATGAGAAG ACGATTTTCA GCACTGATTC AGATTACATC AGAACGTAAA 60

AACGGTCTGA TAACAGAATT TGCCTGGCGG CACTAGCGCG GTGGTCCCAC CTGACCCCAT 120

GCCGAACTCA GAAGTGAAAC GCCGTAGCGC CGATGGTAGT GTGGGGTCTC CCCATGCGAG 180

AGTAGGGAAC TGCCAGGCAT CAAATTAGAA GTATGGCATT AACTTTCGGG GCAGTTCACT 240

ACTCGACAGA GAGTAGGACA AAAGCGAAAG CTTTTGAACG TTGCGAAGCA ACGGCCCGAA 300

GGGTGAATCA CGAAGTGATT CATAAACTGC CAGGCATCAA ATTGCAGTAA ACCGGGATGA 360

AAATCCGGAT TGTGACAAAG AAATTCGGTG GAGCGG

396

>(177)C Derby\_NoNCBImatch

ATGTTTTGGC GGTTGAGAAG ACAGATTTTC AGCTCAGATT CAGAGTTGAG TACGCAATAA 60

TTTGCGCAGC AGCAAGGCGG CAAGCGAAGG AAAGGAAGGA GCATACAGAA GTATGTGACT 120

GACTTTACGA GCGCAGGCAA CGCCGCTGAT GCGATAAAGA ATTGCGTACT GAGCATAAAA 180

GAATTTGCCT GGCGGCACTA GCGCGGTGGT CCCACCTGAC CCCATGCCGA ACTCAGAAGT 240

GAAACGCCGT AGCGCCGATG GTAGTGTGGG GTCTCCCAT GCGAGAGTAG GGAAGTCCCA 300

GGCATCAAAT TAAGCAGTAA GCCGGTCATA AACTGGTGGT TGTAACAAAAA TTCGGTGGAG 360

CGG

363

>(178)C Sendai\_Saintpaul\_NoNCBImatch

ATGTTTTGGC GGTTGAGAAG ACGATTTTCA GCACTGATTC CGGATTTTCG GGGACGAAAG 60

ATAAAAGATT CGTTTCCGGC AACAGAATTT GCCTGGCGGC ACTAGCGCGG TGGTCCCACC 120

TGACCCCATG CCGAACTCAG AAGTGAAACG CCGTAGCGCC GATGGTAGTG TGGGGTCTCC 180

CCATGCGAGA GTAGGGAAGT GCCAGGCATC AAATTAGAAG TATGGCATTACTTTTCGGGG 240

CAGTTCACTA CTCGACAGAG AGTAGGACAA AAGCGAAAGC TTTTGAACGT TGCGAAGCAA 300

CGGCCCCGAAG GGTGAATCAC GAAGTGATT CATAAAGTCC AGGCATCAAA TTGCAGTAAA 360

CCGGGATGAA AATCCGGGTT GTGACAAAGA AATTCGGTGG AGCGG 405

>(179)C Rubislaw\_CP019192

ATGTTTTGGC GGTGAGAGA CGATTTTCAG CACTGATTCC GGATTTTCGG GAACGAAAGA 60

TAAGAGATTC GTTCCGGCA ACAGAATTTG CCTGGCGGCA CTAGCGCGGT GGTCCACCT 120

GACCCCATGC CGAACTCAGA AGTGAAACGC CGTAGCGCCG ATGGTAGTGT GGGGTCTCCC 180

CATGCGAGAG TAGGGAAGT CCAGGCATCA AATTAGAAGT ATGGCATTAA CTTTCGGGGC 240

AGTTCACTAC TCGACAGAGA GTAGGACAAA AGCGAAAGCT TTTGAACGTT GCGAAGCAAC 300

GGCCCCGAAGG GTGAATCACG AAGTGATTCA TAAACTGCCA GGCATCAAAT TAAGCAGTAA 360

GCCGGTCATA AACCGGTGGT TGTAAGAGAA TTCGGTGGAG CGG 403

>(180)C Reading\_NoNCBI match

ATGTTTTGGC GGTGAGAAG ACAACAATTT TCAGCTCAGA TTCAGAGTCC GAAGGATTTT 60

ACGCTGAGAC AAGGCGGCAA ACGCAGCGAC GGAAGGAGCA TACAGAAGTA TGTGACTGAC 120

GTTCGCAAGA GCAGCCAACG CCGTATCAGT GTAAAGACA CAGGACAGAG CACAAAGAAT 180

TTGCCTGGCG GCACTAGCGC GGTGGTCCCA CCTGACCCCA TGCCGAACTC AGAAGTGAAA 240

CGCCGTAGCG CCGATGGTAG TGTGGGGTCT CCCCATGCGA GAGTAGGGAA CTGCCAGGCA 300

TCAAATTAGA AGTATGGCAT TAACTTTCGG GGCAGTTCAC TACTCGACAG AGAGTAGGAC 360

AAAAGCGAAA GCTTTTGAAC GTTGCGAAGC AACGGCCCGA AGGGTGAATC ACGAAGTGAT 420

TCATAAACTG CCAGGCATCA AATTGCAGTA AACCGGGATG AAAATCCGGG TTGTGACAAA 480

GAAATTCGGT GGAGCGG

497

>(181)C Saintpaul\_CP053055

ATGTTTTGGC GGATTGAGAG AAGATTTTCA GCACTGATTC CGGATTTTCG GGAACGAAAG 60

ATTTTACGCT GAGGCAAGGC GGCAAATGAA GGAAAGGAAG GAGCATACAG AAGTATGTGA 120

CTGACTTTAC GAATGCAGCC AACGCAGCAT CGGTGTAAAA GATTCGTTTC CGGCAACAGA 180

ATTTGCCTGG CGGCCGTAGC GCGGTGGTCC CACCTGACCC CATGCCGAAC TCAGAAGTGA 240

AACGCCGTAG CGCCGATGGT AGTGTGGGGT CTCCCCATGC GAGAGTAGGG AACTGCCAGG 300

CATCAAATTA GAAGTATGGC ATTAAC TTTC GGGGCAGTTC ACTACTCGAC AGAGAGTAGG 360

ACAAAAGCGA AAGCTTTTGA ACGTTGCGAA GCAACGGCCC GAAGGGTGAA TCACGAAGTG 420



ATTCATAAAC TGCCAGGCAT CAAATTAAGC AGTAAACTGA TGAAAAATC AGTGGTTGTA 480

AAAGAATTCG GTGGAGCGG 499

>(182)C Unique\_NoNCBImatch

CTGTTTTGGC GGATGAGAGA AGATTTTCAG CCTGATACAG ATTAATCAG AACGCAGAAG 60

CGGTCTGATA AACAGAATT TGCCTGGCGG CCGTAGCGCG GTGGTCCCAC CTGACCCCAT 120

GCCGAACTCA GAAGTGAAAC GCCGTAGCGC CGATGGTAGT GTGGGGTATC CCCATGCGAG 180

AGTAGGGAAC TGCCAGGCAT CAAATTAAGC AGTAAGCCGG TCATAAAACC GGTGGTTGTA 240

AAAGAATTCG GTGGAGCGG 259

>(183)C Miami\_NoNCBImatch

ATGTTTTGGC GGTTGAGAGA TGATTTTCAG CACTGATTCA GATTACATCA GAACGTAAAA 60

ACGGTCTGAT AACAGAATTT GCCTGGCGGC ACTAGCGCGG TGGTCCCACC TGACCCCATG 120

CCGAACTCAG AAGTGAAACG CCGTAGCGCC GATGGTAGTG TGGGGTCTCC CCATGCGAGA 180

GTAGGGAAC GCCAGGCATC AATTTAAGCA GTAAACTGAT GTAAAAATCA GTGGTTGTAA 240

AAGAATTCGG TGGAGCGG 258

>(184)X Saintpaul\_St Stanleyville\_CP017727\_CP034716

GAAGAGATAA GTGCTGAAAG CATCTAAGCA CGAAACTTGC CCCGAGATGA GTTCTCCCTG 60

AGACTTTAAG TCTCCTGAAG GAACGTTGAA GACGACGACG TTGATAGGCC GGGTGTGTAA 120

GCGCAGCGAT GCGTTGAGCT AACCGGTACT AATGAACCGT GAGGCTTAAC CTTACAACGC 180

CGAAGATGTT TTGGCGGATG AGAGACGATT TTCAGCACTG ATTCCGGATT TTCGGGAACG 240

AAAGATTTTA CGCTGAGGCA AGGCGGCAAA TGAAGGAAAG GAAGGAGCAT ACAGAAGTAT 300

GTGACTGACT TTGCGAATGC AGCCAACGCA GCATCGGTGT AAAAGATTTCG TTTCCGGTAA 360

CAGAATTTGC CTGGCGGCAC TAGCGCGGTG GTCCACCTG ACCCATGCC GAACTCAGAA 420

GTGAAACGCC GTAGCGCCGA TGGTAGTGTG GGGTCTCCCC ATGCGAGAGT AGGGAACCTGC 480

CAGGCATCAA ATTAAGCAGT AAACTGATGT AAAAATCAGT GGTTGTAAAA GAATTCGGTG 540

GAGCGGTAGT TCAGTTGGTT AGAATACCTG CCTGTACGC AGGGGGTCGC GGGTTCGAGT 600

CCCGTCCGTT CCGCCACTTA TTAAGAGCCC TGAGCATTAG CTCAGGGCTT TTTCTTTGCC 660

TGTCATTTAA TTATTGCTCA ATTCGCAAAA ATCCTCTGCA TTTCTCGCTC TTTTCTGCA 720

AAGCGCTGAA GGCATAATC CCCTCAGTTA ACGAACATAG TGATTAATAA GAGGAATTCT 780

ATGACTATCC CTGCATTCCG TTAGGTACT TTTCGCCTGA AAGACGACGT GGTTATCGCT 840

TCTGTGAAAA CGGCGCTTGA ACTGGGCTAC CGTGCTGTCTG AACTGCGCA AATCTATGAT 900

AATGAAGCGG CTGTTGGACA GGCGATTGCT GAGAGCGGCG TACCGCGTAA TGAGCTGTAC 960

ATCACCACCA AGATCTGGAT TGAAAACCTT AGCAAAGACA AACTAATCCC AAGCCTGCAA 1020

GAGAGCCTGA AAAAAGTGG TACCGATTAT GTCGATCTGA CGCTGATCCA CTGGCCATCT 1080

CCGGGTGATG CCGTGTCTGT CGAAGAATTT ATGCAGGCAT TGCTGGAAGC TAAAAACAA 1140

GGGCTGACTC GCGAAATTGG CATCTCAAAC TTCACATTCC GTTGATGGAA AAGGTATTGC 1200

CGCGTGGGCG CAGACATATC GCACCAACCA GATGAACTA 1239

>(185)C Paratyphi-A\_CP009559

ATGTTTTGGC GGATGAGAGA CGATTTTCAG CACTGATTCC GGATTTTCGG GAACGAAAGA 60

TTTTACGCTG AGGCAAGGCG GCAAATGAAG GAAAGGAAGA AGCATACAGA AGTATGTGAC 120

TGACTTTACG AATGCAGCCA ACGCAGCATC GGTGTAAGG ATTCGTTTCT GGCAACAGAA 180

TTTGCCTGGC GGCAGTAGCG CGGTGGTCCC ACCTGACCCC ATGCCGAAGT CAGAAGTGAA 240

ACGCCGTAGC GCCGATGGTA GTGTGGGGTC TCCCCATGCG AGAGTAGGGA ACTGCCAGGC 300

ATCAAATTAG AAGTATGGCA TTAACTTTCG GGGCAGTTCA CTAAGCGACA GAGAGTAGGA 360

CAAAGCGAA AGCTTTTGAA CGTTGCGAAG CAACGGCCCG AAGGGTGAAT CACGAAGTGA 420

TTCATAAACT GCCAGGCATC AAATTAAGCA GTAAACTGAT GTAAAAATCA GTGGTTGTAA 480

AAGAATTCGG TGGAGCGG

498

>(186)C Nottingham\_NoNCBImatch

ATGTTTTGGC GGACTGAGAA GACGAACAAT TTTCAGCTTT GATTCAGAGT TGAGTACGCA 60

ATAATTTGCG CAGCAGCAAG GCGGCAAGCG AAGGAAAGGA AGGAGCATAC AGAAGTATGT 120

GACTGAGTTT ACGAGCGCAG GCAACGCCGC TGATGCGATA AAGAATTGCG TACTGAGCAC 180

AAAAGAATTT GCCTGGCGGC CGTAGCGCGG TGGTCCCACC TGACCCCATG CCGAACTCAG 240

AAGTGAAACG CCGTAGCGCC GATGGTAGTG TGGGGTCTCC CCATGCGAGA GTAGGGA ACT 300

GCCAGGCATC AAATTAGAAG TATGGCATT ACTTTCTGGG CAGTTC ACTA CTCGACAGAG 360

AGTAGGACAA AAGCGAAAGC TTTTGAACGT TGCGAAGCAA CGGCCCGAAG GGTGAATCAC 420

GAAGTGATTC ATAACTGCC AGGCATCAAA TTGCAGTAAA CCGGGATGAA AATCCGGGTT 480

GTGACAAAGA AATTCGGTGG AGCGG

505

>(187)C Typhimurium\_NC\_021814

ATGTTTTGGC GGTTAAGAGA AGATTTTCAG CACTGATTCC GGATTTTCGG GAACGAAAGA 60

TTTTACGCTG AGGCAAGGCG GCAAGCGAAG GAAAGGAAGG AGCATACAGA AGTATGTGAC 120

TGACTTTACG AGCGCAGGCA ACGCCGCTGA TGCATAAAG AATTGCGTAC AGAGCACAAA 180

GAATTTGCCT GGCGGCACTA GCGCGGTGGT CCCACCTGAC CCCATGCCGA ACTCAGAAGT 240

GAAACGCCGT AGCGCCGATG GTAGTGTGGG GTCTCCCAT GCGAGAGTAG GGAAGTGCCA 300

GGCATCAAAT TAGAAGTATG GCATTAECTT TCGGGGCAGT TCACTACTCG ACAGAGAGTA 360

GGACAAAAGC GAAAGCTTTT GAACGTTGCG AAGCAACGGC CCGAAGGGTG AATCACGAAG 420

TGATTCATAA ACTGCCAGGC ATCAAATTA GCAGTAACT GATGTAAAAA TCAGTGGTTG 480

TAAAAGAATT CGGTGGAGCG G

501

>(188)C Typhimurium\_NC\_016860

ATGTTTTGGC GGATTGAGAA GACAACAATT TTCAGCTCAG ATTCAGAGTC CGAAGGATTT 60

TACGCTGAGA CAAGGCGGCA AACGCAGCGA CGGAAGGAGC ATACAGAAGT ATGTGACTGA 120

CGCTCGCAAG AGCAGCCAAC GCCGTATCAG TGTAAGAGAC ACAGGACGGA GCACAAAGAA 180

TTTGCTGGC GGCCTAGCG CGGTGGTCCC ACCTGACCCC ATGCCGAAGT CAGAAGTGAA 240

ACGCCGTAGC GCCGATGGTA GTGTGGGGTC TCCCATGCG AGAGTAGGGA ACTGCCAGGC 300

ATCAAATTAG AAGTATGGCA TTAACCTTCG GGGCAGTTCA CTACTIONGACA GAGAGTAGGA 360

CAAAAGCGAA AGCTTTTGAA CGTTGCGAAG CAACGGCCCG AAGGGTGAAT CACGAAGTGA 420

TTCATAAACT GCCAGGCATC AAATTAAGCA GCAAACCTGAT GTAAAAATCA GTGGTTGTAA 480

AAGAATTCGG TGGAGCGG 498

>(189)C Typhimurium\_NoNCBImatch

ATGTTTTGGC GGATTGAGAA GACAACAATT TTCAGCTCAG ATTCAGAGTC CGAAGGATT 60

TACGCTGAGA CAAGGCGGCA AACGCAGCGA CGGAAGGAGC ATACAGAAGT ATGTGACTGA 120

CGCTCGCAAG AGCAGCCAAC GCCGTATCAG TGTAAGAGAC ACAGAACGGA GCACAAAGAA 180

TTGCTGGC GGCCGTAGCG CGGTGGTCCC ACCTGACCCC ATGCCGAAC CAGAAGTGAA 240

ACGCCGTAGC GCCGATGGTA GTGTGGGGTC TCCCATGCG AGAGTAGGGA ACTGCCAGGC 300

ATCAAATTAG AAGTATGGCA TTAACCTTCG GGGCAGTTCA CTACTIONGACA GAGAGTAGGA 360

CAAAAGCGAA AGCTTTTGAA CGTTGCGAAG CAACGGCCCG AAGGGTGAAT CACGAAGTGA 420

TTCATAAACT GCCAGGCATC AAATTAAGCA GTAAACCTGAT GTAAAAATCA GTGGTTGTAA 480

AAGAATTCGG TGGAGCGG 498

>(190)C Gaminara\_NoNCBImatch

ATGTTTTGGC GGATTGAGAG AAGATTTTCA GCTCAGATTC AGAGTCCGAA GGATTTTACG 60

CTGAGACAAG GCGGCAAACG CAGCGACGGA AGGAGCATAc AGAAGTATGT GACTGACGTT 120

CGCAAGAGCA GCCAACGCCG TATCAGTGTA AAAGACACAG GACAGAGCAC AAAGAATTTG 180

CCTGGCGGCA CTAGCGCGGT GGTCCACCT GACCCCATGC CGAACTCAGA AGTGAAACGC 240

CGTAGCGCCG ATGGTAGTGT GGGGTCTCCC CATGCGAGAG TAGGGAActG CCAGGCATCA 300

AATTAGAAGT ATGGCATTAA CTTTCGGGGC AGTTCActAC TCGACAGAGA GTAGGACAAA 360

AGCGAAAGCT TTTGAACGTT GCGAAGCAAC GGCCCGAAGG GTGAATCACG AAGTGATTCA 420

TAAACTGCCA GGCATCAAAT TAAGCAGTAA GCCGGTCATA GACTGGTGGT TGTAaaaaaa 480

TTCGGTGGAG CGG

493

>(191)C Schwarzengrund\_NoNCBImatch

ATGTTTTGGC GGTTGAGAGA TGATTTTCAG CACTGATTCC GGATTTTCGG GAACGAAAGA 60

TAAAAGATTC GTTCCGGCA ACAGAATTTG CCTGGCGGCA CTAGCGCGGT GTCCACCT 120

GACCCCATGC CGAACTCAGA AGTGAAACGC CGTAGCGCCG ATGGTAGTGT GGGGTCTCCC 180

CATGCGAGAG TAGGGAActG CCAGGCATCA AATTAAGCAG TAAGCCGGTC ATAAACCGGT 240

GGTTGTAaaa GAATCCGGTG GAGCGG

266

>(192)C Enteritidis\_CP009083

ATGTTTTGGC GGATGAGAAG ACGATTTTCA GCAGTGATTC AGAGTTGAGT ACGCAATACT 60

TTGCGCAGCA GCAAGGCGGC AAGCGAAGGA AAGGAAGGAG CATAACAGAAG TATGTGACTG 120

AGTTTACGAG CGCAGGCAAC GCCGCTGATG CGATAAAGAA TTGCGTACAG AGCACAAAGA 180

ATTTGCCTGG CGGCACTAGC GCGGTGGTCC CACCTGACCC CATGCCGAAC TCAGAAGTGA 240

AACGCCGTAG CGCCGATGGT AGTGTGGGGT CTCCCCATGC GAGAATGTTG AATAGCAGTT 300

TGGTTCGCAG GCGAACGCCT ATTTACATAG CGCCGTTTAC GGTAGGGAAC TGCCAGGCAT 360

CAAATTAGAA GTATGGCATT AACTTTCGGG GCAGTTCACT ACTCGACAGA GAGTAGGACA 420

AAAGCGAAAG CTTTTGAACG TTGCGAAGCA ACGGCCCGAA GGGTGAATCA CGAAGTGATT 480

CATAAACTGC CAGGCATCAA ATTGCAGTAA ACCGGGATGA AAATCCGGGT TGTGACAAAG 540

AAATTCGGTG GAGCGG

556

>(193)C Kentucky\_CP082602

ATGTTTTGGC GTTGAGAGAC GATTTTCAGC ACTGATTCAG ATTACATCAG AACGTAAAAA 60

CGGTCTGATA ACAGAATTTG CCTGGCGGCA CTAGCGCGGT GGTCCACCT GACCCCATGC 120



CGAACTCAGA AGTGAAACGC CGTAGCGCCG ATGGTAGTGT GGGGTCTCCC CATGCGAGAG 180

TAGGGAAGT CCAGGCATCA AATTAGAAGT ATGGCATTAA CTTTCGGGGC AGTTCACTAC 240

TCGACAGAGA GTAGGACAAA AGCGAAAGCT TTTGAACGTT GCGAAGCAAC GGCCCGAAGG 300

GTGAATCACG AAGTGATTCA TAAACTGCCA GGCATCAAAT TGCAGTAAAC CGGGATGAAA 360

ATCCGGATTG TGACAAAGAA ATTCGGTGGA GCGG 394

>(194)C Mbandaka\_NoNCBI match

ATGTTTTGGC GGTGAGAGAC AATTTTCAGC AGTGATTGAGTAC GCAATAATTT 60

GCGCAGCAGC AAGGCGGCAA GCGAAGGAAA GGAAGGAGCA TACAGAAGTA TGTGACTGAC 120

TTTACGAGCG CAGGCAACGC CGCTGATGCG ATAAAGAATT GCGTACAGAG CACAAAAGAA 180

TTTGCCTGGC GGCCGTAGCG CGGTGGTCCC ACCTGACCCC ATGCCGAAGT CAGAAGTGAA 240

ACGCCGTAGC GCCGATGGTA GTGTGGGGTC TCCCATGCG AGAGTAGGGA ACTGCCAGGC 300

ATCAAATTAG AAGTATGGCA TTAACITTCG GGGCAGTTCA CTAATCGACA GAGAGTAGAA 360

CAAAGCGAA AGCTTTTGAA CGTTGCGAAG CAACGGCCCG AAGGGTGAAT CACGAAGTGA 420

TTCATAAACT GCCAGGCATC AAATTGCAGT AAACCGGGAT GAAAATCCGG GTTGTGACAA 480

AGAAATTCGG TGGAGCGG

498

>(195)C Falkensee\_NoNCBImatch

ATGTTTTGGC GGATGAGAGA CGATTTTCAG CACTGATTCC GGATTTTCGG GAACGAAAGA 60

TTTTACGCTG AGGCAAGGCG GCAAATGAAG GAAAGGAAGG AGCATACAGA AGTATGTGAC 120

TGACTTTGCG AATGCAGCCA ACGCAGCATC GGTGTAAAAG ATTCGTTTCC GGTAACAGAA 180

TTTGCTGGC GGCCTAGCG CGGTGGTCCC ACCTGACCCC ATGCCGA ACT CAGAAGTGAA 240

ACGCCGTAGC GCCGATGGTA GTGTGGGGTC TCCCATGCG AGAGTAGGGA ACTGCCAGGC 300

ATCAAATTAG AAGTATGGCA TTAAC TTTTCG GGGCAGTTCA C TACTCGACA GAGAGTAGGA 360

CAAAAGCGAA AGCTTTTGAA CGTTGCGAAG CAACGGCCAG AAGGGTGAAT CACGAAGTGA 420

TTCATAAACT GCCAGGCATC AAATTGCAGT AACTGATGT AAAAAATCAGT GGTTGTAAAA 480

GAATTCGGTG GAGCGG

496

>(196)C Typhimurium\_CP082526

ATGTTTTGGC GGTTGAGAGA CGATTTTCAG CTCAGATTCA GAGTCCGAAG GATTTTACGC 60

TGAGACAAGG CGGCAAACGC AGCGACGGAA GGAGCATACA GAAGTATGTG ACTGACGCTC 120

GCAAGAGCAG CCAACGCCGT ATCAGTGTA AAGACACAGG ACGGAGCACA AAGAATTTGC 180

CTGGCGGCAC TAGCGCGGTG GTCCACCTG ACCCATGCC GAACTCAGAA GTGAAACGCC 240

GTAGCGCCGA TGGTAGTGTG GGGTCTCCCC ATGCGAGAGT AGGGAAGTGC CAGGCATCAA 300

ATTAGAAGTA TGGCATTAACT TTTCTGGGGCA GTTCACTACT CGACAGAGAG TAGGACAAAA 360

GCGAAAGCTT TTGAACGTTG CGAAGCAACG GCCCGAAGGG TGAATCACGA AGTGATTCAT 420

AAACTGCCAG GCATCAAATT AAGCAGTAAA CTGATGTAAA AATCAGTGGT TGTAAGAGAA 480

TTCGGTGGAG CGG

493

>(197)C Heidelberg\_CP012921

ATGTTTTGGC GGATTGAGAA GACAACAATT TTCAGCTCAG ATTCAGAGTC CGAAGGATTT 60

TACGCTGAGA CAAGGCGGCA AACGCAGCGA CGGAAGGAGC ATACAGAAGT ATGTGACTGA 120

CGCCCGCAAG AGCAGTCAAC GCCGTATCAG TGTAAGAGAC ACAGGACAGA GCACAAAGAA 180

TTTGCTGGC GGCAGTAGCG CGGTGGTCCC ACCTGACCCC ATGCCGAAGT CAGAAGTGAA 240

ACGCCGTAGC GCCGATGGTA GTGTGGGGTC TCCCCATGCG AGAGTAGGGA ACTGCCAGGC 300

ATCAAATTAG AAGTATGGCA TTAACCTTCG GGGCAGTTCA CTAAGCGACA GAGAGTAGGA 360

CAAAAGCGAA AGCTTTTGAA CGTTGCGAAG CAACGGCCCG AAGGGTGAAT CACGAAGTGA 420

TTCATAAACT GCCAGGCATC AAATTGCAGT AAACCGGGAT GAAAATCCGG GTTGTGACAA 480

AGAAATTCGG TGGAGCGG

498

>(198)C Infantis LS483479

ATGTTTTGGC GGATGAGAAG ACGATTTTCA GCACTGATTC AGAGTTGAGT ACGCAATAAT 60

TTGCGCAGCA GCAAGGCGGC AAGCGAAGGA AAGGAAGGAG CATAACAGAAG TATGTGACTG 120

AGTTTACGAG CGCAGGCAAC GCCGCTGATG CGATAAAGAA TTGCGTACAG AGCACAAAGA 180

ATTTGCCTGG CGGCAGTAGC GCGGTGGTCC CACCTGACCC CATGCCGAAC TCAGAAGTGA 240

AACGCCGTAG CGCCGATGGT AGTGTGGGGT CTCCCCATGC GAGAGTAGGG AACTGCCAGG 300

CATCAAATTA GAAGTATGGC ATTAAC TTTC GGGGCAGTTC ACTACTCGAC AGAGAGTAGG 360

ACAAAAGCGA AAGCTTTTGA AC GTT GCGAA GCAACGGCCC GAAGGGTGAA TCACGAAGTG 420

ATTAATAAAC TGCCAGGCAT CAAATTGCAG TAAACCGGGA TGAAAATCCG GGTTGTGACA 480

AAGAAATTCG GTGGAGCGG

499

>(199)C Newport\_Abaetetuba\_CP016357\_CP074211

CCGCTCCACC GAATTCTTTT ACAACCACTG ATTTTACAT CAGTTTACTG CTTAATTTGA 60

TGCCTGGCAG TTTATGAATC ACTTCGTGAT TCACCCTTCG GGCCGTTGCT TCGCAACGTT 120

CAAAAGCTTT CGCTTTTGTC CTA CTCTCTG TCGAGTAGTG AACTGCCCCG AAAGTTAATG 180

CCATACTTCT AATTTGATGC CTGGCAGTTC CCTACTCTCG CATGGGGAGA CCCCACACTA 240

CCATCGGCGC TACGGCGTTT CACTTCTGAG TTCGGCATGG GGTCAGGTGG GACCACCGCG 300

CTACTGCCGC CAGGCAAATT CTGTTACCGG AAACGAATCT TTTACACCGA TGCTGCGTTG 360

GCTGCATTG CAAAGTCAGT CACATACTTC TGTATGCTCC TTCCTTCTC TCATTTGCCG 420

CCTTGCCTCA GCGTAAAATC TTTCGTTCCC GAAAATCCGG AATCAGTGCT GAAAATCGTC 480

TTCATCCGC CAAAACAT

498

>(200)C Moscow\_CP019415

ATGTTTTGGC GGATGAGAAG ACGATTTTCA GCAGTGATTC AGAGTTGAGT ACGCAATAAT 60

TTGCGCAGCA GCAAGGCGGC AAGCGAAGGA AAGGAAGGAG CATA CAGAAG TATGTGACTG 120

AGTTTACGAG CGCAGGCAAC GCCGCTGATG CGATAAAGAA TTGCGTACAG AGCATAAAAG 180

AATTTGCCTG GCGGCACTAG CGCGGTGGTC CCACCTGACC CCATGCCGAA CTCAGAAGTG 240

AAACGCCGTA GCGCCGATGG TAGTGTGGGG TCTCCCATG CGAGAGTAGG GAACTGCCAG 300

GCATCAAATT AGAAGTATGG CATTAACTTT CGGGGCAGTT CACTACTCGA CAGAGAGTAG 360

GACAAAAGCG AAAGCTTTTG AACGTTGCGA AGCAACGGCC CGAAGGGTGA ATCACGAAGT 420

GATTCATAAA CTGCCAGGCA TCAAATTGCA GTAAACCGGG ATGAAAATCC GGGTTGTGAC 480

AAAGAAATTC GGTGGAGCGG 500

>(201)C Typhimurium\_CP011428

ATGTTTTGGC GGATGAGAAG ACGATTTTCA GCAGTGATTG CGGATTTTCG GGAACGAAAG 60

ATTTTACGCT GAGGCAAGGC GGCAAATGAA GGAAAGGAAG GAGCATACAG AAGTATGTGA 120

CTGACTTTAC GAATGCAGCC AACGCAGCAT CGGTGTAAAA GATTGTTTC TGGCAACAGA 180

ATTTGCCTGG CGGCACTAGC GCGGTGGTCC CACCTGACCC CATGCCGAAC TCAGAAGTGA 240

AACGCCGTAG CGCCGATGGT AGTGTGGGGT CTCCCCATGC GAGAGTAGGG AACTGCCAGG 300

CATCAAATTA GAAGTATGGC ATTAAC TTTC GGGGCAGTTC ACTACTCGAC AGAGAGTAGG 360

ACAAAAGCGA AAGCTTTTGA ACGTTGCGAA GCAACGGCCC GAAGGGTGAA TCACGAAGTG 420

ATTCATAAAC TGCCAGGCAT CAAATTAAGC AGTAAACTGA TGTA AAAATC AGTGGTTGTA 480

AAAGAATTCG GTGGAGCGG 499

>(202)C Blegdam\_CP019406

ATGTTTTGGC GGATGAGAAG ACGATTTTCA GCAGTGATTG AGAGTTGAGT ACGCAATACT 60

TTGCGCAGCA GCAAGGCGGC AAGCGAAGGA AAGGAAGGAG CATAACAGAAG TATGTGACTG 120

AGTTTACGAG CGCAGGCAAC GCCGCTGATG CGATAAAGAA TTGCGTACAG AGCATAAAAG 180

AATTTGCCTG GCGGCACTAG CGCGGTGGTC CCACCTGACC CCATGCCGAA CTCAGAAGTG 240

AAACGCCGTA GCGCCGATGG TAGTGTGGGG TCTCCCATG CGAGAGTAGG GAACTGCCAG 300

GCATCAAATT AGAAGTATGG CATTAACTTT CGGGGCAGTT CACTACTCGA CAGAGAGTAG 360

GACAAAAGCG AAAGCTTTTG AACGTTGCGA AGCAACGGCC CGAAGGGTGA ATCACGAAGT 420

GATTCATAAA CTGCCAGGCA TCAAATTGCA GTAAACCGGG ATGAAAATCC GGGTTGTGAC 480

AAAGAAATTC GGTGGAGCGG 500

>(203)C Wandsworth\_CP019417

ATGTTTTGGC GGATGAGAAG ACGATTTTCA GCAGTGATTC AGAGTTGAGT ACGCAATAAT 60

TTGCGCAGCA GCAAGGCGGT AAGCGAAGGA AAGGAAGGAG CATAACAGAAG TATGTGACTG 120

AGTTTACGAG CGCAGGCAAC GCCGCTGATG CGATAAAGAA TTGCGTACAG AGCACAAAGA 180

ATTTGCCTGG CGGCACTAGC GCGGTGGTCC CACCTGACCC CATGCCGAAC TCAGAAGTGA 240

AACGCCGTAG CGCCGATGGT AGTGTGGGGT CTCCCATGC GAGAGTAGGG AACTGCCAGG 300

CATCAAATTA GAAGTATGGC ATTAACCTTC GGGGCAGTTC ACTACTCGAC AGAGAGTAGG 360

ACAAAAGCGA AAGCTTTTGA ACGTTGCGAA GCAACGGCCC GAAGGGTGAA TCACGAAGTG 420

ATTCATAAAC TGCCAGGCAT CAAATTGCAG TAAACCGGGA TGAAAATCCG GGTGTGACA 480

AAGAAATTCG GTGGAGCGG 499

>(204)C Hillingdon\_CP019410

ATGTTTTGGC GGTGAGAGA CGATTTTCAG CACTGATTCA GAGTTGAGTA CGCAATAATT 60

TGCGCAGCAG CAAGGCGGCA AGCGAAGGAA AGGAAGGAGC ATACAGAAGT ATGTGACTGA 120

CTTTACGGGC GCAGGCAACG CCGCTGATGC GATAAAGAAT TCGGTACAGA GCACAAAGAA 180

TTTGCCTGGC GGCCTAGCG CGGTGGTCCC ACCTGACCCC ATGCCGAAGT CAGAAGTGAA 240

ACGCCGTAGC GCCGATGGTA GTGTGGGGTC TCCCATGCG AGAGTAGGGA ACTGCCAGGC 300

ATCAAATTAG AAGTATGGCA TTAAC TTTCG GGGCAGTTCA CTA CTGACA GAGAGTAGGA 360

CAAAAGCGAA AGCTTTTGAA CGTTGCGAAG CAAGGGCCTG AAGGGTGAAT CACGAAGTGA 420

TTCATAAACT GCCAGGCATC AAATTAAGCA GTAAACTGAT GTAAAAATCA GTGGTTGTAA 480

AAGAATTCGG TGGAGCGG 498

>(205)X Newport\_Derby\_NC\_021902\_CP075036



CTAAGGTTTT CAATCCAGAT CTTGGTGGTG ATGTACAGCT CGCTACGTGG TACGCCGCTC 60

TCAGTAATCG CCTGTCCAAC AGCCGCTTCA TTATCATAGA TTTGCGCAGT GTCGACAGCA 120

CGGTAGCCCA GTTCAAGCGC CGTTTTACA GAAGCGATAA CCACGTCGTC TTTCAGGCGA 180

AAAGTACCTA AACCGAATGC AGGGATAGTC ATAGAATTCC TCTTTTTAAT CACTATGTTC 240

GTAACTGAG GGGATTATGA CCTTCAGCGC TTTGTAGAAA AAGAGCGAGA AATGCAGAGG 300

ATTTTTGCGA ATTGAGCAAT AATTAAATCG CAGGCAAAGA AAAAGCCCTG AGCTAATGCT 360

CAGGGCTCTT AATAAGTGGC GGAACGGACG GGAAGTGAAC CCGCGACCCC CTGCGTGACA 420

GGCAGGTATT CTAACCAACT GAACTACCGC TCCACCGAAT TCTTTTACAA CCACTGATTT 480

TTACATCAGT TTAAGTCTTA ATTTGATGCC TGGCAGTTTA TGAATCACTT CGTGATTCAC 540

CCTTCGGGCC GTTGCTTCGC AACGTTCAA AGCTTTCGCT TTTGTCCTAC TCTCTGTCGA 600

GTAGTGAAGT GCGCCGAAAG TTAATGCCAT ACTTCTAATT TGATGCCTGG CAGTTCCTTA 660

CTCTCGCATG GGGAGACCCC AACTACCAT CGGCGCTACG GCGTTTCACT TCTGAGTTCTG 720

GCATGGGGTC AGGTGGGACC ACCGCGCTAG TGCCGCCAGG CAAATTCTGT TACCGGAAAC 780

GAATCTTTTA CACCGATGCT GCGTTGGCTG CATTGCGAAA GTCAGTCACA TACTTCTGTA 840

TGCTCCTTCC TTTCTTCAT TTGCCGCTT GCCTCAGCGT AAAATCTTTC GTTCCCGAAA 900

ATCCGGAATC AGTGCTGAAA ATCGTCTCTC ATCCGCCAAA ACATCTTCGG CGTTGTAAGG 960

TTAAGCCTCA CGGTTCATTG GTACCGGTTA GCTCAACGCA TCGCTGCGCT TACACACCCG 1020

GCCTATCAAC GTCGTCGTCT TCAACGTTCC TTCAGGAGAC TCTAAGTCTC AGGGAGAACT 1080

CATCTCGGGG CAAGTTTCGT GCTTAGATGC TTTC 1115

>(206)C Krefeld\_CP019413

ATGTTTTGGC GGATTGAGAA GACAACAATT TTCAGCTCAG ATTCAGAGTC CGAAGGATTT 60

TACGCTGAGA CAAGGCGGCA AACGCAGCGA CGGAAGGAGC ATACAGAAGT ATGTGACTGA 120

CGCTCGCAAG AGCAGCCAAC GCCGTATCAG TGTAAGAGAC ACAGGACAGA GCACAAAGAA 180

TTTGCTGGC GGCCTAGCG CGGTGGTCCC ACCTGACCCC ATGCCGAAGT CAGAAGTGAA 240

ACGCCGTAGC GCCGATGGTA GTGTGGGGTC TCCCATGCG AGAGTAGGGA ACTGCCAGGC 300

ATCAAATTAG AAGTATGGCA TTAACITTCG GGGCAGTTCA CTAATCGACA GAGAGTAGGA 360

CAAAAGCGAA AGCTTTTGAA CGTTGCGAAG CAACGGCCCG AAGGGTGAAT CACGAAGTGA 420

TTCATAAACT GCCAGGCATC AAATTGCAGT AAACCGGGAT GAAAATCCGG ATTGTGACAA 480

AGAAATTCGG TGGAGCGG

498

>(207)C Macclesfield\_CP022117

CCGCTCCACC GAATTCTTTT ACAACCACTG ATTTTACAT CAGTTTACTG CTTAATTTGA 60

TGCCTGGCAG TTTATGAATC ACTTCGTGAT TCACCCTTCG GGCCGTTGCT TCGCAACGTT 120

CAAAAGCTTT CGCTTTTGTC CTA CTCTCTG TCGAGTAGTG AACTGCCCG AAAGTTAATG 180

CCATACTTCT AATTTGATGC CTGGCAGTTC CCTACTCTCG CATGGGGAGA CCCCACTA 240

CCATCGGCGC TACGGCGTTT CACTTCTGAG TTCGGCATGG GGTCAGGTGG GACCACCGCG 300

CTACGGCCGC CAGGCAAATT CTTTGTGCTC GGTACGCAAT ATTTTATCGC ATCAGCGGCG 360

TTGGCTGCAT TTGCGCTCGT CAGTCACATA CTTCAGTATG CTCCTCCGA CGCTGCATTT 420

GCCGCCTTGC TGCTGCGCAA ACTATTGCGC ACTGCAATCT GTATCGAAGC TGAAAATCTC 480

TCATCCGCCA AAACAT

496

>(208)X\_Enteritidis\_CP018642

TCGGTACGCA GTTTTTTCAG GCTCTCTTC AGGCTTGGGA TTAGCTTGTC TTTGCTAAGG 60

TTTTCAATCC AGATCTTGGT GGTGATGTAC AGCTCATTAC GCGGTACGCC GCTCTCAGCA 120

ATCGCCTGTC CAACAGCCGC TTCATTATCA TAGATTTGCG CAGTGTCGAC AGCACGGTAG 180

CCCAGTTCAA GCGCCGTTTT CACAGAAGCG ATAACCACGT CGTCTTTCAG GCGAAAAGTA 240

CCTAAACCGA ATGCAGGGAT AGTCATAGAA TTCCTCTTTT TAATCACTAT GTTCGTTAAC 300

TGAGGGGATT ATGACCTTCA GCGCTTTGTA GAAAAAGAGC GAGAAATGCA GAGGATTTTT 360

GCGAATTGAG CAATAATTAA ATGATATGCA AAGAAAAAGC CCTGAGCTAA TGCTCAGGGC 420

TCTTAATAAG TGGCGGAACG GACGGGACTC GAACCCGCGA CCCCTGCGT GACAGGCAGG 480

TATTCTAACC AACTGAACTA CCGCTCCACC GAATTTCTTT GTCACAACCC GGATTTTCAT 540

CCCGTTTAC TGCAATTTGA TGCCTGGCAG TTTATGAATC ACTTCGTGAT TCACCCTTCG 600

GGCCGTTGCT TCGCAACGTT CAAAAGCTTT CGCTTTTGTC CTA CTCTCTG TCGAGTAGTG 660

AACTGCCCCG AAAGTTAATG CCATACTTCT AATTTGATGC CTGGCAGTTC CCTACTCTCG 720

CATGGGGAGA CCCCACTA CCATCGGCGC TACGGCGTTT CACTTCTGAG TTCGGCATGG 780

GGTCAGGTGG GACCACCGCG CTAGTGCCGC CAGGCAAATT CTTTGTGCTC TGTACGCAAT 840

TCTTTATCGC ATCAGCGGCG TTGCCTGCGC TCGTAACTC AGTCACATAC TTCTGTATGC 900

TCCTTCCTTT CCTTCGCTTG CCGCCTTGCT GCTGCGCAA TTATTGCGTA CTCAACTCTG 960

AATCACTGCT GAAAATCGTC TCTCATCCGC CAAAACATCT TCGGCGTTGT AAGGTTAAGC 1020

CTCACGGTTC ATTAGTACCG GTTAGCTCAA CGCATCGCTG CGCTTACACA CCCGGCCTAT 1080

CAACGTCGTC GTCTTCAACG TTCCTTCAGG AGACTCTAAG TCTCAGGGAG AACTCATCTC 1140

GGGGCAAGTT TCGTGCTTAG ATGCTTTCAG CACTTATCTC TTCCGCATTT AGCTACCGGG 1200

CAGTGCCATT GGCATGACAA CCCGAACACC AGTGATGCGT CCACTCCGGT CCTCTCGTAC 1260

TAGGAGCAGC CCCCTCAGT TCTCCAGCGC CCACGGCAGA TAGGGACCGA ACTGTCTCAC 1320

GACGTTCTAA ACCCAGCTCG CGTACCACTT TAAATGGCGA ACAGCCATAC CCTTGGGACC 1380

TACTTCAGCC CCAGGATGTG ATGAGCCGAC ATCGAGGTGC CAAACACCGC CGTCGATATG 1440

AACTCTGGG CGGTATCAGC CTGTTATCCC CGGAGTACCT TTTATCCGTT GAGCGATG 1498

>(209)C Miami\_NoNCBImatch

ATGTTTTGGC GGTTGAGAGA TGATTTTCAG CACTGATTCC GGATTTTCGG GAACGAAAGA 60

TAAGAGATTC GTTCCGGCA ACAGAATTTG CCTGGCGGCA CTAGCGCGGT GGTCCACCT 120

GACCCCATGC CGAACTCAGA AGTGAAACGC CGTAGCGCCG ATGGTAGTGT GGGGTCTCCC 180

CATGCGAGAG TAGGGAACTG CCAGGCATCA AATTAGAAGT ATGGCATTAA CTTTCGGGGC 240

AGTTCACTAC TCGACAGAGA GTAGGACAAA AGCGAAAGCT TTTGAACGTT GCGAAGCAAC 300

GGCCCGAAGG GTGAATCACG AAGTGATTCA TAAACTGCCA GGCATCAAAT TAAGCAGTAA 360

GCCGGTCATA AACTGGTGGT TGTAACAAAAA TTCGGTGGAG CGG

403

>(210)X Fresno\_Javiana\_CP032444\_CP074283

AGAGATAAGT GCTGAAAGCA TCTAAGCACG AAACCTGCCC CGAGATGAGT TCTCCCTGAG 60

ACTTAGAGTC TCCTGAAGGA ACGTTGAAGA CGACGACGTT GATAGGCCGG GTGTGTAAGC 120

GCAGCGATGC GTTGAGCTAA CCGGTACTAA TGAACCGTGA GGCTTAACCT TACAACGCCG 180

AAGATGTTTT GGCGGATGAG AGACGATTTT CAGCACTGAT TCAGATTACA TCAGAACGTA 240

AAAACGGTCT GATAACAGAA TTTGCCTGGC GGCCTAGCG CGGTGGTCCC ACCTGACCCC 300

ATGCCGAAC CAGAAGTGAA ACGCCGTAGC GCCGATGGTA GTGTGGGGTC TCCCCATGCG 360

AGAGTAGGGA ACTGCCAGGC ATCAAATTAA GCAGTAAACT GATGTAAAAA TCAGTGGTTG 420

TAAAAGAATT CGGTGGAGCG GTAGTTCAGT TGGTTAGAAT ACCTGCCTGT CACGCAGGGG 480

GTCGCGGGTT CGAGTCCCGT CCGTCCGCC ACTTATTAAG AGCCCTGAGC ATTAGCTCAG 540

GGCTTTTTCT TTGCATGTCA TTTAATTATT GCTCAATTCG CAAAATCCT CTGCATTTCT 600

CGCTCTTTTT CTGCAAAGCG CTGAAGGTCA TAATCCCCTC AGTTGACGAA CATAGTGATT 660

AAAAAGAGGA ATTCTATGAC TATCCCTGCA TTCGGTTTAG GTACTTTTCG CCTGAAAGAC 720

GACGTGGTTA TCGCTTCTGT TAAAACGGCG CTTGAACTGG GCTACCGTGC TGTCGACACT 780

GCACAGATCT ATGATAATGA AGCGGCTGTT GGACAGGCGA TTGCTGAAAG CGGTGTACCA 840

CGTAATGAGC TGTACATCAC CACCAAGATC TGGATTGAAA ACCTTAGCAA AGACAAACTA 900

ATCCCAAGCC TGAAAGAGAG CCTGAAAAA CTGCGTACCG ATTATGTCGA TCTGACGCTG 960

ATCCTACTGGC CATCTCCGGG TGATGCTGTG TCTGTCTGAAG AATTTATGCA GGCATTGCTG 1020

GAAGCTAAAA AACAAGGGCT GACTCGCGAA ATTGGCATT CAACTTCAC CATTCCGTTG 1080

ATGAAAAAGG CTATTGCCGC GGTGGGCGCA GACCATATCG CCACCAACCA GATTGAGCTA 1140

TCTCCGTATC TGCAGAATC

1159

>(211)C Heidelberg\_LS483494

ATGTTTTGGC GGATTGAGAA GACAACAATT TTCAGCTCAG ATTCAGAGTC CGAAGGATTT 60

TACGCTGAGA CAAGGCGGCA AACGCAGCGA CGGAAGGAGC ATACAGAAGT ATGTGACTGA 120

CGCTCGCAAG AGCAGCCAAC GCCGTATCAG TGTAAGAGAC ACAGGACGGA GCACAAAGAA 180

TTGCTGGC GGCCTAGCG CGGTGGTCCC ACCTGACCCC ATGCCGA ACT CAGAAGTGAA 240

ACGCCGTAGC GCCGATGGTA GTGTGGGGTC TCCCCATGCG AGAGTAGGGA ACTGCCAGGC 300

ATCAAATTAG AAGTATGGCA TTAACCTTCG GGGCAGTTCA CTA CTACTCGACA GAGAGTAGGA 360

CAAAAGCGAA AGCTTTTGAA CGTTGCGAAG CAACGGCCCG AAGGGTGAAT CACGAAGTGA 420

TTCATAAACT GCCAGGCATC AAATTGCAGT AAACCGGGAT GAAAATCCGG GTTGTGACAA 480

AGAAATTCGG TGGAGCGG

498

>(212)C Kentucky\_CP082582

ATGTTTTGGC GGATGAGAGA AGATTTTCAG CACTGATTCA GAGTTGAGTA CGCAATAATT 60

TGCGCAGCAG CAAGGCGGCA AGCGAAGGAA AGGAAGGAGC ATACAGAAGT ATGTGACTGA 120

GTTTACGAGC GCAGGCAACG CCGCTGATGC GATAAAGAAT TCGTACTGA GCATAAAAGA 180

ATTTGCCTGG CGGCAGTAGC GCGGTGGTCC CACCTGACCC CATGCCGAAC TCAGAAGTGA 240

AACGCCGTAG CGCCGATGGT AGTGTGGGGT CTCCCCATGC GAGAGTAGGG AACTGCCAGG 300

CATCAAATTA GAAGTATGGC ATTAAC TTTC GGGGCAGTTC ACTACTCGAC AGAGAGTAGG 360

ACAAAAGCGA AAGCTTTTGA ACGTTGCGAA GCAACGGCCC GAAGGGTGAA TCACGAAGTG 420

ATTCATAAAC TGCCAGGCAT CAAATTGCAG TAAACCGGGA TGAAAATCCG GGTGTGACA 480

AAGAAATTCG GTGGAGCGG

499

>(213)X Tennessee\_Montevideo\_Typhimurium\_CP007505\_CP030029\_CP034232\_

TGCGGAAGAG ATAAGTGCTG AAAGCATCTA AGCACGAAAC TTGCCCCGAG ATGAGTTCTC 60



CCTGAGACTT TAGGTCTCCT GAAGGAACGT TGAAGACGAC GACGTTGATA GGCCGGGTGT 120

GTAAGCGCAG CGATGCGTTG AGCTAACCGG TACTAATGAA CCGTGAGGCT TAACCTTACA 180

ACGCCGAAGA TGTTTTGGCG GATGAGAGAC GATTTTCAGC ACTGATTCAG ATTACATCAG 240

AACGTAAAA CGGTCTGATA ACAGAATTTG CCTGGCGGCA CTAGCGCGGT GGTCCCACCT 300

GACCCCATGC CGAACTCAGA AGTGAAACGC CGTAGCGCCG ATGGTAGTGT GGGGTCTCCC 360

CATGCGAGAG TAGGGAACTG CCAGGCATCA AATTAAGCAG TAAACTGATG TAAAAGTCAG 420

TGGTTGTAAA AGAATTCGGT GGAGCGGTAG TTCAGTTGGT TAGAATACCT GCCTGTCACG 480

CAGGGGGTCG CGGGTTCGAG TCCCGTCCGT TCCGCCACTT ATTAAGAGCC CTGAGCATT A 540

GCTCAGGGCT TTTTCTTTGC ATGTCATTTA ATTATTGCTC AATTCGCAA AATCCTCTGC 600

ATTTCTCGCT CTTTTCTGC AAAGCGCTGA AGGTCATAAT CCCCTCAGTT AACGAACATA 660

GTGATTA AAA AGAGGAATTC TATGACTATC CCTGCATTCG GTTTAGGTAC TTTTCGCCTG 720

AAAGACGACG TGGTTATCGC TTCTGTTAAA ACGGCGCTTG AACTGGGCTA CCGTGCTGTC 780

GACTGACAG ATGATCTATGA TAATGAAGCG GCTGTTGGAC AGGCGATTGC TGAAAGCGGT 840

GTACCACGTA ATGAGCTGTA CATCACCACC AAGATCTGGA TTGAAAACCT TAGCAAAGAC 900

AAGCTAATCC CAAGCCTGAA AGAGAGCCTG AAAAACTGC GTACCGATTA TGTCGATCTG 960

ACGCTGATCC ACTGGCCATC TCCGGGTGAT GCCGTGTCTG TCGAAGAATT TATGCAGGCA 1020

TTGCTGGAAG CTA AAAAACA AGGGCTGACT CGCGAAATTG GCATTTCAA CTTCACCATT 1080

CCGTTGATGG AAAAGGCTAT TGCCGCGGTG GCGCAGACC ATATCGCCAC CAACCAGATT 1140

GAGCTATCTC CGTATCTGCA GATCGTAAGG GTTGATGG 1178

>(214)C Kentucky\_NoNCBI match

ATGTTTTGGC GGATGAGAGA CGATTTTCAG CACTGATTCA GAGTTGAGTA CGCAATAATT 60

TGCGCAGCAG CAAGGCGGCA AGCGAAGGAA AGGAAGGAGC ATACAGAAGT ATGTGACTGA 120

GTTTACGAGC GCAGGCAACG CCGCTGATGC GATAAAGAAT TCGGTACAGA GCACAAAGAA 180

TTTGCTGGC GGCCTAGCG CGGTGGTCCC ACCTGACCCC ATGCCGAAGT CAGAAGTGAA 240

ACGCCGTAGC GCCGATGGTA GTGTGGGGTC TCCCATGCG AGAGTAGGGA ACTGCCAGGC 300

ATCAAATTAG AAGTATGGCA TTAAC TTTCG GGGCAGTTCA C TACTCGACA GAGAGTAGGA 360

CAAAAGCGAA AGCTTTTGAA CGTTGCGAAG CAACGGCCCG AAGGGTGAAT CACGAAGTGA 420

TTCATAAACT GCCAGGCATC AAATTGCAGT AAACCGGGAT GAAAATCCGG ATTGTGACAA 480

AGAAATTCGG TGGAGCGG

498

>(215)C Orion\_NoNCBImatch

ATGTTTTGGC GGATGAGAAG ACGATTTTCA GCAGTGATTC AGAGTTGAGT ACGCAATAAT 60

TTGCGCAGCA GCAAGGCGGC AAGCGAAGGA AAGGAAGGAG CATAACAGAAG TATGTGACTG 120

AGTTTACGAG CGCAGGCAAC GCCGCTGATG CGATAAAGAA TTGCGTACAG AGCACAAAGA 180

ATTTGCCTGG CGGCCGTAGC GCGGTGGTCC CACCTGACCC CATGCCGAAC TCAGAAGTGA 240

AACGCCGTAG CGCCGATGGT AGTGTGGGGT CTCCCATGC GAGAGTAGGG AACTGCCAGG 300

CATCAAATTA AGCAGTAAGC CGGTCATAGA CTGGTGGTTG TAAAAGAATT CGGTGGAGCG 360

G 361

>(216)C Unique\_NoNCBImatch

CTGTTTTGGC GGATTTGAGA AGACAGATTT TCAGCCTGAT ACAGATAAGA TTAACCGGCG 60

AAAAGCGGGT TAATAACAG AATTTGCCTG GCGGCTGTAG CGCGGTGGTC CCACCTGACC 120

CCATGCCGAA CTCAGAAGTG AAACGCCGTA GCGCCGATGG TAGTGTGGGG TCTCCCATG 180

CGAGAGTAGG GAACTGCCAG GCATCAAATA GCAGTAAACC GGGATGAAAA TCCGGGTGGT 240

GACAAAGAAA TTCGGTGGAG CGGT 264

>(217)C Reading\_NoNCBImatch

ATGTTTTGGC GGATGAGAGA CGATTTTCAG CACTGATTCA GAGTTGAGTA CGCAATAATT 60

TGCGCAGCAG CAAGGCGGCA AGCGAAGGAA AGGAAGGAGC ATACAGAAGT ATGTGACTGA 120

CTTTACGAGC GCAGGCAACG CCGCTGATGC GATAAAGAAT TCGGTACAGA GCACAAAAGA 180

ATTTGCCTGG CGGCACTAGC GCGGTGGTCC CACCTGACCC CATGCCGAAC TCAGAAGTGA 240

AACGCCGTAG CGCCGATGGT AGTGTGGGGT CTCCCATGC GAGAGTAGGG AACTGCCAGG 300

CATCAAATTA GAAGTATGGC ATTAAC TTTC GGGGCAGTTC ACTACTCGAC AGAGAGTAGG 360

ACAAAAGCGA AAGCTTTTGA ACGTTGCGAA GCAACGGCCC GAAGGGTGAA TCACGAAGTG 420

ATTCATAAAC TGCCAGGCAT CAAATTAAGC AGTAAACTGA TGTA AAAATC AGTGGTTGTA 480

AAAGAATTCG GTGGAGCGG

499

>(218)C Unique\_NoNCBI match

ATGTTTTGGC GGATGAGAGA AGATTTTCAG CACTGATTCA GATTACATCA GAACGTAAAA 60

ACGGTCTGAT AACAGAATTT GCCTGGCGGC ACTAGCGCGG TGGTCCCACC TGACCCCATG 120

CCGAACTCAG AAGTGAAACG CTGTAGCGCC GATGGTAGTG TGGGGTCTCC CCATGCGAGA 180

GTAGGGA ACT GCCAGGCATC AAATTAGAAG TATGGCATTACTTTTCGGGG CAGTTCACTA 240

CTCGACAGAG AGTAGGACAA AAGCGAAAGC TTTTGAACGT TGCGAAGCAA CGGCCCGAAG 300

GGTGAATCAC GAAGTGATTC ATAAACTGCC AGGCATCAAA TTGCAGTAAA CCGGGATGAA 360

AATCCGGGTT GTGACAAAGA AATTCGGTGG AGCGG 395

>(219)C Unique\_NoNCBImatch

ATGTTTTGGC GGATTGAGAA GACAACAATT TTCAGCTCAG ATTCAGAGTC CGAAGGATTT 60

TACGCTGAGA CAAGGCGGCA AACGCAGCGA CGGAAGGAGC ATACAGAAGT ATGTGACTGA 120

CGCTCGCAAG AGCAGCCAAC GCCGTATCAG TGTAAGAGAC ACAGGACGGA GCACAAAGAA 180

TTTGCCGGGC GGCCTAGCG CGGTGGTCCC ACCTGACCCC ATGCCGAAGT CAGAAGTGAA 240

ACGCCGTAGC GCCGATGGTA GTGTGGGGTC TCCCCATGCG AGAGTAGGGA ACTGCCAGGC 300

ATCAAATTAG AAGTATGGCA TTAACITTCG GGGCAGTTCA CTAICTGACA GAGAGTAGGA 360

CAAAGCGAA AGCTTTTGAA CGTTGCGAAG CAACGGCCCG AAGGGTGAAT CACGAAGTGA 420

TTCATAAACT GCCAGGCATC AAATTAAGCA GTAAACTGAT GTAAAAATCA GTGGTTGTAA 480

AAGAATTCGG TGGAGCGG 498

>(220)C Newport\_CP025232

ATGTTTTGGC GGATGAGAGA CGATTTTCAG CTCAGATTCA GATTACATCA GAACGTAAAA 60

ACGGTCTGAT AACAGAATTT GCCTGGCGGC ACTAGCGCGG TGGTCCCACC TGACCCCATG 120

CCGAACTCAG AAGTGAAACG CCGTAGCGCC GATGGTAGTG TGGGGTCTCC CCATGCGAGA 180

GTAGGGAAC TCCAGGCATC AAATTAGAAG TATGGCATT ACTTTCTGGG CAGTTCACTA 240

CTCGACAGAG AGTAGGACAA AAGCGAAAGC TTTTGAACGT TGCGAAGCAA CGGCCCGAAG 300

GGTGAATCAC GAAGTGATTC ATAACTGCC AGGCATCAAA TTAAGCAGTA AACTGATGTA 360

AAAATCAGTG GTTGATAAAG AATTCGGTGG AGCGG 395

>(221)C Onderstepoort\_CP022034

ATGTTTTGGC GATTGAGAAG ACGATTTTCA GCACTGATTC CGGATTTTCG GGAACGAAAG 60

ATAAAAGATT CGTTCCGGC AACAGAATTC GCCTGGCGGC ACTAGCGCGG TGGTCCCACC 120

TGACCCCATG CCGAACTCAG AAGTGAAACG CCGTAGCGCC GATGGTAGTG TGGGGTCTCC 180

CCATGCGAGA GTAGGGAAC TCCAGGCATC AAATTAGAAG TATGGCATT ACTTTCTGGG 240

CAGTTCACTA CTCGACAGAG AGTAGGACAA AAGCGAAAGC TTTTGAACGT TGCGAAGCAA 300

CGGCCCGAAG GGTGAATCAC GAAGTGATTC ATAACTGCC AGGCATCAAA TTGCAGTAAA 360

CCGGGATGAA AATCCGGGTT GTGACAAAGA AATTCGGTGG AGCGG 405

>(222)C Abaetetuba\_Newport\_CP007532\_CP074207

ATGTTTTGGC GGATGAGAAG ACAGATTTTC AGCACTGATT CAGATTACAT CAGAACGTAA 60

AAACGGTCTG ATAACAGAAT TTGCCTGGCG GCAGTAGCGC GGTGGTCCCA CCTGACCCCA 120

TGCCGAACTC AGAAGTGAAA CGCCGTAGCG CCGATGGTAG TGTGGGGTCT CCCCATGCGA 180

GAGTAGGGAA CTGCCAGGCA TCAAATTGCA GTAAACCGGG ATGAAAATCC GGGTTGTGAC 240

AAAGAAATTC GGTGGAGCGG 260

>(223)C Antsalova\_CP019116

ATGTTTTGGC GGATGAGAGA CGATTTTCAG CACTGATTCA GAGTTGAGTA CGCAATAATT 60

TGCGCAGCAG CAAGGCGGCA AGCGAAGGAA AGGAAGGAGC ATACAGAAGT ATGTGACTGA 120

GTTTACGAGC GCGGGCAACG CCGCTGATGC GATAAAGAAT TGCCTACTGA GCATAAAAGA 180

ATTTGCCTGG CGGCACTAGC GCGGTGGTCC CACCTGACCC CATGCCGAAC TCAGAAGTGA 240

AACGCCGTAG CGCCGATGGT AGTGTGGGGT CTCCCCATGC GAGAGTAGGG AACTGCCAGG 300

CATCAAATTG CAGTAAACCA GGATCAAAAT CCGGGTTGTG ACAAAAAAAT TCGGTGGAGC 360

GG 362

>(224)C Apapa\_CP019403

ATGTTTTGGC GGTTGAGAGA CGATTTTCAG CACTGATTCA GAGTTGAGTA CGCAATAATT 60

TGCGCAGCAG CAAGGCGGCA AGCGAAGGAA AGGCAGGAGC ATACAGAAGT ATGTGACTGA 120

CTTTACGAGC GCAGGCAACG CCGCTGATGC GATAAAGAAT TCGTACTGA GCACAAAAGA 180

ATTTGCCTGG CGGCACTAGC GCGGTGGTCC CACCTGACCC CATGCCGAAC TCAGAAGTGA 240

AACGCCGTAG CGCCGATGGT AGTGTGGGGT CTCCCATGC GAGAGTAGGG AACTGCCAGG 300

CATCAAATTA AGCAGTAAAC TGATGTAAAA ATCAGTGGTT GTAAAAGAAT TCGGTGGAGC 360

GG

362

>(225)C Djakarta\_CP019409

ATGTTTTGGC GGATGAGAGA CGATTTTCAG CACTGATTCA GAGTTGAGTA CGCAATAATT 60

TGCGCAGCAG CAAGGCAGCA AGCGAAGGAA AGGAAGGAGC ATACAGAAGT ATGTGACTGA 120

CTTTACGAGC GCAGGCAACG CCGCTGATGC GATAAAGAAT TCGTACTGA GCACAAAAGA 180

ATTTGCCTGG CGGCACTAGC GCGGTGGTCC CACCTGACCC CATGCCGAAC TCAGAAGTGA 240

AACGCCGTAG CGCCGATGGT AGTGTGGGGT CTCCCATGC GAGAGTAGGG AACTGCCAGG 300

CATCAAATTA AGCAGTAAGC CGGTCATAAA CCGGTGGTTG TAAAAGAATT CCGGTGGAGCG 360



G

361

>(226)C Hvittingfoss\_CP022503

CTGTTTTGGC GGATTGAGAA GACAACAATT TTCAGCTCAG ATTCAGAGTC CGAAGGATTT 60

TACGCTGAGA CAAGGCGGCA AACGCAGCGA CGGAAGGAGC ATACAGAAGT ATGTGACTGA 120

CGCCCGCAAG AGCAGCCAAC GCCGTATCAG TGTAAGAC ACAGGACAGA GCACAAAGAA 180

TTTGCTGGC GGCCTAGCG CGGTGGTCCC ACCTGACCCC ATGCCGAAT CAGAAGTGAA 240

ACGCCGTAGC GCCGATGGTA GTGTGGGGTC TCCCATGCG AGAGTAGGGA ACTGCCAGGC 300

ATCAAATTGC AGTAAACCGG GATGAAAATC CGGGTTGTGA CAAAGAAATT CGGTGGAGCG 360

G

361

>(227)C Quebec\_CP022019

ATGTTTTGGC GGTTGAGAGA CGATTTTCAG CACTGATTCA GATTACATCA GAACGTAAAA 60

ACGGTCTGAT AACAGAATTT GCCTGGCGGC ACTAGCGCGG TGGTCCCACC TGACCCCATG 120

CCGAATCAG AAGTGAACG CCGTAGCGCC GATGGTAGTG TGGGGTCTCC CCATGCGAGA 180

GTAGGGAAT GCCAGGCATC AATTTAAGCA GTAAACTGAT GTAAAAATCA GTGGTTGTAA 240

AAGAATTCGG TGGAGCGG

258

>(228)C Sloterdijk\_CP012349

ATGTTTTGGC GGATTGAGAG ACGATTTTCA GCACTGATTC AGAGTTGAGT ACGCAATAAT 60

TTGCGCAGCA GCAAGGCGGC AAGCGAAGGA AAGGAAGGAG CATAACAGAAG TATGTGACTG 120

AGTTTACGAG CGCAGGCAAC GCCGCTGATG CGATAAAGAA TTGCGTACAG AGCACAAAGA 180

ATTTGCCTGG CGGCACTAGC GCGGTGGTCC CACCTGACCC CATGCCGAAC TCAGAAGTGA 240

AACGCCGTAG CGCCGATGGT AGTGTGGGGT CTCCCCATGC GAGAGTAGGG AACTGCCAGG 300

CATCAAATTA AGCAGTAAAC TGATGTAAAA ATCAGTGGTT GTAAAAGAAT TCGGTGGAGC 360

GG

362

>(229)C Waycross\_CP022138

CTGTTTTGGC GGAAGTGAAG GACGAACAAT TTTCAGCACT GATTCCGGAT TTTCGGGAAC 60

GAAAGATTTT ACGCTGAGGC AAGGCGGCAA ATGAAGGAAA GGAAGGAGCA TACAGAAGTA 120

TGTGACTGAC TTTACGAATG CAGCCAACGC AGCATCGGTG TAAAAGATTC GTTTCTGGCA 180

ACAGAATTTG CCTGGCGGCA GTAGCGCGGT GGTCCACCT GACCCCATGC CGAACTCAGA 240

AGTGAAACGC CGTAGCGCCG ATGGTAGTGT GGGGTCTCCC CATGCGAGAG TAGGGAAGT 300

CCAGGCATCA AATTGCAGTA AACCGGGATG AAAATCCGGG TTGTGACAAA GAAATTCGGT 360

GGAGCGG

367

>(230)C India\_CP022015

ATGTTTTGGC GGATGAGAAG ACGATTTTCA GCACTGATTC AGAGTTGAGT ACGCAATAAT 60

TTGCGCAGCA GCAAGGCGGC AAGCGAAGGA AAGGAAGGAG CATAACAAG TATGTGACTG 120

AGTTTACGAG CGCAGGCAAC GCCGCTGATG CGATAAAGAA TTGCGTACTG AGCATAAAAG 180

AATTTGCCTG GCGGCACTAG CGCGGTGGTC CCACCTGACC CCATGCCGAA CTCAGAAGTG 240

AAACGCCGTA GCGCCGATGG TAGTGTGGGG TCTCCCATG CGAGAGTAGG GAACTGCCAG 300

GCATCAATTT AAGCAGTAAA CTGATGTAAA AATCAGTGGT TGTAAGAAGAA TTCGGTGGAG 360

CGG

363

>(231)C Alachua\_NoNCBI match

ATGTTTTGGC GGATGAGAAG ACGATTTTCA GCACTGATTC AGAGTTGAGT ACGCAATAAT 60

TTGCGCAGCA GCAAGGCGGC AAGCGAAGGA AAGGAAGGAG CATAACAAG TATGTGACTG 120

AGTTTACGAG CGCAGGCAAC GCCGCTGATG CGATAAAGAA TTGCGTACAG AGCACAAAGA 180

ATTTGCCTGG CGGCACTAGC GCGGTGGTCC CACCTGACCC CATGCCGAAC TCAGAAGTGA 240

AACGCCGTAG CGCCGATGGT AGTGTGGGGT CTCCCATGC GAGAGTAGGG AACTGCCAGG 300

CATCAAATTA AGCAGTAAGC CGGTCATAGA CTGGTGGTTG TAAAAGAATT CGGTGGAGCG 360

G 361

>(232)C Kentucky\_NoNCBImatch

ATGTTTTGGC GGATGAGAGA CGATTTTCAG CACTGATTCA GATTACATCA GAACGTAAAA 60

ACGGTCTGAT AACAGAATTT GCCTGGCGGC ACTAGCGCGG TGGTCCCACC TGACCCCATG 120

CCGAACTCAG AAGTGAAACG CCGTAGCGCC GATGGTAGTG TGGGGTCTCC CCATGCGAGA 180

GTAGGGA ACT GCCAGGCATC AAATTAGAAG TATGGCATTACTTTTCGGGG CAGTTCACTA 240

CTCGACAGAG AGTAGGACAA AAGCGAAAGC TTTTGAACGT TGCGAAGCAA CGGCCCGAAG 300

GGTGAATCAC GAAGTGATTC ATAACTGCC AGGCATCAAA TTGCAGTAAA CCGGGATGAA 360

AATCCGGATT GTGACAAAGA AATTCGGTGG AGCGG 395

>(233)C Haifa\_NoNCBImatch

ATGTTTTGGC GGTTGAGAGA AGATTTTCAG CACTGATTCC GGATTTTCGG GAACGAAAGA 60

TTTTACGCTG AGGCAAGGCG GCAAATGAAG GAAAGGAAGG AGCATACAGA AGTATGTGAC 120

TGACTTTACG AATGCAGCCA ACGCAGCATC GGTGTA AAAAG ATTCGTTTCC GGCAACAGAA 180

TTTGCCTGGC GGCCGTAGCG CGGTGGTCCC ACCTGACCCC ATGCCGA ACT CAGAAGTGAA 240

ACGCCGTAGC GCCGATGGTA GTGTGGGGTC TCCCATGCG AGAGTAGGGA ACTGCCAGGC 300

ATCAAATTAG AAGTATGGCA TTAAC TTTTCG GGGCAGTTCA C TACTCGACA GAGAGTAGGA 360

CAAAAGCGAA AGCTTTTGAA CGTTGCGAAG CAACGGCCCC AAGGGTGAAT CACGAAGTGA 420

TTCATAAACT GCCAGGCATC AAATTAAGCA GTAAACTGAT GTAAAAATCA GTGGTTGTAA 480

AAGAATTCGG TGGAGCGG

498

>(234)C London\_Concord\_CP060132\_CP028196

CTGTTTTGGC GGATTGAGAA GACAACAATT TTCAGCTCAG ATTCAGAGTC CGAAGGATTT 60

TACGCTGAGA CAAGGCGGCA AACGCAGCGA CGGAAGGAGC ATACAGAAGT ATGTGACTGA 120

CGCTCGCAAG AGCAGCCAAC GCCGTATCAG TGTA AAAGAC ACAGGACAGA GCACAAAGAA 180

TTTGCCTGGC GGCACTAGCG CGGTGGTCCC ACCTGACCCC ATGCCGA ACT CAGAAGTGAA 240

ACGCCGTAGC GCCGATGGTA GTGTGGGGTC TCCCATGCG AGAGTAGGGA ACTGCCAGGC 300

ATCAAATTAG AAGTATGGCA TTAAC TTTTCG GGGCAGTTCA C TACTCGACA GAGAGTAGGA 360

CAAAAGCGAA AGCTTTTGAA CGTTGCGAAG CAACGGCCCC AAGGATGAAT CACGAAGTGA 420

TTCATAAACT GCCAGGCATC AAATTAAGCA GTAAACTGAT GTAAAAATCA GTGGTTGTAA 480

AAGAATTCGG TGGAGCGG

498

>(235)C Unique\_NoNCBIMatch

ATGTTTTGGC GGATGAGAGA CGATTTTCAG CACTGATTCA GAGTTGAGTA CGCAATAATT 60

TGCGCAGCAG CAAGGCGGCA AGCGAAGGAA AGGAAGGAGC ATACAGAAGT ATGTGACTGA 120

CTTTACGAGC GCGGGCAACG CCGCTGATGC GATAAAGAAT TGCGTACAGA GCACAAAAGA 180

ATTTGCCTGG CGGCCGTAGC GCGGTGGTCC CACCTGACCC CATGCCGAAC TCAGAAGTGA 240

AACGCCGTAG CGCCGATGGT AGTGTGGGGT CTCCCCATGC GAGAGTAGGG AACTGCCAGG 300

CATCAAATTA AGCAGTAAAC TGATGTAAAA ATCAGTGGTT GTAAAAGAAT TCGGTGGAGC 360

GG

362

>(236)C Paratyphi\_B\_CP074668

ATGTTTTGGC GGATTGAGAA GACAACAATT TTCAGCTCAG ATTCAGAGTC CGAAGGATTT 60

TACGCTGAGA CAAGGCGGCA AACGCAGCGA CGGAAGGAGC ATACAGAAGT ATGTGACTGA 120

CGCTCGCAAG AGCAGCCAAC GCCGTATCAG TGTAAGAGAC ACAGGACAGA GCACAAAGAA 180

TTTGCCTGGC GGCAGTAGCG CGGTGGTCCC ACCTGACCCC ATGCCGA ACT CAGAAGTGAA 240

ACGCCGTAGC GCCGATGGTA GTGTGGGGTC TCCCCATGCG AGAGTAGGGA ACTGCCAGGC 300

ATCAAATTAG AAGTATGGCA TTAAC TTTTCG GGGCAGTTCA C TACTCGACA GAGAGTAGGA 360

CAAAAGCGAA AGCTTTTGAA CGTTGCGAAG CAAGGGCCCG AAGGGTGAAT CACGAAGTGA 420

TTCATAAACT GCCAAGCATC AAATTAAGCA GTAAACTGAT GTAAAAATCA GTGGTTGTAA 480

AAGAATTCGG TGGAGCGG

498

>(237)C Saintpaul\_CP023512

ATGTTTTGGC GGATGAGAGA CGATTTTCAG CACTGATTCC GGATTTTCGG GGACGAAAGA 60

TAAAAGATTC GTTCCGGCA ACAGAATTTG CCTGGCGGCA CTAGCGCGGT GGTCCCACCT 120

GACCCCATGC CGAACTCAGA AGTGAAACGC CGTAGCGCCG ATGGTAGTGT GGGGTCTCCC 180

CATGCGAGAG TAGGGA ACTG CCAGGCATCA AATTAGAAGT ATGGCATTAA CTTTCGGGGC 240

AGTTCACTAC TCGACAGAGA GTAGGACAAA AGCGAAAGCT TTTGAACGTT GCGAAGCAAC 300

GGCCCGAAGG GTGAATCACG AAGTGATTCA TAAACTGCCA GGCATCAAAT TGCAGTAAAC 360

CGGGATGAAA ATCCGGGTTG TGACAAAGAA ATTCGGTGGA GCGG

404

>(238)C Duisburg\_NoNCBI match

ATGTTTTGGC GGTTGAGAAG ACGATTTTCA GCACTGATTC AGAGTTGAGT ACGCAATAAT 60

TTGCGCAGCA GCAAGGCGGC AAGCGAAGGA AAGGAAGGAG CATAACAGAAG TATGTGACTG 120

AGTTTACGAG CGCAGGCAAC GCCGCTGATG CGATAAAGAA TTGCGTACAG AGCACAAAGA 180

ATTTGCCTGG CGGCAGTAGC GCGGTGGTCC CACCTGACCC CATGCCGAAC TCAGAAGTGA 240

AACGCCGTAG CGCCGATGGT AGTGTGGGGT CTCCCATGC GAGAGTAGGG AACTGCCAGG 300

CATCAAATTA GAAGTATGGC ATTAAC TTTC GGGGCAGTTC ACTACTCGAC AGAGAGTAGG 360

ACAAAAGCGA AAGCTTTTGA ACGTTGCGAA GCAACGGCCC GAAGGGTGAA TCACGAAGTG 420

ATTCATAAAC TGCCAGGCAT TAAATTGCAG TAAACCGGGA TGAAAATCCG GGTGTGACA 480

AAGAAATTCG GTGGAGCGG

499

>(239)C Pomono\_NoNCBI match

ATGTTTTGGC GGAAGTGAAG ACGATTTTCA GCACTGATTC CGGATTTTCG GGAACGAAAG 60

ATAAGAGATT CGTTTCCGGC AACAGAATTT GCCTGGCGGC ACTAGCGCGG TGGTCCCACC 120

TGACCCCATG CCGAACTCAG AAGTGAACG CCGTAGCGCC GATGGTAGTG TGGGGTCTCC 180

CCATGCGAGA GTAGGGA ACT GCCAGGCATC AAATTAGAAG TATGGCATTACTTTTCGGGG 240



CAGTTCACTA CTCGACAGAG AGTAGGACAA AAGCGAAAGC TTTTGAACGT TGCGAAGCAA 300

CGGCCCCGAAG GGTGAATCAC GAAGTGATTC ATAAACTGCC AGGCATCAAA TTAAGCAGTA 360

AGCCGGTCAT AACTGGTGG TTGTAAAAAA ATTCGGTGGA ACGG 404

>(240)C Unique\_NoNCBImatch

GTGTTTTGGC GGTTGAGAAG ACGATTTTCA GCACTGATTC CGGATTTTCG GGAACGAAAG 60

ATTTTACGCT GAGGCAAGGC GGCAAATGAA GGAAAGGAAG GAGCATACAG AAGTATGTGA 120

CTGACTTTAC GAATGCAGCC AACGCAGCAT CGGTGTAAAA GATTCGTTTC CGGCAACAGA 180

ATTTGCCTGG CGGCAGTAGC GCGGTGGTCC CACCTGACCC CATGCCGAAC TCAGAAGTGA 240

AACGCCGTAG CGCCGATGGT AGTGTGGGGT CTCCCCATGC GAGAGTAGGG AACTGCCAGG 300

CATCAAATTG CAGTAAACCG GGATGAAAAT CCGGGTTGTG ACAAAGAAAT TCGGTGGAGC 360

GG 362

>(241)C Goldcoast\_LR134158

ATGTTTTGGC GGATTGAGAA GACAACAATT TTCAGCTCAG ATTCAGAGTC CGAAGGATTT 60

TACGCTGAGA CAAGGCGGCA AACGCAGCGA CGGAAGGAGC ATACAGAAGT ATGTGACTGA 120

CGCTCGCAAG AGCAGCCAAC GCCGTATCAG TGTAAGAGAC ACAGGACAGA GCACAAAGAA 180

TTTGCTGGC GGCCTAGCG CGGTGGTCCC ACCTGACCCC ATGCCGAAC T CAGAAGTGAA 240

ACGCCGTAGC GCCGATGGTA GTGTGGGGTC TCCCCATGCG AGAGTAGGGA ACTGCCAGGC 300

ATCAAATTAG AAGTATGGCA TTAACITTCG GGGCAGTTCA CTAICTGACA GAGAGTAGGA 360

CAAAAGCGAA AGCTITTTGAA TGTTGCGAAG CAACGGCCCC AAGGGTGAAT CACGAAGTGA 420

TTCATAAACT GCCAGGCATC AAATTGCAGG AAACCGGGAT GAAAATCCGG GTTGTGACAA 480

AGAAATTCGG TGGAGCGG

498

>(242)X Corvallis CP027677

AATCCAGATC TTGGTGGTGA TGTACAGCTC GCTACGCGGT ACGCCGCTCT CAGCAATCGC 60

CTGTCCAACA GCCGCTTCAT TATCATAGAT TTGCGCAGTG TCGACAGCAC GGTAGCCCAG 120

TTCAAGCGCC GTTTTAACAG AAGCGATAAC CACGTCTCT TTCAGGCGAA AAGTACCTAA 180

ACCGAATGCA GGGATAGTCA TAGAATTCCT CTTTTAATC ACTATGTTCT TTAICTGAGG 240

GAATTATGAC CTTCAGCGCT TTGCAGAAGA AGAGCGAGAA ATGCAGAGGA TTTTTCGAA 300

TTGAGCAATA ATTAATGAC ATGCAAAGAA AAAGCCCTGA GCTAATGCTC AGGGCTCTTA 360

ATAAGTGGCG GAACGGACGG GACTCGAACC CGCGACCCCC TCGGTGACAG GCAGGTATTC 420

TAACCAACTG AACTACCGCT CCACCGAATT CTTTTACAAC CACTGACTTT TACATCAGTT 480

TACTGCTTAA TTTGATGCCT GGCAGTTCCC TACTCTCGCA TGGGGAGACC CCACACTACC 540

ATCGGCGCTA CGGCGTTTCA CTTCTGAGTT CGGCATGGGG TCAGGTGGGA CCACCGCGCT 600

AGTGCCGCCA GGCAAATTCT GTTATCAGAC CGTTTTTACG TTCTGATGTA ATCTGAATCA 660

GTGCTGAAAA TCATCTCTCA TCCGCCAAAA CATCTTCGGC GTTGTAAAGT TAAGCCTCAC 720

GGTTCATTAG TACCGTTAG CTCAACGCAT CGCTGCGCTT ACACACCCGG CCTATCAACG 780

TCGTCGTCTT CAACGTTCTC TCAGGAGACT CTAAGTCTCA GGGAGAACTC ATCTCGGGGC 840

AAGTTTCGTG CTTAGATGCT TTCAGCACTT ATCTCTCCG CATTAGCTA CCGG 894

>(243)C Unique\_NoNCBI match

ATGTTTTGGC GGATGAGAGA TGATTTTCAG CACTGATTCC GGATTTTCGG GAACGAAAGA 60

TAAAAGATTC GTTCCGGCA ACAGAATTTG CCTGGCGGCA CTAGCGCGGT GGTCCCACCT 120

GACCCCATGC CGAACTCAGA AGTGAAACGC CGTAGCGCCG ATGGTAGTGT GGGGTCTCCC 180

CATGCGAGAG TAGGGAAGT CCAGGCATCA AATTAGAAGT ATGGCATTAA CTTTCGGGGC 240

AGTTCACTAC TCGACAGAGA GTAGGACAAA AGCGAAAGCT TTTGAACGTT GCGAAGCAAC 300

GGCCCGAAGG GTGAATCACG AAGTGATTCA TAAACTGCCA GGCATCAAAT TAAGCAGTAA 360

GCCGGTCATA AACTGGTGGT TGTAACAAAAA TTCGGTGGAG CGGTAG 406

>(244)C Unique\_NoNCBImatch

ATGTTTTGGC GGATGAGAGA CGATTTTCAG CACTGATTCC GGATTTTCGG GAACGAAAGA 60

TTTTACGCTG AGGCAAGGCG GCAAATGAAG GAAAGGAAGA AGCATACAGA AGTATGTGAC 120

TGACTTTACG AATGCAGCCA ACGCAGCATC GGTGTAAAAG ATTCGTTTCT GGCAACAGAA 180

TTTGCTGGC GGCCTAGCG CGGTGGTCCC ACCTGACCCC ATGCCGAAC CAGAAGTGAA 240

ACGCCGTAGC GCCGATGGTA GTGTGGGGTC TCCCCATGCG AGAGTAGGGA ACTGCCAGGC 300

ATCAAATTAG AAGTATGGCA TTAACTTTCG GGGCAGTTCA CTAATCGACA GAGAGTAGGA 360

CAAAAGCGAA AGCTTTTGAA CGTTGCGAAG CAACGGCCCC AAGGGTGAAT CACGAAAGTA 420

TTCATAACT GCCAGGCATC AAATTAAGCA GTAAACTGAT GTAAAAATCA GTGGTTGTAA 480

GAGAATTCGG TGGAGCGG 498

>(245)C Unique\_NoNCBImatch

ATGTTTTGGC GGATGAGAGA CGATTTTCAG CAATGATTCC GGATTTTCGG GAACGAAAGA 60

TTTTACGCTG AGGCAAGGCG GCAAATGAAG GAAAGGAAGA AGCATACAGA AGTATGTGAC 120

TGACTTTACG AATGCAGCCA ACGCAGCATC GGTGTA AAAAG ATTCGTTTCT GGCAACAGAA 180

TTTGCTGGC GGCACTAGCG CGGTGGTCCC ACCTGACCCC ATGCCGA ACT CAGAAGTGAA 240

ACGCCGTAGC GCCGATGGTA GTGTGGGGTC TCCCATGCG AGAGTAGGGA ACTGCCAGGC 300

ATCAAATTAG AAGTATGGCA TTAAC TTTTCG GGGCAGTTCA C TACTCGACA GAGAGTAGGA 360

CAAAGCGAA AGCTTTTGAA CGTTGCGAAG CAACGGCCCG AAGGGTGAAT CACGAAGTGA 420

TTCATAAACT GCCAGGCATC AAATTAAGCA GTAAACTGAT GTAAAAATCA GTGGTTGTAA 480

AAGAATTCGG TGGAGCGG

498

>(246)C Unique\_NoNCBI match

ATGTTTTGGC GGATTGAGAA GACGAACAAT TTTCAGCTCA GATTCAGAGT CCGAAGGATT 60

TTACGCTGAG ACAAGGCGGC AAACGCAGCG ACGGAAGGAG CATA CAGAAG TATGTGACTG 120

ACGCTCGCAA GAGCAGCCAA CGCCGTATCA GTGTAAAAGA CACAGGACAG AGCACAAAGA 180

ATTTGCCTGG CGGCACTAGC GCGGTGGTCC CACCTGACCC CATGCCGAAC TCAGAAGTGA 240

AACGCCGTAG CGCCGATGGT AGTGTGGGGT CTCCCATGC GAGAGTAGGG AACTGCCAGG 300

CATCAAATAG AATGAAAGGC CCTGTCCGAA GACTGGGCCT TTTGTTTTAT CTGTAGTCTG 360

CCGGTGAGCA CTCTCCTGAG GAGGAGAAAT CCGCCGGGAG CGGATTTGAA CGTTGCGCAG 420

CAACGGCCCG GAGGGGTGGC GGGCAGGACG CCCGCCATAA ACTGCCAGGC ATCAAATTA 480

GCAGTAAGCC GGTCATAGAT CGGTGGTTGT AAAAGAATTC GGTGGAGCGG TAG 533

>(247)X\_Dessau\_Seftenberg\_CP047424\_CP038593

TCGGTACGCA GTTTTTTCAG GCTCTCTTC AGGCTTGGGA TTAGCTTGTC TTTGCTAAGG 60

TTTTCAATCC AGATCTTGGT GGTGATGTAC AGCTCATTAC GCGGTACGCC GCTCTCAGCA 120

ATCGCCTGTC CAACAGCCGC TTCATTATCA TAGATTTGCG CAGTGTCGAC AGCACGGTAG 180

CCCAGTTCAA GCGCCGTTTT CACAGAAGCG ATAACCACGT CGTCTTTCAG GCGAAAAGTA 240

CCTAAACCGA ATGCAGGGAT AGTCATAGAA TTCCTCTTTT TAATCACTAT GTTCGTTAAC 300

TGAGGGGATT ATGACCTTCA GCGCTTTGCA GAAAAAGAGC GAGAAATGCA GAGGATTTTT 360

GCGAATTGAG CAATAATTA ATGACAGGCA AAGAAAAAGC CCTGAGCTAA TGCTCAGGGC 420

TCTTAATAAG TGGCGGAACG GACGGGACTC GAACCCGCGA CCCCTGCGT GACAGGCAGG 480

TATTCTAACC AACTGAACTA CCGCTCCACC GAATTCTTTT ACAACCACTG ATTTTTACAT 540

CAGTTTACTG CTTAATTTGA TGCCTGGCAG TTCCTACTC TCGCATGGGG AGACCCACACA 600

CTACCATCGG CGCTACGGCG TTTCACTTCT GAGTTCGGCA TGGGGTCAGG TGGGACCACC 660

GCGCTACGGC CGCCAGGCAA ATTCTTTTAT GCTCTGTACG CAATTCTTTA TCGCATCAGC 720

GGCGTTGCCT GCGCTCGTAA ACTCAGTCAC AACTTCTGT ATGCTCCTC CTTTCCTTCG 780

CTTGCCGCCT TGCTGCTGCG CAAATTATTG CGTACTCAAC TCTGAATCAG TGCTGAAAAT 840

CATCTTCAT CCGCCAAAAC ATCTTCGGCG TTGTAAGGTT AAGCCTCACG GTTCATTAGT 900

ACCGGTTAGC TCAACGCATC GCTGCGCTTA CACACCCGGC CTATCAACGT CGTCGTCTTC 960

AACGTTCCCT CAGGAGACTC TAAGTCTCAG GGAGAACTCA TCTCGGGGCA AGTTTCGTGC 1020

TTAGATGCTT TCAGCACTTA TCTCTCCGC ATTAGCTAC CGGGCAGTGC CATTGGCATG 1080

ACAACCCGAA CACCAGTGAT GCGTCCACTC CGGTCCTCTC GTACTAGGAG CAGCCCCCT 1140

CAGTTCTCCA GCGCCCACGG CAGATAGGGA CCGAACTGTC TCACGACGTT CTAAACCCAG 1200

CTCGGTACC ACTTTAAATG GCGAACAGCC ATACCCTTGG GACCTACTTC AGCCCCAGGA 1260

TGTGATGAGC CGACATCGAG GTGCCAAACA CCGCCGTCGA TATGAACTCT TGGGCGGTAT 1320

CAGCCTGTTA TCCCCGAGT ACCTTTTATC CGTTGAGCGA TG 1362

>(248)X\_Sundsvall\_LS483457

TCGGTACGCA GTTTTTTCAG GCTCTCTTC AGGCTTGGGA TCAGCTTGTC TTTGCTAAGG 60

TTTTCAATCC AGATCTTAGT GGTGATGTAC AGCTCATTAC GCGGTACGCC GCTCTCAGCA 120

ATCGCCTGTC CAACAGCAAC TTCATTATCA TAGATTTGCG CAGTGTCGAC AGCACGGTAG 180

CCCAGTTCAA GCGCCGTTTT CACAGAAGCG ATAACCACGT CGTCTTTCAG GCGAAAAGTA 240

CCTAAACCGA ATGCAGGGAT AGTCATAGAA TTCCTCTTTT TAATCACTAT GTTCGTTAAC 300

TGAGGGGATT ATGACCTTCA GCGCTTTGTA GAAAAAGAGC GAAAAATGCA GAGGATTTTT 360

GCGAATTGAG CAATAATTAA ATGACAGGCA AAGAAAAAGC CCTGAGCTAA TGCTCAGGGC 420

TCTTAATAAG TGGCGGAACG GACGGGACTC GAACCCGCGA CCCCTGCGT GACAGGCAGG 480

TATTCTAACC AACTGAACTA CCGCTCCACC GAATTCTTTT ACAACCACTG ATTTTTACAT 540

CAGTTTACTG CTTAAATTGA TGCCTGGCAG TTCCCTACTC TCGCATGGGG AGACCCACACA 600

CTACCATCGG CGCTACGGCG TTCACTTCT GAGTTCGGCA TGGGGTCAGG TGGGACCACC 660

GCGCTAGTGC CGCCAGGCAA ATTCTTTTAT GCTCAGTACG CAATTCTTTA TCGCATCAGC 720

GGCGTTGCCT GCGCTCGTAA ACTCAGTCAC AACTTCTGT ATGCTCCTTC CTTTCCTTCG 780

CTTGCCGCCT TGCTGCTGCG CAAATTATTG CGTACTCAAC TCTGAATCAG TGCTGAAAAT 840

CGTCTTCAT CCGCCAAAAC ATCTTCGGCG TTGTAAGGTT AAGCCTCACG GTTCATTAGT 900

ACCGGTTAGC TCAACGCATC GCTGCGCTTA CACACCCGGC CTATCAACGT CGTCGTCTTC 960



AACGTTCTT CAGGAGACTC TAAGTCTCAG GGAGAACTCA TCTCGGGGCA AGTTTCGTGC 1020

TTAGATGCTT TCAGCACTTA TCTCTTCCGC ATTTAGCTAC CGGGCAGTGC CATTGGCATG 1080

ACAACCCGAA CACCAGTGAT GCGTCCACTC CGGTCCTCTC GTACTAGGAG CAGCCCCCT 1140

CAGTTCTCCA GCGCCCACGG CAGATAGGGA CCGAACTGTC TCACGACGTT CTAACCCAG 1200

CTCGGTACC ACTTTAAATG GCGAACAGCC ATACCCTTGG GACCTACTTC AGCCCCAGGA 1260

TGTGATGAGC CGACATCGAG GTGCCAAACA CCGCCGTCGA TATGAACTCT TGGGCGGTAT 1320

CAGCCTGTTA TCCCCGGAGT ACCTTTTATC CGTTGAGCGA TG 1362

>(249)X Bredeney\_Give-CP007533\_CP019174

AAGAGATAAG TGCTGAAAGC ATCTAAGCAC GAAACTTGCC CCGAGATGAG TTCTCCCTGA 60

GACTTAGAGT CTCCTGAAGG AACGTTGAAG ACGACGACGT TGATAGGCCG GGTGTGTAAG 120

CGCAGCGATG CGTTGAGCTA ACCGGTACTA ATGAACCGTG AGGCTTAACC TTACAACGCC 180

GAAGATGTTT TGGCGGTTGA GAAGACAACA ATTTTCAGCT CAGATTCAGA GTTGAGTACG 240

CAATAATTTG CGCAGCAGCA AGGCGGCAAG CGAAGGAAAG GAAGGAGCAT ACAGAAGTAT 300

GTGACTGACT TTACGAGCGC AGGCAACGCC GCTGATGCGA TAAAGAATTG CGTACTGAGC 360

ATAAAAGAAT TTGCCTGGCG GCACTAGCGC GGTGGTCCCA CCTGACCCCA TGCCGAACTC 420

AGAAGTGAAA CGCCGTAGCG CCGATGGTAG TGTGGGGTCT CCCCATGCGA GAGTAGGGAA 480

CTGCCAGGCA TCAAATTAAG CAGTAAGCCG GTCATAAACC GGTGGTTGTA AAAGAATCCG 540

GTGGAGCGGT AGTTCAGTTG GTTAGAATAC CTGCCTGTCA CGCAGGGGGT CGCGGGTTCG 600

AGTCCCGTCC GTTCCGCCAC TTATTAAGAG CCCTGAGCAT TAGCTCAGGG CTTTTTCTTT 660

GCCTGTCATT TAATTATTGC TCAATTCGCA AAAATCCTCT GCATTTCTCG CTCTTTTTCT 720

ACAAAGCGCT GAAGGTCATA ATCCCCTCAG TTAACGAACA TAGTGATTAA AAAGAGGAAT 780

TCTATGACTA TCCCTGCATT CGGTTTAGGT ACTTTTCGCC TGAAAGACGA CGTGGTTATC 840

GCTTCTGTGA AAACGGCGCT TGAAGTGGGC TACCGTGCTG TCGACACTGC GCAAATCTAT 900

GATAATGAAG TTGCTGTTGG ACAGGCGATT GCTGAGAGCG GCGTACCGCG TAATGAGCTG 960

TACATCACCA CTAAGATCTG GATTGAAAAC CTTAGCAAAG ACAAGCTGAT CCCAAGCCTG 1020

AAAGAGAGCC TGAAAAAACT GCGTACCGAT TATGTCGATC TGACGCTGAT CCACTGGCCA 1080

TCTCCGGGTG ATGCCGTGTC TGTCAAAAAT TATGCAGGCA TTGCTGGAAG CTAAAAAACA 1140

AGGGCTGACT CGCGAAATTG GCATTTCAAC TT

1172

>(250)X Chester\_CP019178

TCGGTACGCA GTTTTTTCAG GCTCTCTTC AGGCTTGGGA TTAGCTTGTC TTTGCTAAGG 60

TTTTCAATCC AGATCTTGGT GGTGATGTAC AGCTCATTAC GCGGTACGCC GCTCTCAGCA 120

ATCGCCTGTC CAACAGCCGC TTCATTATCA TAGATTTGCG CAGTGTCGAC AGCACGGTAG 180

CCTAGTTCAA GCGCCGCTTT AACAGAAGCG ATAACCACGT CGTCTTTCAG GCGAAAAGTA 240

CCTAAACCGA ATGCAGGGAT AGTCATAGAA TTCCTCTTTT TAATCACTAT GTTCGTTAAC 300

TGAGGGGATT ATGACCTTCA GCGCTTTGTA GAAAAAGAGC GAGAAATGCA GAGGATTTTT 360

GCGAATTGAG CAATAATTAA ATGACAGGCA AAGAAAAAGC CCTGAGCTAA TGCTCAGGGC 420

TCTTAATAAG TGGCGGAACG GACGGGACTC GAACCCGCGA CCCCTGCGT GACAGGCAGG 480

TATTCTAACC AACTGAACTA CCGCTCCACC GAATTTTTTT ACAACCACTG ATTTTTACAT 540

CAGTTTACTG CTAAATTGA TGCCTGGCAG TTCCTACTC TCGCATGGGG AGACCCACACA 600

CTACCATCGG CGCTACGGCG TTTCACTTCT GAGTTCGGCA TGGGGTCAGG TGGGACCACC 660

GCGCTACGGC CGCCAGGCAA ATTCTGTTGC CGGAAACGAA TCTTTTACAC CGATGCTGCG 720

TTGGCTGCAT TCGTAAAGTC AGTCACATAC TTCTGTATGC TCCTTCCTTT CCTTCATTTG 780

CCGCCTTGCC TCAGCGTAAA ATCTTTCGTT CCCGAAAATC CGGAATCAGT GCTGAAAATC 840

ATCTCTCAAC CGCCAAAACA TCTTCGGCGT TGTAAGGTTA AGCCTCACGG TTCATTAGTA 900

CCGGTTAGCT CAACGCATCG CTGCGCTTAC ACACCCGGCC TATCAACGTC GTCGTCTTCA 960

ACGTTCCCTC AGGAGACTCT AAGTCTCAGG GAGAACTCAT CTCGGGGCAA GTTTCGTGCT 1020

TAGATGCTTT CAGCACTTAT CTCTCCGCA TTTAGCTACC GGGCAGTGCC ATTGGCATGA 1080

CAACCCGAAC ACCAGTGATG CGTCCACTCC GGTCTCTCG TACTAGGAGC AGCCCCCTC 1140

AGTTCTCCAG CGCCACGGC AGATAGGGAC CGAACTGTCT CACGACGTTT TAAACCCAGC 1200

TCGCGTACCA CTTTAAATGG CGAACAGCCA TACCCTGGG ACCTACTTCA GCCCCAGGAT 1260

GTGATGAGCC GACATCGAGG TGCCAAACAC CGCCGTCGAT ATGAACTCTT GGGCGGTATC 1320

AGCCTGTTAT CCCC GGAGTA CCTTTTATCC GTTGAGCGAT G 1361

>(251)X Poona\_CP019189

TCGGTACGCA GTTTTTTCAG GCTCTCTTC AGGCTTGGGA TCAGCTTGTC TTTGCTAAGG 60

TTTTCAATCC AGATCTTAGT GGTGATGTAC AGCTCATTAC GCGGTACGCC GCTCTCAGCA 120

ATCGCCTGTC CAACAGCAAC TTCATTATCA TAGATTTGCG CAGTGTCGAC AGCACGGTAG 180

CCCAGTTCAA GCGCCGTTTT CACAGAAGCG ATAACCACGT CGTCTTTCAG GCGAAAAGTA 240

CCTAAACCGA ATGCAGGGAT AGTCATAGAA TTCCTCTTTT TAATCACTAT GTTCGTTAAC 300

TGAGGGGATT ATGACCTTCA GCGCTTTGTA GAAAAAGAGC GAGAAATGCA GAGGATTTTT 360

GCGAATTGAG CAATAATTAA ATGACAGGCA AAGAAAAAGC CCTGAGCTAA TGCTCAGGGC 420

TCTTAATAAG TGGCGGAACG GACGGGACTC GAACCCGCGA CCCCTGCGT GACAGGCAGG 480

TATTCTAACC AACTGAACTA CCGCTCCACC GAATTTCTTT GTCACAACCC GGATTTTCAT 540

CCCGGTTTAC TGCAATTTGA TGCCTGGCAG TTCCCTACTC TCGCATGGGG AGACCCCA 600

CTACCATCGG CGCTACGGCG TTCACTTCT GAGTTCGGCA TGGGGTCAGG TGGGACCACC 660

GCGCTAGTGC CGCCAGGCAA ATTCTTTTAT GCTCAGTACG CAATTCTTTA TCGCATCAGC 720

GGCGTTGCCT GCGCTCGTAA ACTCAGTCAC AACTTCTGT ATGCTCCTC CTTTCCTTCG 780

CTTGCCGCCT TGCTGCTGCG CAAATTATTG CGTACTCAAC TCTGAATCAG TGCTGAAAAT 840

CGTCTTCAT CCGCCAAAAC ATCTTCGGCG TTGTAAGGTT AAGCCTCACG GTTCATTAGT 900

ACCGGTTAGC TCAACGCATC GCTGCGCTTA CACACCCGGC CTATCAACGT CGTCGTCTTC 960

AACGTTCTT CAGGAGACCT AAAGTCTCAG GGAGAACTCA TCTCGGGGCA AGTTTCGTGC 1020

TTAGATGCTT TCAGCACTTA TCTCTTCCGC ATTAGCTAC CGGGCAGTGC CATTGGCATG 1080

ACAACCCGAA CACCAGTGAT GCGTCCACTC CGGTCTCTC GTACTAGGAG CAGCCCCCT 1140

CAGTTCTCCA GCGCCACGG CAGATAGGGA CCGAACTGTC TCACGACGTT CTAACCCAG 1200

CTCGCGTACC ACTTTAAATG GCGAACAGCC ATACCCTTGG GACCTACTTC AGCCCCAGGA 1260

TGTGATGAGC CGACATCGAG GTGCCAAACA CCGCCGTCGA TATGAACTCT TGGGCGGTAT 1320

CAGCCTGTTA TCCCCGGAGT ACCTTTTATC CGTTGAGCGA TG 1362

>(252)X Heidelberg\_CP051358

TCGGTACGCA GTTTTTTCAG GCTCTCTTC AGGCTTGGGA TTAGCTTGTC TTTGCTAAGG 60

TTTTCAATCC AGATCTTGGT GGTGATGTAC AGCTCGCTAC GTGGTACGCC GCTCTCAGTA 120

ATCGCCTGTC CAACAGCCGC TTCATTATCA TAGATTTGCG CAGTGTCGAC AGCACGGTAG 180

CCCAGTTCAA GCGCCGTTTT CACAGAAGCG ATAACCACGT CGTCTTTCAG GCGAAAAGTA 240

CCTAAACCGA ATGCAGGGAT AGTCATAGAA TTCCTCTTTT TAATCACTAT GTTCGTTAAC 300

TGAGGGGATT ATGACCTTCA GCGCTTTGTA GAAAAAGAGC GAGAAATGCA GAGGATTTTT 360

GCGAATTGAG CAATAATTAA ATCGCAGGCA AAGAAAAAGC CCTGAGCTAA TGCTCAGGGC 420

TCTTAATAAG TGGCGGAACG GACGGGACTC GAACCCGCGA CCCCTGCGT GACAGGCAGG 480

TATTCTAACC AACTGAACTA CCGCTCCACC GAATTTCTTT GTCACAACCC GGATTTTCAT 540

CCCGGTTTAC TGCAATTTGA TGCCTGGCAG TTTATGAATC ACTTCGTGAT TCACCCCTTCG 600

GGCCGTTGCT TCGCAACGTT CAAAAGCTTT CGCTTTTGTC CTA CTCTCTG TCGAGTAGTG 660

AACTGCCCCG AAAGTTAATG CCATACTTCT AATTTGATGC CTGGCAGTTC CCTACTCTCG 720

CATGGGGAGA CCCCACTA CCATCGGCGC TACGGCGTTT CACTTCTGAG TTCGGCATGG 780

GGTCAGGTGG GACCACCGCG CTAGTGCCGC CAGGCAAATT CTGTTATCAG ACCGTTTTTA 840

CGTTCTGATG TAATCTGAAT CAGTGCTGAA AATCGTCTCT CAACCGCAA AACATCTTCG 900

GCGTTGTAAG GTTAAGCCTC ACGGTCATT AGTACCGTT AGCTCAACGC ATCGCTGCGC 960

TTACACACCC GGCCTATCAA CGTCGTCGTC TTCAACGTTT CTCAGGAGA CTCTAAGTCT 1020

CAGGGAGAAC TCATCTCGGG GCAAGTTTCG TGCTTAGATG CTTTCAGCAC TTATCTCTTC 1080

CGCATTTAGC TACCGGGCAG TGCCATTGGC ATGACAACCC GAACACCAGT GATGCGTCCA 1140

CTCCGGTCCT CTCGTA TAG GAGCAGCCCC CCTCAGTTCT CCAGCGCCA CGGCAGATAG 1200

GGACCGAACT GTCTACGAC GTTCTAAACC CAGCTCGCGT ACCACTTTAA ATGGCGAACA 1260

GCCATACCCT TGGGACCTAC TTCAGCCCCA GGATGTGATG AGCCGACATC GAGGTGCCAA 1320

ACACCGCCGT CGATATGAAC TCTTGGGCGG TATCAGCCTG TTATCCCCGG AGTACCTTTT 1380

ATCCGTTGAG CGATG

1395

>(253)X Bergen\_CP019405

TCGGTACGCA GTTTTTTCAG GCTCTCTTC AGGCTTGGGA TTAGTTTGTC TTTGCTAAGG 60

TTTTCAATCC AGATCTTGGT GGTGATGTAC AGCTCATTAC GTGGTACACC GCTTTCAGCA 120

ATCGCCTGTC CAACAGCCGC TTCATTATCA TAGATCTGTG CAGTGTCGAC AGCACGGTAG 180

CCTAGTTCAA GCGCCGTTTT AACAGAAGCG ATAACCACGT CGTCTTTCAG GCGAAAAGTA 240

CCTAAACCGA ATGCAGGGAT AGTCATAGAA TTCCTCTTTT TAATCACTAT GTTCGTTAAC 300

TGAGGGGATT ATGACCTTCA GCGCTTTGCA GAAAAAGAGC GAGAAATGCA GAGGATTTTT 360

GCGAATTGAG CAATAATTAA ATGACATGCA AAGAAAAAGC CCTGAGCTAA TGCTCAGGGC 420

TCTTAATAAG TGGCGGAACG GACGGGACTC GAACCCGCGA CCCCTGCGT GACAGGCAGG 480

TATTCTAACC AACTGAACTA CCGCTCCACC GAATTCTTTT ACAACCACTG ATTTTTACAT 540

CAGTTTACTG CTTAATTTGA TGCCTGGCAG TTTATGAATC ACTTCGTGAT TCACCCTTCG 600

GGCCGTTGCT TCGCAACGTT CAAAAGCTTT CGCTTTTGTC CTA CTCTCTG TCGAGTAGTG 660

AACTGCCCCG AAAGTTAATG CCATACTTCT AATTTGATGC CTGGCAGTTC CCTACTCTCG 720

CATGGGGAGA CCCCACTA CCATCGGCGC TACGGCGTTT CACTTCTGAG TTCGGCATGG 780

GGTCAGGTGG GACCACCGCG CTAGTGCCGC CAGGCAAATT CTTTGTGCTC TGTCCTGTGT 840



CTTTTACT GATACGGCGT TGGCTGCTCT TGCAGCGTC AGTCACATAC TTCTGTATGC 900

TCCTCCGTC GCTGCGTTTG CCGCCTTGTC TCAGCGTAAA ATCCTTCGGA CTCTGAATCT 960

GAGCTGAAAA TTGTTGTCTT CTCAATCCGC CAAAACATCT TCGGCGTTGT AAGGTTAAGC 1020

CTCACGGTTC ATTAGTACCG GTTAGCTCAA CGCATCGCTG CGCTTACACA CCCGGCCTAT 1080

CAACGTCGTC GTCTTCAACG TTCCTCAGG AACTCTAAG TCTCAGGGAG AACTCATCTC 1140

GGGGCAAGTT TCGTGCTTAG ATGCTTTCAG CACTTATCTC TTCCGCATTT AGCTACCGGG 1200

CAGTGCCATT GGCATGACAA CCCGAACACC AGTGATGCGT CCACTCCGGT CCTCTCGTAC 1260

TAGGAGCAGC CCCCTCAGT TCTCCAGCGC CCACGGCAGA TAGGGACCGA ACTGTCTCAC 1320

GACGTTCTAA ACCCAGCTCG CGTACCACTT TAAATGGCGA ACAGCCATAC CCTTGGGACC 1380

TACTTCAGCC CCAGGATGTG ATGAGCCGAC ATCGAGGTGC CAAACACCGC CGTCGATATG 1440

AACTCTGGG CGGTATCAGC CTGTTATCCC CGGAGTACCT TTTATCCGTT GAGCGATG 1498

>(254)X Manhattan\_CP022497

CATCGCTCAA CGGATAAAAG GTACTCCGGG GATAACAGGC TGATACCGCC CAAGAGTTCA 60

TATCGACGGC GGTGTTTGGC ACCTCGATGT CGGCTCATCA CATCCTGGGG CTGAAGTAGG 120

TCCCAAGGGT ATGGCTGTTC GCCATTTAAA GTGGTACGCG AGCTGGGTTT AGAACGTCGT 180

GAGACAGTTC GGTCCCTATC TGCCGTGGGC GCTGGAGAAC TGAGGGGGGC TGCTCCTAGT 240

ACGAGAGGAC CGGAGTGGAC GCATCACTGG TGTTCTGGTT GTCATGCCAA TGGCACTGCC 300

CGGTAGCTAA ATGCGGAAGA GATAAGTGCT GAAAGCATCT AAGCACGAAA CTTGCCCCGA 360

GATGAGTTCT CCCTGAGACT TAGAGTCTCC TGAAGGAACG TTGAAGACGA CGACGTTGAT 420

AGGCCGGGTG TGTAAGCGCA GCGATGCGTT GAGCTAACCG GTACTAATGA ACCGTGAGGC 480

TTAACCTTAC AACGCCGAAG ATGTTTTGGC GGATTGAGAA GACAACAATT TTCAGCTCAG 540

ATTCAGAGTC CGAAGGATTT TACGCTGAGA CAAGGCGGCA AACGCAGCGA CGGAAGGAGC 600

ATACAGAAGT ATGTGACTGA CGCTCGCAAG AGCAGCCAAC GCCGTATCAG TGAAAAGAC 660

ACAGGACAGA GCACAAAGAA TTTGCCTGGC GGCCTAGCG CGGTGGTCCC ACCTGACCCC 720

ATGCCGAACT CAGAAGTGAA ACGCCGTAGC GCCGATGGTA GTGTGGGGTC TCCCCATGCG 780

AGAGTAGGGA ACTGCCAGGC ATCAAATTAG AAGTATGGCA TTAACITTCG GGGCAGTTCA 840

CTACTCGACA GAGAGTAGGA CAAAAGCGAA AGCTTTTGAA CGTTGCGAAG CAACGGCCCCG 900

AAGGGTGAAT CACGAAGTGA TTCATAAACT GCCAGGCATC AAATTAAGCA GTAAACTGAT 960

GTAAAAATCA GTGGTTGTAA AAGAATTCGG TGGAGCGGTA GTTCAGTTGG TTAGAATACC 1020

TGCCTGTCAC GCAGGGGGTC GCGGGTTCGA GTCCCGTCCG TTCCGCCACT TATTAAGAGC 1080

CCTGAGCATT AGCTCAGGGC TTTTCTTTT CCTGTCATTT AATTATTGCT CAATTCGCAA 1140

AAATCCTCTG CATTCTCGC TCTTTTCTG CAAAGCGCTG AAGGTCATAA TTCCCTCAGT 1200

TAACGAACAT AGTGATTAAG AAGAGGAATT CTATGACTAT CCCTGCATTC GGTTTAGGTA 1260

CTTTTCGCCT GAAAGACGAC GTGGTTATCG CTTCTGTAA AACGGCGCTT GAACTGGGCT 1320

ACCGTGCTGT CGACTGCG CAAATCTATG ATAATGAAGC GGCTGTTGGA CAGGCGATTG 1380

CTGAGAGCGG CGTACCGCGT AGCGAGCTGT ACATCACCAC CAAGATCTGG ATTGAAAACC 1440

TTAGCAAAGA CAAGCTAATC CCAAGCCTGA AAGAGAGCCT GAAAAAACTG CGTACCGA 1498

>(255)X Inverness\_CP075132

TGATCGCAGC AGATGAAGTG CCGGTATTAA CAACCAGCTC AGCCGAACTC GCCCGACAGC 60

AGCTTAGCGC ATAAATGGC TGTAGCTGGC TTCCTGTAAA CTGGGCAAAT GAAAAGGGCG 120

GATTACATAC CGTTGCCGAC AGCGCAACGC TTTCACGGCC ACTATACGCT ATTTGGCTGC 180

AAAACAGCGA TAAATACTCG CTGATCTGCG ATCTGTAAA AACGGATGTG CTGGATGAAC 240

AATGAAAATG ATGAAAAGAA AAAGAAGGGA ACTTACGATT ACCTGATCAG ATAATCAGGT 300

AATTTTAGGC AAAAAAAAT CCTTAGCAGA TGCTAAGGAT TATTTCTGGC AGGGGCGGAG 360

AGACTCGAAC TCCCAACACC CGGTTTTGGA GACCGGTGCT CTACCAATTG AACTACGCC 420

CTAATTAGGG TGGCGAACG GACGGGACTC GAACCCGCGA CCCCTGCGT GACAGGCAGG 480

TATTCTAACC AACTGAACTA CCGCTCCACC GAATTCTTTT ACAACCACTG ATTTTACAT 540

CAGTTTACTG CTTAATTTGA TGCCTGGCAG TTCCCTACTC TCGCATGGGG AGACCCACACA 600

CTACCATCGG CGCTACGGCG TTCACTTCT GAGTTCGGCA TGGGGTCAGG TGGGACCACC 660

GCGCTAGTGC CGCCAGGCAA ATTCTGTTAC CGGAAACGAA TCTTTTACAC CGATGCTGCG 720

TTGGCTGCAT TCGCAAAGTC AGTCACATAC TTCTGTATGC TCCTTCCTTT CCTTCATTTG 780

CCGCCTTGCC TCAGCGTAAA ATCTTTCGTT CCCGAAAATC CGGAATCAGT GCTGAAAATC 840

GTCTCTCATC CGCCAAAACA TCTTCGGCGT TGTAAGGTTA AGCCTCACGG TTCATTAGTA 900

CCGGTTAGCT CAACGCATCG CTGCGCTTAC ACACCCGGCC TATCAACGTC GTCGTCTTCA 960

ACGTTCTTC AGGAGACTCT AAGTCTCAGG GAGAATCAT CTCGGGGCAA GTTTCGTGCT 1020

TAGATGCTTT CAGCACTTAT CTCTCCGCA TTTAGCTACC GGGCAGTGCC ATTGGCATGA 1080

CAACCCGAAC ACCAGTGATG CGTCCACTCC GGTCTCTCG TACTAGGAGC AGCCCCCTC 1140

AGTTCTCCAG CGCCCACGGC AGATAGGGAC CGAACTGTCT CACGACGTTT TAAACCCAGC 1200

TCGCGTACCA CTTTAAATGG CGAACAGCCA TACCCTGGG ACCTACTTCA GCCCCAGGAT 1260

GTGATGAGCC GACATCGAGG TGCCAAACAC CGCCGTCGAT ATGAACTCTT GGGCGGTATC 1320

AGCCTGTTAT CCCCGGAGTA CCTTTTATCC GTTGAGCGAT 1360

>(256)X Othmarschen\_CP066260

TCGGTACGCA GTTTTTTCAG GCTCTCTTC AGGCTTGGGA TTAGCTTGTC TTTGCTAAGG 60

TTTTCAATCC AGATCTTGGT GGTGATGTAC AGCTCGCTAC GCGGTACGCC GCTCTCAGCA 120

ATCGCCTGTC CAACAGCCGC TTCATTATCA TAGATTTGCG CAGTGTCGAC AGCACGGTAG 180

CCCAGTTCAA GCGCCGTTTT CACAGAAGCG ATAACCACGT CGTCTTTCAG GCGAAAAGTA 240

CCTAAACCGA ATGCAGGGAT AGTCATAGAA TTCCTCTTTT TAATCACTAT GTTCGTTAAC 300

TGAGGGGATT ATGACCTTCA GCGCTTTGCA GAAAAAGAGC GAGAAATGCA GAGGATTTTT 360

GCGAATTGAG CAATAATTAA ATGACATGCA AAGAAAAAGC CCTGAGCTAA TGCTCAGGGC 420

TCTTAATAAG TGGCGGAACG GACGGGACTC GAACCCGCGA CCCCTGCGT GACAGGCAGG 480

TATTCTAACC AACTGAACTA CCGCTCCACC GAATTCTTTT ACAACCACTG ATTTTTACAT 540

CAGTTTACTG CTTAATTTGA TGCCTGGCAG TTTATGAATC ACTTCGTGAT TCACCCTTCG 600

GGCCGTTGCT TCGCAACGTT CAAAAGCTTT CGCTTTTGTC CTA CTCTCTG TCGAGTAGTG 660

AACTGCCCCG AAAGTTAATG CCATACTTCT AATTTGATGC CTGGCAGTTC CCTACTCTCG 720

CATGGGGAGA CCCCACTA CCATCGGCGC TACGGCGTTT CACTTCTGAG TTCGGCATGG 780

GGTCAGGTGG GACCACCGCG CTAGTGCCGC CAGGCAAATT CTTTGTGCTC TGTACGCAAT 840

TCTTTATCGC ATCAGCGGCG TTGCCTGCGC TCGTAAACTC AGTCACATAC TTCTGTATGC 900

TCCTTCCTT CCTTCGCTTG CCGCCTTGCT GCTGCGCAA TTATTGCGTA CTCAACTCTG 960

AATCAGTGCT GAAAATCATC TCTCATCCGC CAAAACATCT TCGGCGTTGT AAGGTTAAGC 1020

CTCACGGTTC ATTAGTACCG GTTAGCTCAA CGCATCGCTG CGCTTACACA CCCGGCCTAT 1080

CAACGTCGTC GTCTTCAACG TTCCTTCAGG AACTCTAAG TCTCAGGGAG AACTCATCTC 1140

GGGGCAAGTT TCGTGCTTAG ATGCTTTCAG CACTTATCTC TTCCGCATTT AGCTACCGGG 1200

CAGTGCCATT GGCATGACAA CCCGAACACC AGTGATGCGT CCACTCCGGT CCTCTCGTAC 1260

TAGGAGCAGC CCCCTCAGT TCTCCAGCGC CCACGGCAGA TAGGGACCGA ACTGTCTCAC 1320

GACGTTCTAA ACCCAGCTCG CGTACCACTT TAAATGGCGA ACAGCCATAC CCTTGGGACC 1380

TACTTCAGCC CCAGGATGTG ATGAGCCGAC ATCGAGGTGC CAAACACCGC CGTCGATATG 1440

AACTCTGGG CGGTATCAGC CTGTTATCCC CGGAGTACCT TTTATCCGTT GAGCGATG 1498

>(257)X Choleraesuis-var-Kunzendorf\_CP075031

TCGGTACGCA GTTTTTTCAG GCTCTCTTC AGGCTTGGGA TTAGTTTGTC TTTGCTAAGG 60

TTTTCAATCC AGATCTTGGT GGTGATGTAC AGCTCATTAC GTGGTACACC GCTTTCAGCA 120

ATCGCCTGTC CAACAGCCGC TTCATTATCA TAGATCTGTG CAGTGTCGAC AGCACGGTAG 180

CCCAGTTCAA GCGCCGTTTT AACAGAAGCG ATAACCACGT CGTCTTTCAG GCGAAAAGTA 240

CCTAAACCGA ATGCAGGGAT AGTCATAGAA TTCCTCTTTT TAATCACTAT GTTCGTTAAC 300

TGAGGGAATT ATGACCTTCA GCGCTTTGTA GAAAAAGAGC GAGAAATGCA GAGGATTTTT 360

GCGAATTGAG CAATAATTAA ATGACAGGCA AAGAAAAAGC CCTGAGCTAA TGCTCAGGGC 420

TCTTAATAAG TGGCGGAACG GACGGGACTC GAACCCGCGA CCCCTGCGT GACAGGCAGG 480

TATTCTAACC AACTGAACTA CCGCTCCACC GAATTTCTTT GTCACAATCC GGATTTTCAT 540

CCCGGTTTAC TGCAATTTGA TGCCTGGCAG TTTATGAATC ACTTCGTGAT TCACCCTTCG 600

GGCCGTTGCT TCGCAACGTT CAAAAGCTTT CGCTTTTGTC CTA CTCTCTG TCGAGTAGTG 660

AACTGCCCCG AAAGTTAATA CCATACTTCT AATTTGATGC CTGGCAGTTC CCTACTCTCG 720

CATGGGGAGA CCCCACTA CCATCGGCGC TACGGCGTTT CACTTCTGAG TTCGGCATGG 780

GGTCAGGTGG GACCACCGCG CTAGTGCCGC CAGGCAAATT CTTTTGTGCT CAGTACGCAA 840

TTCTTTATCG CATCAGCGGC GTTGCCCGCG CTCGTAAAGT CAGTCACATA CTTCTGTATG 900

CTCCTTCCTT TCCTTCGCTT GCCGCCTTGC TGCTGCGCAA ATTATTGCGT ACTCAACTCT 960

GAATCAGTGC TGAAAATTGT CTCTCATCCG CCAAACATC TTCGGCGTTG TAAGGTTAAG 1020

CCTCACGGTT CATTAGTACC GGTTAGCTCA ACGCATCGCT GCGCTTACAC ACCCGGCCTA 1080

TCAACGTCGT CGTCTTCAAC GTTCCTTCAG GAGACTCTAA GTCTCAGGGA GAACTCATCT 1140

CGGGGCAAGT TTCGTGCTTA GATGCTTTCA GCACTTATCT CTTCGCATT TAGCTACCGG 1200

GCAGTGCCAT TGGCATGACA ACCCGAACAC CAGTGATGCG TCCACTCCGG TCCTCTCGTA 1260

CTAGGAGCAG CCCCCCTCAG TTCTCCAGCG CCCACGGCAG ATAGGGACCG AACTGTCTCA 1320

CGACGTTCTA AACCCAGCTC GCGTACCACT TTAAATGGCG AACAGCCATA CCCTTGGGAC 1380

CTACTTCAGC CCCAGGATGT GATGAGCCGA CATCGAGGTG CCAAACACCG CCGTCGATAT 1440

GAACTCTTGG GCGGTATCAG CCTGTTATCC CCGGAGTACC TTTTATCCGT TGAGCGATG 1499

>(258)X Nitra\_CP019416

CATCGCTCAA CGGATAAAAG GTACTCCGGG GATAACAGGC TGATACCGCC CAAGAGTTCA 60

TATCGACGGC GGTGTTTGGC ACCTCGATGT CGGCTCATCA CATCCTGGGG CTGAAGTAGG 120



TCCCAAGGGT ATGGCTGTTC GCCATTTAAA GTGGTACGCG AGCTGGGTTT AGAACGTCGT 180

GAGACAGTTC GGTCCCTATC TGCCGTGGGC GCTGGAGAAC TGAGGGGGGC TGCTCCTAGT 240

ACGAGAGGAC CGGAGTGGAC GCATCACTGG TGTTCTGGGT GTCATGCCAA TGGCACTGCC 300

CGGTAGCTAA ATGCGGAAGA GATAAGTGCT GAAAGCATCT AAGCACGAAA CTTGCCCCGA 360

GATGAGTTCT CCCTGAGACT TAGAGTCTCC TGAAGGAACG TTGAAGACGA CGACGTTGAT 420

AGGCCGGGTG TGTAAGCGCA GCGATGCGTT GAGCTAACCG GTACTAATGA ACCGTGAGGC 480

TTAACCTTAC AACGCCGAAG ATGTTTTGGC GGATGAGAAG ACGATTTTCA GCAGTGATTG 540

AGAGTTGAGT ACGCAATACT TTGCGCAGCA GCAAGGCGGC AAGCGAAGGA AAGGAAGGAG 600

CATACAGAAG TATGTGACTG AGTTTACGAG CGCAGGCAAC GCCGCTGATG CGATAAAGAA 660

TTGCGTACAG AGCACAAAGA ATTTGCCTGG CGGCACTAGC GCGGTGGTCC CACCTGACCC 720

CATGCCGAAC TCAGAAGTGA AACGCCGTAG CGCCGATGGT AGTGTGGGGT CTCCCCATGC 780

GAGAGTAGGG AACTGCCAGG CATCAAATTA GAAGTATGGC ATTAAC TTTC GGGGCAGTTC 840

ACTACTCGAC AGAGAGTAGG ACAAAGCGA AAGCTTTTGA ACGTTGCGAA GCAACGGCCC 900

GAAGGGTGAA TCACGAAGTG ATTCATAAAC TGCCAGGCAT CAAATTGCAG TAAACCGGGA 960

TGAAAATCCG GGTTGTGACA AAGAAATTCG GTGGAGCGGT AGTTCAGTTG GTTAGAATAC 1020

CTGCCTGTCA CGCAGGGGGT CGCGGGTTCG AGTCCCGTCC GTTCCGCCAC TTATTAAGAG 1080

CCCTGAGCAT TAGCTCAGGG CTTTTTCTTT GCCTGCGATT TAATTATTGC TCAATTCGCA 1140

AAAATCCTCT GCATTTCTCG CTCTTTTCT ACAAAGCGCT GAAGGTCATA ATCCCCTCAG 1200

TTAACGAACA TAGTGATTAA AAAGAGGAAT TCTATGACTA TCCCTGCATT CGGTTTAGGT 1260

ACTTTTCGCC TGAAAGACGA CGTGGTTATC GCTTCTGTGA AAACGGCGCT TGAAGTGGC 1320

TACCGTGCTG TCGACACTGC GCAAATCTAT GATAATGAAG CGGCTGTTGG ACAGGCGATT 1380

ACTGAGAGCG GCGTACCACG TAGCGAGCTG TACATCACCA CCAAGATCTG GATTGAAAAC 1440

CTTAGCAAAG ACAAGCTAAT CCCAAGCCTG AAAGAGAGCC TGAAAAAACT GCGTACCGA 1499

>(259)X Mikawasima\_CP034713

TCGGTACGCA GTTTTTTCAG GCTCTCTTC AGGCTTGGGA TTAGCTTGTC TTTGCTAAGG 60

TTTTCAATCC AGATCTTGGT GGTGATGTAC AGCTCATTAC GCGGTACGCC GCTCTCAGCA 120

ATCGCCTGTC CAACAGCCGC TTCATTATCA TAGATTTGCG CAGTGTCGAC AGCACGGTAG 180

CCTAGTTCAA GCGCCGTTTT AACAGAAGCG ATAACCACGT CGTCTTTCAG GCGAAAAGTA 240

CCTAAACCGA ATGCAGGGAT AGTCATAGAA TTCCTCTTTT TAATCACTAT GTTCGTTAAC 300

TGAGGGGATT ATGACCTTCA GCGCTTTGTA GAAAAAGAGC GAGAAATGCA GAGGATTTTT 360

GCGAATTGAG CAATAATTA ATCGCAGGCA AAGAAAAAGC CCTGAGCTAA TGCTCAGGGC 420

TCTTAATAAG TGGCGGAACG GACGGGACTC GAACCCGCGA CCCCTGCGT GACAGGCAGG 480

TATTCTAACC AACTGAACTA CCGCTCCACC GAATTCTTTT ACAACCACTG ATTTTTACAT 540

CAGTTTACTG CTTAATTTGA TGCCTGGCAG TTTATGAATC ACTTCGTGAT TCACCCTTCG 600

GGCCGTTGCT TCGCAACGTT CAAAAGCTTT CGCTTTTGTC CTA CTCTCTG TCGAGTAGTG 660

AACTGCCCCG AAAGTTAATG CCATACTTCT AATTTGATGC CTGGCAGTTC CCTACTCTCG 720

CATGGGGAGA CCCCACTA CCATCGGCGC TACGGCGTTT CACTTCTGAG TTCGGCATGG 780

GGTCAGGTGG GACCACCGCG CTAGTGCCGC CAGGCAAATT CTGTTACCGG AAACGAATCT 840

TTTACACCGA TGCTGCGTTG GCTGCATTCG CAAAGTCAGT CACATACTTC TGTATGCTCC 900

TTCTTTCTC TCATTTGCCG CCTTGCCTCA GCGTAAAATC TTTCGTTCCC GAAAATCCGG 960

AATCAGTGCT GAAAATCGTC TCTCATCCGC CAAAACATCT TCGGCGTTGT AAGGTTAAGC 1020

CTCACGGTTC ATTAGTACCG GTTAGCTCAA CGCATCGCTG CGCTTACACA CCCGGCCTAT 1080

CAACGTCGTC GTCTCAACG TTCCTCAGG AGACCTAAAG TCTCAGGGAG AACTCATCTC 1140

GGGGCAAGTT TCGTGCTTAG ATGCTTTCAG CACTTATCTC TTCCGCATTT AGCTACCGGG 1200

CAGTGCCATT GGCATGACAA CCCGAACACC AGTGATGCGT CCACTCCGGT CCTCTCGTAC 1260

TAGGAGCAGC CCCCTCAGT TCTCCAGCGC CCACGGCAGA TAGGGACCGA ACTGTCTCAC 1320

GAGGTTCTAA ACCCAGCTCG CGTACCACTT TAAATGGCGA ACAGCCATAC CCTTGGGACC 1380

TACTTCAGCC CCAGGATGTG ATGAGCCGAC ATCGAGGTGC CAAACACCGC CGTCGATATG 1440

AACTCTTGGG CGGTATCAGC CTGTTATCCC CGGAGTACCT TTTATCCGTT GAGCGATG 1498

>(260)X SanDiego\_CP075040

TCGGTACGCA GTTTTTTCAG GCTCTCTTC AGGCTTGGGA TCAGCTTGTC TTTGCTAAGG 60

TTTTCAATCC AGATCTTAGT GGTGATGTAC AGCTCATTAC GCGGTACGCC GCTCTCAGCA 120

ATCGCCTGTC CAACAGCAAC TTCATTATCA TAGATTTGCG CAGTGTCGAC AGCACGGTAG 180

CCCAGTTCAA GCGCCGTTTT CACAGAAGCG ATAACCACGT CGTCTTTCAG GCGAAAAGTA 240

CCTAAACCGA ATGCAGGGAT AGTCATAGAA TTCCTCTTTT TAATCACTAT GTTCGTTAAC 300

TGAGGGGATT ATGACCTTCA GCGCTTTGTA GAAAAAGAGC GAGAAATGCA GAGGATTTTT 360

GCGAATTGAG CAATAATTAA ATGACAGGCA AAGAAAAAGC CCTGAGCTAA TGCTCAGGGC 420

TCTTAATAAG TGGCGGAACG GACGGGACTC GAACCCGCGA CCCCTGCGT GACAGGCAGG 480

TATTCTAACC AACTGAACTA CCGCTCCACC GAATTTTTTT ACAACCACCA GTTTATGACC 540

GGCTTACTGC TTAATTTGAT GCCTGGCAGT TTATCAATCA CTCGTGATT CACCCTTCGG 600

GCCGTTGCTT CGCAACGTTT AAAAGCTTTC GCTTTTGTCC TACTCTCTGT CGAGTAGTGA 660

ACTGCCCCGA AAGTTAATGC CATACTTCTA ATTTGATGCC TGGCAGTTCC CTACTCTCGC 720

ATGGGGAGAC CCCACACTAC CATCGGCGCT ACGGCGTTTC ACTTCTGAGT TCGGCATGGG 780

GTCAGGTGGG ACCACCGCGC TAGTGCCGCC AGGCAAATTC TGTTGCCAGA AACGAATCTC 840

TTATCTTTCG TTCCCGAAAA TCCGGAATCA GTGCTGAAAA TCGTCTCTCA ATCCGCCAAA 900

ACATCTTCGG CGTTGTAAGG TTAAGCCTCA CGGTTCATTA GTACCGGTTA GCTCAACGCA 960

TCGCTGCGCT TACACACCCG GCCTATCAAC GTCGTCTGTCT TCAACGTTCC TTCAGGAGAC 1020

CTAAAGTCTC AGGGAGAACT CATCTCGGGG CAAGTTTCGT GCTTAGATGC TTTCAGCACT 1080

TATCTCTTCC GCATTTAGCT ACCGGGCAGT GCCATTGGCA TGACAACCCG AACACCAGTG 1140

ATGCGTCCAC TCCGGTCCTC TCGTACTAGG AGCAGCCCCC CTCAGTTCTC CAGCGCCCAC 1200

GGCAGATAGG GACCGAACTG TCTCACGACG TTCTAAACCC AGCTCGCGTA CCACTTTAAA 1260

TGGCGAACAG CCATACCCTT GGGACCTACT TCAGCCCCAG GATGTGATGA GCCGACATCG 1320

AGGTGCCAAA CACCGCCGTC GATATGAACT CTTGGGCGGT ATCAGCCTGT TATCCCCGGA 1380

GTACCTTTTA TCCGTTGAGC GATG

1404

>(261)X Mbandaka\_CP019183

TCGGTACGCA GTTTTTTCAG GCTCTCTGC AGGCTTGGGA TTAGTTTGTC TTTGCTAAGG 60

TTTTCAATCC AGATCTTGGT GGTGATGTAC AGCTCGCTAC GTGGTACGCC GCTCTCAGCA 120

ATCGCCTGTC CAACAGCCGC TTCATTATCA TAGATTTGCG CAGTGTCGAC AGCACGGTAG 180

CCCAGTTCAA GCGCCGTTTT CACAGAAGCG ATAACCACGT CGTCTTTCAG GCGAAAAGTA 240

CCTAAACCGA ATGCAGGGAT AGTCATAGAA TTCCTCTTTT TAATCACTAT GTTCGTTAAC 300

TGAGGGGATT ATGACCTTCA GCGCTTTGTA GAAAAAGAGC GAGAAATGCA GAGGATTTTT 360

GCGAATTGAG CAATAATTAA ATGACAGGCA AAGAAAAAGC CCTGAGCTAA TGCTCAGGGC 420

TCTTAATAAG TGGCGGAACG GACGGGACTC GAACCCGCGA CCCCTGCGT GACAGGCAGG 480

TATTCTAACC AACTGAACTA CCGCTCCACC GAATTCTTTT ACAACCACTG ATTTTTACAT 540

CAGTTTACTG CTTAATTTGA TGCCTGGCAG TTTATGAATC ACTTCGTGAT TCACCCTTCG 600

GGCCGTTGCT TCGCAACGTT CAAAAGCTTT CGCTTTTGTC CTA CTCTCTG TCGAGTAGTG 660

AACTGCCCCG AAAGTTAATG CCATACTTCT AATTTGATGC CTGGCAGTTC CCTACTCTCG 720

CATGGGGAGA CCCACACTA CCATCGGCGC TACGGCGTTT CACTTCTGAG TTCGGCATGG 780

GGTCAGGTGG GACCACCGCG CTAGTGCCGC CAGGCAAATT CTGTTACCGG AAACGAATCT 840

TTTACACCGA TGCTGCGTTG GCTGCATTCG CAAAGTCAGT CACATACTTC TGTATGCTCC 900

TTCTTTCTCCT TCATTTGCCG CCTTGCCTCA GCGTAAAATC TTTCGTTCCC GAAAATCCGG 960

AATCAGTGCT GAAAATCGTC TCTCATCCGC CAAAACAGCT TCGGCGTTGT AAGGTTAAGC 1020

CTCACGGTTC ATTAGTACCG GTTAGCTCAA CGCATCGCTG CGCTTACACA CCCGGCCTAT 1080

CAACGTCGTC GTCTTCAACG TTCCTTCAGG AGACTCTAAG TCTCAGGGAG AACTCATCTC 1140

GGGGCAAGTT TCGTGCTTAG ATGCTTTCAG CACTTATCTC TTCCGCATTT AGCTACCGGG 1200

CAGTGCCATT GGCATGACAA CCCGAACACC AGTGATGCGT CCACTCCGGT CCTCTCGTAC 1260

TAGGAGCAGC CCCCTCAGT TCTCCAGCGC CCACGGCAGA TAGGGACCGA ACTGTCTCAC 1320

GACGTTCTAA ACCCAGCTCG CGTACCACTT TAAATGGCGA ACAGCCATAC CCTTGGGACC 1380

TACTTCAGCC CCAGGATGTG ATGAGCCGAC ATCGAGGTGC CAAACACCGC CGTCGATATG 1440

AACTCTGGG CGGTATCAGC CTGTTATCCC CGGAGTACCT TTTATCCGTT GAGCGAT 1497

>(262)X Reading\_CP051307

CATCGCTCAA CGGATAAAAG GTACTCCGGG GATAACAGGC TGATACCGCC CAAGAGTTCA 60

TATCGACGGC GGTGTTTGGC ACCTCGATGT CGGCTCATCA CATCCTGGGG CTGAAGTAGG 120

TCCCAAGGGT ATGGCTGTTC GCCATTTAAA GTGGTACGCG AGCTGGGTTT AGAACGTCGT 180

GAGACAGTTC GGTCCCTATC TGCCGTGGGC GCTGGAGAAC TGAGGGGGGC TGCTCCTAGT 240

ACGAGAGGAC CGGAGTGGAC GCATCACTGG TGTTCTGGGT GTCATGCCAA TGGCACTGCC 300

CGGTAGCTAA ATGCGGAAGA GATAAGTGCT GAAAGCATCT AAGCACGAAA CTTGCCCCGA 360

GATGAGTTCT CCCTGAGACT TAGAGTCTCC TGAAGGAACG TTGAAGACGA CGACGTTGAT 420

AGGCCGGGTG TGTAAGCGCA GCGATGCGTT GAGCTAACCG GTACTAATGA ACCGTGAGGC 480

TTAACCTTAC AACGCCGAAG ATGTTTTGGC GGATTGAGAA GACAACAATT TTCAGCTCAG 540

ATTCAGAGTC CGAAGGATTT TACGCTGAGA CAAGGCGGCA AACGCAGCGA CGGAAGGAGC 600

ATACAGAAGT ATGTGACTGA CGCTCGCAAG AGCAGCCAAC GCCGTATCAG TGTAAGAGAC 660

ACAGGACGGA GCACAAAGAA TTTGCCTGGC GGCCTAGCG CGGTGGTCCC ACCTGACCCC 720

ATGCCGAACT CAGAAGTGAA ACGCCGTAGC GCCGATGGTA GTGTGGGGTC TCCCATGCG 780

AGAGTAGGGA ACTGCCAGGC ATCAAATTAG AAGTATGGCA TTAACCTTCG GGGCAGTTCA 840

CTACTCGACA GAGAGTAGGA CAAAAGCGAA AGCTTTTGAA CGTTGCGAAG CAACGGCCCC 900



AAGGGTGAAT CACGAAGTGA TTCATAAACT GCCAGGCATC AAATTAAGCA GTAAACTGAT 960

GTAAAAATCA GTGGTTGTAA AAGAATTCGG TGGAGCGGTA GTTCAGTTGG TTAGAATACC 1020

TGCCTGTCAC GCAGGGGGTC GCGGGTTCGA GTCCCGTCCG TTCCGCCACT TATTAAGAGC 1080

CCTGAGCATT AGCTCAGGGC TTTTCTTTT CCTGTCATTT AATTATTGCT CAATTCGCAA 1140

AAATCCTCTG CATTCTCGC TCTTTTCTG CAAAGCGCTG AAGGTCATAA TTCCCTCAGT 1200

TAACGAACAT AGTGATTAAT AAGAGGAATT CTATGACTAT CCCTGCATTC GGTTTAGGTA 1260

CTTTTCGCCT GAAAGACGAC GTGGTTATCG CTTCTGTAA AACGGCGCTT GAACTGGGCT 1320

ACCGTGCTGT CGACACTGCG CAAATCTATG ATAATGAAGC GGCTGTTGGA CAGGCGATTG 1380

CTGAGAGCGG CGTACCGCGT AGCGAGCTGT ACATCACCAC CAAGATCTGG ATTGAAAACC 1440

TTAGCAAAGA CAAGCTAATC CCAAGCCTGA AAGAGAGCCT GAAAAAACTG CGTACCGA 1498

>(263)X Tennessee\_Gaminara\_CP075010\_CP024165

TCGGTACGCA GTTTTTTCAG GCTCTCTTC AGGCTTGGGA TCAGCTTGTC TTTGCTAAGG 60

TTTTCAATCC AGATCTTGGT GGTGATGTAC AGCTCATTAC GCGGTACGCC GCTCTCAGCA 120

ATCGCCTGTC CAACAGCCGC TTCATTATCA TAGATTTGCG CAGTGTCGAC AGCACGGTAG 180

CCCAGTTCAA GCGCCGTTTT CACAGAAGCG ATAACCACGT CGTCTTTCAG GCGAAAAGTA 240

CCTAAACCGA ATGCAGGGAT AGTCATAGAA TTCCTCTTTT TAATCACTAT GTTCGTTAAC 300

TGAGGGGATT ATGACCTTCA GCGCTTTGTA GAAAAAGAGC GAAAAATGCA GAGGATTTTT 360

GCGAATTGAG CAATAATTAA ATGACAGGCA AAGAAAAAGC CCTGAGCTAA TGCTCAGGGC 420

TCTTAATAAG TGGCGGAACG GACGGGACTC GAACCCGCGA CCCCTGCGT GACAGGCAGG 480

TATTCTAACC AACTGAACTA CCGCTCCACC GAATTTTTTT ACAACCACCA GTCTATGACC 540

GGCTTACTGC TTAATTTGAT GCCTGGCAGT TTATGAATCA CTTCGTGATT CACCCTTCGG 600

GCCGTTGCTT CGCAACGTTT AAAAGCTTTC GCTTTTGTCC TACTCTCTGT CGAGTAGTGA 660

ACTGCCCCGA AAGTTAATGC CATACTTCTA ATTTGATGCC TGGCAGTTCC CTA CTCTCTCGC 720

ATGGGGAGAC CCCACACTAC CATCGGCGCT ACGGCGTTTC ACTTCTGAGT TCGGCATGGG 780

GTCAGGTGGG ACCACCGCGC TAGTGCCGCC AGGCAAATTC TTTGTGCTCT GTCCTGTGTC 840

TTTTACTG ATACGGCGTT GGCTGCTCTT GCGAACGTCA GTCACATACT TCTGTATGCT 900

CCTCCGTCG CTGCGTTTGC CGCCTTGTCT CAGCGTAAAA TCCTTCGGAC TCTGAATCTG 960

AGCTGAAAAT CTTCTCTCAA TCCGCCAAAA CATCTTCGGC GTTGTAAGGT TAAGCCTCAC 1020

GGTTCATTAG TACCGGTTAG CTCAACGCAT CGCTGCGCTT ACACACCCGG CCTATCAACG 1080

TCGTCGTCTT CAACGTTCTT TCAGGAGACT CTAAGTCTCA GGGAGAACTC ATCTCGGGGC 1140

AAGTTTCGTG CTTAGATGCT TTCAGCACTT ATCTCTCCG CATTAGCTA CCGGGCAGTG 1200

CCATTGGCAT GACAACCCGA ACACCAGTGA TCGGTCCACT CCGGTCCTCT CGTACTAGGA 1260

GCAGCCCCC TCAGTTCTCC AGCGCCCACG GCAGATAGGG ACCGAACTGT CTCACGACGT 1320

TCTAAACCCA GCTCGCGTAC CACTTTAAAT GGCGAACAGC CATAACCTTG GGACCTACTT 1380

CAGCCCCAGG ATGTGATGAG CCGACATCGA GGTGCCAAAC ACCGCCGTCG ATATGAACTC 1440

TTGGGCGGTA TCAGCCTGTT ATCCCCGGAG TACCTTTTAT CCGTTGAGCG ATG 1493

>(264)X Milwaukee\_CP030175

TCGGTACGCA GTTTTTTCAG GCTCTCTTC AGGCTTGGGA TTAGCTTGTC TTTGCTAAGG 60

TTTTCAATCC AGATCTTGGT GGTGATGTAC AGCTCGCTAC GTGGTACGCC GCTCTCAGTA 120

ATCGCCTGTC CAACAGCCGC TTCATTATCA TAGATTTGCG CAGTGTCGAC AGCACGGTAG 180

CCCAGTTCAA GCGCCGTTTT CACAGAAGCG ATAACCACGT CGTCTTTCAG GCGAAAAGTA 240

CCTAAACCGA ATGCAGGGAT AGTCATAGAA TTCCTCTTTT TAATCACTAT GTTCGTTAAC 300

TGAGGGGATT ATGACCTTCA GCGCTTTGCA GAAAAAGAGC GAGAAATGCA GAGGATTTTT 360

GCGAATTGAG CAATAATTAA ATGACATGCA AAGAAAAAGC CCTGAGCTAA TGCTCAGGGC 420

TCTTAATAAG TGGCGGAACG GACGGGACTC GAACCCGCGA CCCCTGCGT GACAGGCAGG 480

TATTCTAACC AACTGAACTA CCGCTCCACC GAATTTCTTT GTCACAACCC GGATTTTCAT 540

CCCGGTTTAC TGCAATTTGA TGCCTGGCAG TTTATGAATC ACTTCGTGAT TCACCCCTCG 600

GGCCGTTGCT TCGCAACGTT CAAAAGCTTT CGCTTTTGTC CTA CTCTCTG TCGAGTAGTG 660

AACTGCCCCG AAAGTTAATG CCATACTTCT AATTTGATGC CTGGCAGTTC CCTACTCTCG 720

CATGGGGAGA CCCCACTA CCATCGGCGC TACGGCGTTT CACTTCTGAG TTCGGCATGG 780

GGTCAGGTGG GACCACCGCG CTAGTGCCGC CAGGCAAATT CTTTGTGCTC TGCCTGTGT 840

CTTTTACT GATACGGCGT TGGCTGCTCT TGCGAGCGTC AGTCACATAC TTCTGTATGC 900

TCCTCCGTC GCTGCGTTG CCGCCTTGTC TCAGCGTAAA ATCCTTCGGA CTCTGAATCT 960

GAGCTGAAAA TTGTTGTCTT CTCAATCCGC CAAAACATCT TCGGCGTTGT AAGGTTAAGC 1020

CTCACGGTTC ATTAGTACCG GTTAGCTCAA CGCATCGCTG CGCTTACACA CCCGGCCTAT 1080

CAACGTCGTC GTCTTCAACG TTCCTCAGG AGACTTTAAG TCTCAGGGAG AACTCATCTC 1140

GGGGCAAGTT TCGTGCTTAG ATGCTTTCAG CACTTATCTC TTCCGCATTT AGCTACCGGG 1200

CAGTGCCATT GGCATGACAA CCCGAACACC AGTGATGCGT CCACTCCGGT CCTCTCGTAC 1260

TAGGAGCAGC CCCCTCAGT TCTCCAGCGC CCACGGCAGA TAGGGACCGA ACTGTCTCAC 1320

GACGTTCTAA ACCCAGCTCG CGTACCACTT TAAATGGCGA ACAGCCATAC CCTTGGGACC 1380

TACTTCAGCC CCAGGATGTG ATGAGCCGAC ATCGAGGTGC CAAACACCGC CGTCGATATG 1440

AACTCTTGGG CGGTATCAGC CTGTTATCCC CGGAGTACCT TTTATCCGTT GAGCGATG 1498

>(265)X Paratyphi-B\_Typhimurium\_CP024619\_NC\_010102

TCGGTACGCA GTTTTTTCAG GCTCTCTTC AGGCTTGGGA TTAGCTTGTC TTTGCTAAGG 60

TTTTCAATCC AGATCTTGGT GGTGATGTAC AGCTCGCTAC GCGGTACGCC GCTCTCAGCA 120

ATCGCCTGTC CAACAGCCGC TTCATTATCA TAGATTTGCG CAGTGTCGAC AGCACGGTAG 180

CCCAGTTCAA GCGCCGTTTT AACAGAAGCG ATAACCACGT CGTCTTTCAG GCGAAAAGTA 240

CCTAAACCGA ATGCAGGGAT AGTCATAGAA TTCCTCTTTT TAATCACTAT GTTCGTTAAC 300

TGAGGGAATT ATGACCTTCA GCGCTTTGCA GAAAAAGAGC GAGAAATGCA GAGGATTTTT 360

GCGAATTGAG CAATAATTAA ATGACAGGAA AAGAAAAAGC CCTGAGCTAA TGCTCAGGGC 420

TCTTAATAAG TGGCGGAACG GACGGGACTC GAACCCGCGA CCCCTGCGT GACAGGCAGG 480

TATTCTAACC AACTGAACTA CCGCTCCACC GAATTTCTTT GTCACAACCC GGATTTTCAT 540

CCCGGTTTAC TGCAATTTGA TGCCTGGCAG TTTATGAATC ACTTCGTGAT TCACCCTTCG 600

GGCCGTTGCT TCGCAACGTT CAAAAGCTTT CGCTTTTGTC CTA CTCTCTG TCGAGTAGTG 660

AACTGCCCCG AAAGTTAATG CCATACTTCT AATTTGATGC CTGGCAGTTC CCTACTCTG 720

CATGGGGAGA CCCCACTA CCATCGGCG TACGGCGTTT CACTTCTGAG TTCGGCATGG 780

GGTCAGGTGG GACCACCGCG CTAGTGCCGC CAGGCAAATT CTTTGTGCTC TGACGCAAT 840

TCTTATCGC ATCAGCGGCG TTGCCTGCGC TCGTAACTC AGTCACATAC TTCTGTATGC 900

TCCTCCTTT CCTTCGCTTG CCGCCTTGCT GCTGCGCAA TTATTGCGTA CTCAACTCTG 960

AATCAGTGCT GAAAATCGTC TTCATCCGC CAAAACATCT TCGGCGTTGT AAGGTTAAGC 1020

CTCACGGTTC ATTAGTACCG GTTAGCTCAA CGCATCGCTG CGCTTACACA CCCGGCCTAT 1080

CAACGTCGTC GTCTTCAACG TTCCTCAGG AGACTCTAAG TCTCAGGGAG AACTCATCTC 1140

GGGGCAAGTT TCGTGCTTAG ATGCTTTCAG CACTTATCTC TTCCGCATTT AGCTACCGGG 1200

CAGTGCCATT GGCATGACAA CCCGAACACC AGTGATGCGT CCACTCCGGT CCTCTCGTAC 1260

TAGGAGCAGC CCCCTCAGT TCTCCAGCGC CCACGGCAGA TAGGGACCGA ACTGTCTCAC 1320

GACGTTCTAA ACCCAGCTCG CGTACCACTT TAAATGGCGA ACAGCCATAC CCTTGGGACC 1380

TACTTCAGCC CCAGGATGTG ATGAGCCGAC ATCGAGGTGC CAAACACCGC CGTCGATATG 1440

AACTCTGGG CGGTATCAGC CTGTTATCCC CGGAGTACCT TTTATCCGTT GAGCGATG 1498

>(266)X Java\_LT571437

TCGGTACGCA GTTTTTTCAG GCTCTCTTC AGGCTTGGGA TTAGCTTGTC TTTGCTAAGG 60

TTTTCAATCC AGATCTTGGT GGTGATGTAC AGCTCGCTAC GCGGTACGCC GCTCTCAGCA 120

ATCGCCTGTC CAACAGCCGC TTCATTATCA TAGATTTGCG CAGTGTCGAC AGCACGGTAG 180

CCCAGTTCAA GCGCCGTTTT AACAGAAGCG ATAACCACGT CGTCTTTCAG GCGAAAAGTA 240

CCTAAACCGA ATGCAGGGAT AGTCATAGAA TTCCTCTTTT TAATCACTAT GTTCGTTAAC 300

TGAGGGAATT ATGACCTTCA GCGCTTTGCA GAAAAAGAGC GAGAAATGCA GAGGATTTTT 360

GCGAATTGAG CAATAATTAA ATGACAGGAA AAGAAAAAGC CCTGAGCTAA TGCTCAGGGC 420

TCTTAATAAG TGGCGGAACG GACGGGACTC GAACCCGCGA CCCCTGCGT GACAGGCAGG 480

TATTCTAACC AACTGAACTA CCGCTCCACC GAATTTCTTT GTCACAACCC GGATTTTCAT 540

CCCGGTTTAC TGCAATTTGA TGCCTGGCAG TTTATGAATC ACTTCGTGAT TCACCCTTCG 600

GGCCGTTGCT TCGCAACGTT CAAAAGCTTT CGCTTTTGTC CTA CTCTCTG TCGAGTAGTG 660

AACTGCCCCG AAAGTTAATG CCATACTTCT AATTTGATGC CTGGCAGTTC CCTACTCTCG 720

CATGGGGAGA CCCCACTA CCATCGGCGC TACGGCGTTT CACTTCTGAG TTCGGCATGG 780

GGTCAGGTGG GACCACCGCG CTAGTGCCGC CAGGCAAATT CTTTGTGCTC TGTACGCAAT 840

TCTTTATCGC ATCAGCGGCG TTGCCTGCGC TCGTAAACTC AGTCACATAC TTCTGTATGC 900

TCCTTCCTTT CCTTCGCTTG CCGCCTTGCT GCTGCGCAA TTATTGCGTA CTCAACTCTG 960

AATCACTGCT GAAAATCGTC TCTCATCCGC CAAAACATCT TCGGCGTTGT AAGGTTAAGC 1020

CTCACGGTTC ATTAGTACCG GTTAGCTCAA CGCATCGCTG CGCTTACACA CCCGGCCTAT 1080

CAACGTCGTC GTCTTCAACG TTCCTTCAGG AGACCTAAAG TCTCAGGGAG AACTCATCTC 1140

GGGGCAAGTT TCGTGCTTAG ATGCTTTCAG CACTTATCTC TTCCGCATTT AGCTACCGGG 1200

CAGTGCCATT GGCATGACAA CCCGAACACC AGTGATGCGT CCACTCCGGT CCTCTCGTAC 1260

TAGGAGCAGC CCCCTCAGT TCTCCAGCGC CCACGGCAGA TAGGGACCGA ACTGTCTCAC 1320

GACGTTCTAA ACCCAGCTCG CGTACCACTT TAAATGGCGA ACAGCCATAC CCTTGGGACC 1380

TACTTCAGCC CCAGGATGTG ATGAGCCGAC ATCGAGGTGC CAAACACCGC CGTCGATATG 1440

AACTCTGGG CGGTATCAGC CTGTTATCCC CGGAGTACCT TTTATCCGTT GAGCGATG 1498

>(267)X Koessen\_CP019412

CATCGCTCAA CGGATAAAAG GTACTCCGGG GATAACAGGC TGATACCGCC CAAGAGTTCA 60



TATCGACGGC GGTGTTTGGC ACCTCGATGT CGGCTCATCA CATCCTGGGG CTGAAGTAGG 120

TCCCAAGGGT ATGGCTGTTC GCCATTTAAA GTGGTACGCG AGCTGGGTTT AGAACGTCGT 180

GAGACAGTTC GGTCCCTATC TGCCGTGGGC GCTGGAGAAC TGAGGGGGGC TGCTCCTAGT 240

ACGAGAGGAC CGGAGTGGAC GCATCACTGG TGTTCTGGGT GTCATGCCAA TGGCACTGCC 300

CGGTAGCTAA ATGCGGAAGA GATAAGTGCT GAAAGCATCT AAGCACGAAA CTTGCCCCGA 360

GATGAGTTCT CCCTGAGACT TTAGGTCTCC TGAAGGAACG TTGAAGACGA CGACGTTGAT 420

AGGCCGGGTG TGTAAGCGCA GCGATGCGTT GAGCTAACCG GTACTAATGA ACCGTGAGGC 480

TTAACCTTAC AACGCCGAAG ATGTTTTGGC GGATGAGAGA CGATTTTCAG CACTGATTCA 540

GAGTTGAGTA CGCAATAATT TGCGCAGCAG CAAGGCGGCA AGCGAAGGAA AGGAAGGAGC 600

ATACAGAAGT ATGTGACTGA GTTTACGAGC GCAGGCAACG CCGCTGATGC GATAAAGAAT 660

TGCGTACTGA GCATAAAGA ATTTGCCTGG CGGCACTAGC GCGGTGGTCC CACCTGACCC 720

CATGCCGAAC TCAGAAGTGA AACGCCGTAG CGCCGATGGT AGTGTGGGGT CTCCCCATGC 780

GAGAGTAGGG AACTGCCAGG CATCAATTTA AGCAGTAAAC TGATGTAAAA ATCAGTGGTT 840

GTAAAAGAAT TCGGTGGAGC GGTAGTTCAG TTGGTTAGAA TACCTGCCTG TCACGCAGGG 900

GGTCGCGGGT TCGAGTCCCG TCCGTTCCGC CACTTATTAA GAGCCCTGAG CATTAGCTCA 960

GGGCTTTTTT TTTGCCTGTC ATTTAATTAT TGCTCAATTC GCAAAAATCC TCTGCATTTT 1020

TCGCTCTTTT TCTACAAAGC GCTGAAGGTC ATAATCCCCT CAGTTAACGA ACATAGTGAT 1080

TAAAAAGAGG AATTCTATGA CTATCCCTGC ATTCGGTTTA GGTACTTTTC GCCTGAAAGA 1140

CGACGTGGTT ATCGCTTCTG TGAAAACGGC GCTTGAAGT GGCTACCGTG CTGTCGACAC 1200

TGCGCAAATC TATGATAATG AAGCGGCTGT TGGACAGGCG ATTGCTGAGA GCGGCGTACC 1260

ACGTAGCGAG CTGTACATCA CCACCAAGAT CTGGATTGAA AACCTTAGCA AAGACAAACT 1320

AATCCCAAGC CTGAAAGAGA GCCTGAAAAA ACTGCGTACC GA 1362

>(268)X Meleagris\_CP074321

AGAGATAAGT GCTGAAAGCA TCTAAGCACG AACTTGCCC CGAGATGAGT TCTCCCTGAG 60

ACTTAGAGTC TCCTGAAGGA ACGTTGAAGA CGACGACGTT GATAGGCCGG GTGTGTAAGC 120

GTAGCGATGC GTTGAGCTAA CCGGTACTAA TGAACCGTGA GGCTTAACCT TACAACGCCG 180

AAGATGTTTT GCGGATGAG AGACGATTTT CAGCAGTGAT TCAGAGTTGA GTACGCAATA 240

ATTTGCGCAG CAGCAAGGCG GCAAGCGAAG GAAAGGAAGG AGCATAACAG AGTATGTGAC 300

TGAGTTTACG AGCGCAGGCA ACGCCGCTGA TGCGATAAAG AATTGCGTAC AGAGCACAAA 360

GAATTTGCCT GGCGGCACTA GCGCGGTGGT CCCACCTGAC CCCATGCCGA ACTCAGAAGT 420

GAAACGCCGT AGCGCCGATG GTAGTGTGGG GTCTCCCAT GCGAGAGTAG GGAAGTGCCA 480

GGCATCAAAT TAGAAGTATG GCATTAAGTT TCGGGGCAGT TCACTACTCG ACAGAGAGTA 540

GGACAAAAGC GAAAGCTTTT GAACGTTGCG AAGCAACGGC CCGAAGGGTG AATCACGAAG 600

TGATTCATAA ACTGCCAGGC ATCAAATTGC AGTAAACCGG GATGAAAATC CGGGTTGTGA 660

CAAAGAAATT CGGTGGAGCG GTAGTTCAGT TGGTTAGAAT ACCTGCCTGT CACGCAGGGG 720

GTCGCGGGTT CGAGTCCCGT CCGTCCGCC ACTTATTAAG AGCCCTGAGC ATTAGCTCAG 780

GGCTTTTTCT TTGCATGTCA TTTAATTATT GCTCAATTCG CAAAATCCT CTGCATTTCT 840

CGCTCTTTTT CTGCAAAGCG CTGAAGGTCA TAATCCCCTC AGTTAACGAA CATAGTGATT 900

AAAAAGAGGA ATTCTATGAC TATCCCTGCA TTCGGTTTAG GTRACTTTTCG CCTGAAAGAC 960

GACGTGGTTA TCGCTTCTGT TAAAACGGCG CTTGAACTGG GCTACCGTGC TGTCGACACT 1020

GCACAGATCT ATGATAATGA AGCGGCTGTT GGACAGGCCA TTGCTGAAAG CGGTGTACCA 1080

CGTAATGAGC TGTACATCAC CACCAAGATC TGGATTGAAA ACCTTAGCAA GACAGCTAAT 1140

CCCAGCCTGA AAGAGAGCCT GAAAACTGC GTACCGATAT GTCGATCTGA CGCTGATCAC 1200

TGGCATCTCC GGTGATGCCT GTCTGTGAG AATTATGCAG GCTTGCTGGA AGCTAAAAAC 1260

AAGGCTGACC GC

1272
